# Supplementary material
Source: publisher site journal article supplement (https://www.dovepress.com/article/446431)
Supplement: Supplementary file 1 [file get_supplementary_file.php]

**Supplementary Table 1** Summary of Phase 3, Phase 3b/4, and LTE Studies Included in the Present Analysis

| ClinicalTrials.gov Identifier | Study Name and Protocol Number (Reference) | Patients Initially Receiving Tofacitinib |              | Patient Population                                                                           | Tofacitinib Doses                            | Control Arm                                  | Study Duration |
|-------------------------------|--------------------------------------------|------------------------------------------|--------------|----------------------------------------------------------------------------------------------|----------------------------------------------|----------------------------------------------|----------------|
|                               |                                            | 5 mg BID, N (N1)                         | 10 mg BID, N |                                                                                              |                                              |                                              |                |
| Phase 3/3b/4                  |                                            | 1376 (1000)                              | 642          |                                                                                              |                                              |                                              |                |
| NCT00814307                   | ORAL Solo, A3921045 <sup>1</sup>           | 243                                      | 245          | Active RA with inadequate response to $\geq 1$ cs/bDMARD <sup>a</sup>                        | 5 or 10 mg BID monotherapy                   | Placebo (advanced to tofacitinib at month 3) | 6 months       |
| NCT01039688                   | ORAL Start, A3921069 <sup>2</sup>          | 373                                      | 397          | Active RA, MTX-naïve <sup>b</sup>                                                            | 5 or 10 mg BID monotherapy                   | MTX                                          | 24 months      |
| NCT02187055                   | ORAL Strategy, A3921187 <sup>3</sup>       | 760                                      | N/A          | Active RA with incomplete response to MTX <sup>c</sup>                                       | 5 mg BID monotherapy or with background MTX  | Adalimumab 40 mg SC Q2W with background MTX  | 12 months      |
| LTE                           |                                            | 1504 (498)                               | 3463         |                                                                                              |                                              |                                              |                |
| NCT00413699                   | ORAL Sequel, A3921024 <sup>4</sup>         | 1123                                     | 3358         | Active RA who participated in the above studies                                              | 5 or 10 mg BID, concomitant DMARDs permitted | None                                         | 114 months     |
| NCT00661661                   | A3921041 <sup>5</sup>                      | 381                                      | 105          | Japanese patients with active RA who participated in studies A3921039, A3921040, or A3921044 | 5 or 10 mg BID, concomitant MTX permitted    | None                                         | 72 months      |

**Notes:** <sup>a</sup>The following washout criteria applied prior to first dose of study drug: anakinra, azathioprine, cyclosporine, etanercept, experimental NSAIDs, MTX, minocycline, penicillamine, ProSORBA device/column, sulfasalazine, and tacrolimus: 4 weeks; adalimumab: 6 weeks; auranofin, infliximab, and injectable gold: 8 weeks; leflunomide: 8 weeks if no elimination procedure was followed, 4 weeks with elimination procedure; certolizumab pegol and golimumab: 10 weeks; abatacept and tocilizumab: 12 weeks; and rituximab or other selective B lymphocyte depleting agents: 52 weeks and if CD19/20<sup>+</sup> counts were normal by FACS analysis. Antimalarials (hydroxychloroquine and chloroquine) were allowed, but if discontinued: 4 weeks. If antimalarials were continued, the dose must have been stable for at least 8 weeks prior to first dose of study drug. Patients who were already on oral corticosteroids must have been on a stable dose of  $\leq 10$  mg/day of prednisone or equivalent for 4 weeks prior to first dose of study drug. Any investigational treatment not mentioned elsewhere must have been discontinued for 4 weeks or 5 half-lives (whichever was longer).

<sup>b</sup>Patients should have been MTX-naïve; however, those who received  $\leq 3$  weekly doses, may have enrolled in the study if they completed a 4-week washout period prior to the first dose of study drug. The following washout criteria applied prior to first dose of study drug: anakinra, azathioprine, cyclosporine, etanercept, experimental NSAIDs, minocycline, penicillamine, ProSORBA device/column, sulfasalazine, and tacrolimus: 4 weeks; adalimumab: 6 weeks; auranofin, infliximab, and injectable gold: 8 weeks; leflunomide: 8 weeks if no elimination procedure was followed, 4 weeks with elimination procedure; golimumab: 10 weeks; abatacept, certolizumab pegol, and tocilizumab: 12 weeks; and rituximab or other selective B lymphocyte depleting agents: 52 weeks and if CD19/20<sup>+</sup> counts were normal by FACS analysis. Patients who were already on oral corticosteroids must be on a stable dose of  $\leq 10$  mg/day of prednisone or equivalent for 4 weeks prior to first dose of study drug. Any investigational treatment not mentioned elsewhere must have been discontinued for 4 weeks or 5 half-lives (whichever was longer).

Patients included in the study were required to discontinue all conventional synthetic DMARDs, other than MTX, for at least 4 weeks or 5 half-lives (whichever was longer), prior to baseline. Patients who had responded inadequately or had an adverse event secondary to treatment with a biological DMARD could be included but had to have discontinued with the following washout criteria: anakinra and etanercept: 4 weeks; infliximab: 8 weeks; golimumab: 10 weeks; abatacept, certolizumab pegol, and tocilizumab: 12 weeks; and rituximab or other selective B lymphocyte depleting agents: 52 weeks. Patients could have received stable NSAIDs, analgesics, or oral corticosteroids ( $\leq 10$  mg/day prednisone or equivalent), or a combination, throughout the trial.

**Abbreviations:** LTE, long-term extension; BID, twice daily; N, total number of patients; N1, number of patients initially receiving tofacitinib 5 mg monotherapy; RA, rheumatoid arthritis; cs/bDMARD, conventional synthetic/biologic disease-modifying antirheumatic drug; MTX, methotrexate; N/A, not applicable; SC, subcutaneous; Q2W, every 2 weeks; NSAID, non-steroidal anti-inflammatory drug; CD19/20<sup>+</sup>, cluster of differentiation 19/20<sup>+</sup>; FACS, fluorescence activated cell sorting.

**Supplementary Table 2** Summary of Relevant Articles Identified in the Literature Search

| Data Source                  | Available Data for Patients Receiving Tofacitinib Monotherapy for the Treatment of RA                 |                                                   |               |                     |                        |                              |                        |                              |                     |   |
|------------------------------|-------------------------------------------------------------------------------------------------------|---------------------------------------------------|---------------|---------------------|------------------------|------------------------------|------------------------|------------------------------|---------------------|---|
|                              | % Receiving Tofacitinib Monotherapy                                                                   | Demographics and Baseline Disease Characteristics | CDAI LDA Rate | CDAI Remission Rate | DAS 28-4(ESR) LDA Rate | DAS 28-4(ESR) remission Rate | DAS 28-4(CRP) LDA Rate | DAS 28-4(CRP) remission Rate | Treatment Retention |   |
| <b>Journal Articles</b>      |                                                                                                       |                                                   |               |                     |                        |                              |                        |                              |                     |   |
| Harnett et al <sup>6</sup>   | Truven MarketScan <sup>®</sup> and Optum <sup>®</sup> Clinformatics <sup>®</sup> claims databases, US | ✓                                                 | ✓             | ×                   | ×                      | ×                            | ×                      | ×                            | ×                   | ✓ |
| Mueller et al <sup>7,a</sup> | Retrospective chart review at the hospitals of St. Gallen and Aarau, Switzerland                      | ✓                                                 | ×             | ×                   | ×                      | ×                            | ×                      | ×                            | ×                   | × |
| Reed et al <sup>8</sup>      | US CorEvitas registry                                                                                 | ✓                                                 | ✓             | ✓                   | ×                      | ×                            | ×                      | ×                            | ×                   | × |
| Finckh et al <sup>9</sup>    | Swiss Clinical Quality Management in Rheumatoid Arthritis (SCQM-RA) registry                          | ✓                                                 | ×             | ×                   | ×                      | ×                            | ×                      | ×                            | ×                   | ✓ |
| Bilgin et al <sup>10</sup>   | Hacettepe University biological database (HUR-BİO), Turkey                                            | ✓                                                 | ×             | ×                   | ×                      | ×                            | ×                      | ×                            | ×                   | ✓ |
| Bird et al <sup>11</sup>     | Optimizing Patient outcomes in Australian rheumatology (OPAL) dataset                                 | ✓                                                 | ✓             | ×                   | ×                      | ×                            | ×                      | ×                            | ✓                   | ✓ |

| Data Source                       | Available Data for Patients Receiving Tofacitinib Monotherapy for the Treatment of RA                            |                                                   |               |                     |                        |                              |                        |                              |                     |   |
|-----------------------------------|------------------------------------------------------------------------------------------------------------------|---------------------------------------------------|---------------|---------------------|------------------------|------------------------------|------------------------|------------------------------|---------------------|---|
|                                   | % Receiving Tofacitinib Monotherapy                                                                              | Demographics and Baseline Disease Characteristics | CDAI LDA Rate | CDAI Remission Rate | DAS 28-4(ESR) LDA Rate | DAS 28-4(ESR) Remission Rate | DAS 28-4(CRP) LDA Rate | DAS 28-4(CRP) Remission Rate | Treatment Retention |   |
| <b>Congress Abstracts</b>         |                                                                                                                  |                                                   |               |                     |                        |                              |                        |                              |                     |   |
| Kavanaugh et al <sup>12</sup>     | US CorEvitas registry                                                                                            | ✓                                                 | ×             | ×                   | ×                      | ×                            | ×                      | ×                            | ×                   | × |
| Rojas et al <sup>13</sup>         | Observational study, Colombia                                                                                    | ✓                                                 | ×             | ×                   | ×                      | ×                            | ×                      | ×                            | ×                   | × |
| Gaujoux-Viala et al <sup>14</sup> | IDentification of Factors predictive of Tofacitinib's survival (DeFacTo) prospective observational study, France | ✓                                                 | ×             | ×                   | ×                      | ×                            | ×                      | ×                            | ×                   | × |
| Choquette et al <sup>15,a</sup>   | Rhumadata® clinical database and registry, Canada                                                                | ×                                                 | ×             | ×                   | ×                      | ×                            | ×                      | ×                            | ×                   | ✓ |
| Movahedi et al <sup>16,a</sup>    | Ontario Best Practices Research Initiative (OBRI), Canada                                                        | ✓                                                 | ×             | ×                   | ×                      | ×                            | ×                      | ×                            | ×                   | ✓ |
| Movahedi et al <sup>17,a</sup>    | Ontario Best Practices Research Initiative (OBRI) and Rhumadata® clinical database and registry, Canada          | ✓                                                 | ×             | ×                   | ×                      | ×                            | ×                      | ×                            | ×                   | ✓ |

**Note:** <sup>a</sup>The publication was not retrieved via search terms; it was manually identified in the literature by the authors.

**Abbreviations:** RA, rheumatoid arthritis; CDAI, Clinical Disease Activity Index; LDA, low disease activity; DAS28-4(ESR), Disease Activity Score in 28 joints, erythrocyte sedimentation rate; DAS28-4(CRP), Disease Activity Score in 28 joints, C-reactive protein; US, United States.

## References

1. Fleischmann R, Kremer J, Cush J, et al. Placebo-controlled trial of tofacitinib monotherapy in rheumatoid arthritis. *N Engl J Med.* 2012;367(6):495–507.
2. Lee EB, Fleischmann R, Hall S, et al. Tofacitinib versus methotrexate in rheumatoid arthritis. *N Engl J Med.* 2014;370(25):2377–2386.
3. Fleischmann R, Mysler E, Hall S, et al. Efficacy and safety of tofacitinib monotherapy, tofacitinib with methotrexate, and adalimumab with methotrexate in patients with rheumatoid arthritis (ORAL Strategy): a phase 3b/4, double-blind, head-to-head, randomised controlled trial. *Lancet.* 2017;390(10093):457–468.
4. Wollenhaupt J, Lee EB, Curtis JR, et al. Safety and efficacy of tofacitinib for up to 9.5 years in the treatment of rheumatoid arthritis: final results of a global, open-label, long-term extension study. *Arthritis Res Ther.* 2019;21(1):89.
5. Yamanaka H, Tanaka Y, Takeuchi T, et al. Tofacitinib, an oral Janus kinase inhibitor, as monotherapy or with background methotrexate, in Japanese patients with rheumatoid arthritis: an open-label, long-term extension study. *Arthritis Res Ther.* 2016;18:34.
6. Harnett J, Curtis JR, Gerber R, Gruben D, Koenig A. Initial experience with tofacitinib in clinical practice: treatment patterns and costs of tofacitinib administered as monotherapy or in combination with conventional synthetic

- DMARDs in 2 US health care claims databases. *Clin Ther.* 2016;38(6):1451–1463.
7. Mueller RB, Hasler C, Popp F, et al. Effectiveness, tolerability, and safety of tofacitinib in rheumatoid arthritis: a retrospective analysis of real-world data from the St. Gallen and Aarau cohorts. *J Clin Med.* 2019;8(10):1548.
  8. Reed GW, Gerber RA, Shan Y, et al. Real-world comparative effectiveness of tofacitinib and tumor necrosis factor inhibitors as monotherapy and combination therapy for treatment of rheumatoid arthritis. *Rheumatol Ther.* 2019;6(4):573–586.
  9. Finckh A, Tellenbach C, Herzog L, et al. Comparative effectiveness of antitumour necrosis factor agents, biologics with an alternative mode of action and tofacitinib in an observational cohort of patients with rheumatoid arthritis in Switzerland. *RMD Open.* 2020;6(1):e001174.
  10. Bilgin E, Ceylan F, Duran E, et al. Efficacy, retention, and safety of tofacitinib in real-life: Hur-bio monocentric experience. *Turk J Med Sci.* 2021;51(1):297–308.
  11. Bird P, Littlejohn G, Butcher B, et al. Real-world evaluation of effectiveness, persistence, and usage patterns of monotherapy and combination therapy tofacitinib in treatment of rheumatoid arthritis in Australia. *Clin Rheumatol.* 2022;41(1):53–62.

12. Kavanaugh A, Reed GW, Saunders KC, et al. Clinical characteristics of RA patients newly prescribed tofacitinib citrate (tofacitinib) in the United States after Food and Drug Administration approval: results from the Corrona US Rheumatoid Arthritis Registry [abstract]. *Arthritis Rheumatol.* 2014;66(suppl 10):1537.
13. Rojas Zuleta WG, Felipe Diaz OJ, Giraldo Herrera CL, et al. Therapy with tofacitinib in a Colombian population with rheumatoid arthritis: results of the daily clinical practice [abstract]. *Ann Rheum Dis.* 2019;78:AB0441.
14. Gaujoux-Viala C, Basch A, Lassoued S, et al. Real word experience with tofacitinib in patients with rheumatoid arthritis: an interim analysis from a French prospective observational study DeFacTo [abstract]. *Ann Rheum Dis.* 2021;80:POS0659.
15. Choquette D, Bessette L, Choquette Sauvageau L, et al. Tofacitinib monotherapy or combined with methotrexate in patients with rheumatoid arthritis show similar retention over four years. Report from Rhumadata<sup>®</sup> [abstract]. *Ann Rheum Dis.* 2020;79(suppl 1):AB0337.
16. Movahedi M, Cesta A, Li X, Keystone E, Bombardier C. Time to discontinuation of tofacitinib and TNF inhibitors in rheumatoid arthritis patients with and without methotrexate: real world results from a rheumatoid arthritis cohort [abstract]. *Arthritis Rheumatol.* 2020;72(suppl 10):0808.
17. Movahedi M, Choquette D, Coupal L, et al. Discontinuation rate of tofacitinib as monotherapy is similar compared to combination therapy with methotrexate in



rheumatoid arthritis patients: pooled data from two rheumatoid arthritis registries in Canada [abstract]. *Arthritis Rheumatol.* 2021;73(suppl 10):0827.

16.1.4 LIST OF INVESTIGATORS AND CORRESPONDING ETHICS COMMITTEES OR INSTITUTIONAL REVIEW BOARDS

Brazil

Coordinating Investigators:  
<None Entered>

| <u>Center</u> |            |            |            | <u>Institutional Review Board or Ethics Committee Address(es)</u>                                                                                       |
|---------------|------------|------------|------------|---------------------------------------------------------------------------------------------------------------------------------------------------------|
| 1042          | [REDACTED] | [REDACTED] | [REDACTED] | Hospital Heliopolis<br>Comite de Etica em Pesquisa<br>Rua Conego Xavier, 276. 10. andar<br>Sacoma<br>Sao Paulo, SP 04231-030<br>BRAZIL                  |
| 1043          | [REDACTED] | [REDACTED] | [REDACTED] | Comite de Etica em Pesquisa do<br>Hospital Geral de Goiania -<br>CEPHGG<br>Avenida Anhhaguera, 6479 - Setor<br>Oeste<br>Goiania, GO 74110-010<br>BRAZIL |

090177e1817606c9\Approved\Approved On: 12-Nov-2010 07:08 (GMT)

Center  
1044

[REDACTED]

[REDACTED]

[REDACTED]

**Institutional Review Board or  
Ethics Committee Address(es)**

Comite de Etica em Pesquisa em  
Seres Humanos do Hospital de  
Clinicas de Porto Alegre- HCPA  
Rua Ramiro Barcelos 2350, 2 andar  
Bom Fim  
Porto Alegre, RS 90035-903  
BRAZIL

1045

[REDACTED]

[REDACTED]

[REDACTED]

Comitê de Ética em Pesquisa em  
Seres Humanos do Hospital de  
Clínicas - UFPR  
Rua General Carneiro, 181  
Curitiba, PR 80060-900  
BRAZIL

090177e1817606c9\Approved\Approved On: 12-Nov-2010 07:08 (GMT)

Center  
1046

[REDACTED]

[REDACTED]

[REDACTED]

**Institutional Review Board or  
Ethics Committee Address(es)**

Comite de Etica em Pesquisa do  
Hospital Pro Cardiaco Pronto Socorro  
Cardiologico/PROCEP  
Rua Dona Mariana, 219  
Rio de Janeiro, RJ 22280-000  
BRAZIL

1125

[REDACTED]

[REDACTED]

[REDACTED]

Comite de Etica em Pesquisa da  
Pontificia Universidade Catolica do  
Rio Grande do Sul  
Av. ipiranga 6690-Conj.314 -3 andar  
Jardim Botanico  
Porto Alegre, RS 90610-000  
BRAZIL

090177e1817606c9\Approved\Approved On: 12-Nov-2010 07:08 (GMT)

Center  
1126

[REDACTED]

**Institutional Review Board or  
Ethics Committee Address(es)**  
Comite de Etica em Pesquisa do  
Instituto de Infectologia Emilio Ribas  
Av. Dr. Arnaldo, 165  
Sao Paulo, SP 01246-900  
BRAZIL

090177e1817606c9\Approved\Approved On: 12-Nov-2010 07:08 (GMT)

**Bulgaria**

**Coordinating Investigators:**

<None Entered>

**Center**

1093

[Redacted]

[Redacted]

[Redacted]

[Redacted]

**Institutional Review Board or Ethics Committee Address(es)**

Ethic Committee for Multicenter Trials  
Etichna komisiya za mnogocentrovni izpitvaniya  
ul. "Damyana Gruev" 8  
Sofia, 1303  
BULGARIA

Komisiya po etika pri MBAL na Voennomeditsinska Akademia - Sofia/Ethics Committee at MMA HAT-Sofia  
MMA HAT-Sofia  
Ul. Georgi Sofiyski  
3  
Sofia, 1606  
BULGARIA

1094

[Redacted]

[Redacted]

[Redacted]

Ethic Committee for Multicenter Trials  
Etichna komisiya za mnogocentrovni izpitvaniya  
ul. "Damyana Gruev" 8  
Sofia, 1303  
BULGARIA

Komisiya po etika pri DKTs "Sv. Anna" / Ethics Committee at DCC "Sv. Anna"  
DKTs "Sveta Anna"  
Diagnostic Consultative Center "Sveta Anna"  
Ul. Dimitar Mollov 1  
Sofia, 1709  
BULGARIA

090177e1817606c9ApprovedApproved On: 12-Nov-2010 07:08 (GMT)

| <u>Center</u> | [REDACTED] | [REDACTED] | [REDACTED] | [REDACTED] | <u>Institutional Review Board or Ethics Committee Address(es)</u>                                                                                                                                                                                                                                                                                                                     |
|---------------|------------|------------|------------|------------|---------------------------------------------------------------------------------------------------------------------------------------------------------------------------------------------------------------------------------------------------------------------------------------------------------------------------------------------------------------------------------------|
| 1095 *        | [REDACTED] |            | [REDACTED] | [REDACTED] | Ethic Committee for Multicenter Trials<br>Etichna komisiya za mnogocentrovni izpitvaniya<br>ul. "Damyani Gruev" 8<br>Sofia, 1303<br>BULGARIA                                                                                                                                                                                                                                          |
| 1096          | [REDACTED] |            | [REDACTED] | [REDACTED] | Ethic Committee for Multicenter Trials<br>Etichna komisiya za mnogocentrovni izpitvaniya<br>ul. "Damyani Gruev" 8<br>Sofia, 1303<br>BULGARIA<br><br>Komisiya po etika pri UMBAL "D-r Georgi Stranski" / Ethics Committee at MHAT "Dr. Georgi Stranski" UMBAL "D-r Georgi Stranski" Pleven<br>MHAT "Dr. Georgi Stranski" Pleven<br>Ul. Georgi Kochev<br>8A<br>Pleven, 5800<br>BULGARIA |

090177e1817606c9\Approved\Approved On: 12-Nov-2010 07:08 (GMT)

\* Did not randomize subjects

Center  
1097

[Redacted]

[Redacted]

[Redacted]

**Institutional Review Board or Ethics Committee Address(es)**

Ethic Committee for Multicenter Trials  
Etichna komisiya za mnogocentrovni izpitvaniya  
ul. "Damyani Gruev" 8  
Sofia, 1303  
BULGARIA

Komisiya po etika kam MBAL "Kaspela"/ Ethics committee at MHAT "Kaspela"  
MBAL 'Kaspela' Plovdiv  
MHAT 'Kaspela' Plovdiv  
Ul. Sofiya 64  
Plovdiv, 4002  
BULGARIA

1122

[Redacted]

[Redacted]

[Redacted]

Ethic Committee for Multicenter Trials  
Etichna komisiya za mnogocentrovni izpitvaniya  
ul. "Damyani Gruev" 8  
Sofia, 1303  
BULGARIA

Komisiya po etika pri MBAL-Plovdiv/Ethics Committee at MHAT-Plovdiv  
MBAL-Plovdiv  
MHAT-Plovdiv  
bul. Bulgaria 234  
Plovdiv, 4000  
BULGARIA

090177e1817606c9\Approved\Approved On: 12-Nov-2010 07:08 (GMT)



Chile

Coordinating Investigators:

<None Entered>

Center

**Institutional Review Board or Ethics Committee Address(es)**

1072

[Redacted]

Comite Etico Cientifico  
Servicio de Salud Metropolitano  
Oriente  
Av. Salvador 364  
Providencia, Santiago, RM 7500922  
CHILE

1073

[Redacted]

Comite Etico Cientifico  
Servicio de Salud Metropolitano  
Oriente  
Av. Salvador 364  
Providencia, Santiago, RM 7500922  
CHILE

1074

[Redacted]

Comite de Etica  
Clinica Santa Maria  
Avenida Santa Maria 0410  
Santiago,  
CHILE

Comite Etico Cientifico  
Servicio de Salud Metropolitano  
Oriente  
Av. Salvador 364  
Providencia, Santiago, RM 7500922  
CHILE

090177e1817606c9\Approved\Approved On: 12-Nov-2010 07:08 (GMT)

**Colombia**

**Coordinating Investigators:**

<None Entered>

**Center**

1092

[REDACTED]

**Institutional Review Board or Ethics Committee Address(es)**

Comite de ética en Investigación de Servimed E.U  
Calle 51 No. 34-17. Centro comercial Cabecera Etapa I.  
Bucaramanga, Santander  
COLOMBIA

1135

[REDACTED]

Comité de etica independiente centro de reumatologia y ortopedia  
Cr. 49C No. 82-120  
Barranquilla, Atlantico 0000  
COLOMBIA

090177e1817606c9\Approved\Approved On: 12-Nov-2010 07:08 (GMT)

Czech Republic

Coordinating Investigators:

<None Entered>

| <u>Center</u> |  |  |  |  | <u>Institutional Review Board or Ethics Committee Address(es)</u>                                           |
|---------------|--|--|--|--|-------------------------------------------------------------------------------------------------------------|
| 1103          |  |  |  |  | Eticka komise IKEM a FTNsP<br>Videnska 800<br>Praha 4 Krc, 140 59<br>CZECH REPUBLIC                         |
| 1104          |  |  |  |  | Eticka komise IKEM a FTNsP<br>Videnska 800<br>Praha 4 Krc, 140 59<br>CZECH REPUBLIC                         |
| 1105          |  |  |  |  | Eticka komise pri Fak. Thomayerove<br>nemocnici a IKEM<br>Videnska 800<br>Praha 4, 140 59<br>CZECH REPUBLIC |
| 1106          |  |  |  |  | Eticka komise IKEM a FTNsP<br>Videnska 800<br>Praha 4 Krc, 140 59<br>CZECH REPUBLIC                         |
| 1107          |  |  |  |  | Eticka komise IKEM a FTNsP<br>Videnska 800<br>Praha 4 Krc, 140 59<br>CZECH REPUBLIC                         |

090177e1817606c9\Approved\Approved On: 12-Nov-2010 07:08 (GMT)

| <u>Center</u><br>1113 | [REDACTED] | [REDACTED] | [REDACTED] | [REDACTED] | <b><u>Institutional Review Board or<br/>Ethics Committee Address(es)</u></b>             |
|-----------------------|------------|------------|------------|------------|------------------------------------------------------------------------------------------|
|                       |            |            |            |            | Eticka komise<br>Revmatologicky ustav<br>Na Slupi 4<br>Praha 2, 128 50<br>CZECH REPUBLIC |
|                       |            |            |            |            | Eticka komise IKEM a FTNsP<br>Videnska 800<br>Praha 4 Krc, 140 59<br>CZECH REPUBLIC      |
| 1119                  | [REDACTED] |            | [REDACTED] | [REDACTED] | Eticka komise FN Brno<br>Jihlavská 20<br>Brno, 625 00<br>CZECH REPUBLIC                  |
|                       |            |            |            |            | Eticka komise IKEM a FTNsP<br>Videnska 800<br>Praha 4 Krc, 140 59<br>CZECH REPUBLIC      |
| 1120                  | [REDACTED] |            | [REDACTED] | [REDACTED] | Eticka komise IKEM a FTNsP<br>Videnska 800<br>Praha 4 Krc, 140 59<br>CZECH REPUBLIC      |
| 1123                  | [REDACTED] |            | [REDACTED] | [REDACTED] | Eticka komise IKEM a FTNsP<br>Videnska 800<br>Praha 4 Krc, 140 59<br>CZECH REPUBLIC      |

090177e1817606c9\Approved\Approved On: 12-Nov-2010 07:08 (GMT)

**Dominican Republic**

**Coordinating Investigators:**

<None Entered>

**Center**

1020

[REDACTED]

**Institutional Review Board or  
Ethics Committee Address(es)**

CONABIOS  
Universidad Católica Santo Domingo  
Calle Santo Domingo No3, Ens. La  
Julia  
Santo Domingo, Santo Domingo  
2733  
DOMINICAN REPUBLIC

090177e1817606c9\Approved\Approved On: 12-Nov-2010 07:08 (GMT)

**Germany**

**Coordinating Investigators:**

<None Entered>

| <u>Center</u> |            |            |            |            | <u>Institutional Review Board or Ethics Committee Address(es)</u>                                                           |
|---------------|------------|------------|------------|------------|-----------------------------------------------------------------------------------------------------------------------------|
| 1066          | [REDACTED] | [REDACTED] | [REDACTED] | [REDACTED] | Ethik-Kommission an der Medizinischen Fakultät der Universität Leipzig<br>Haertelstrasse 16-18<br>Leipzig, 04107<br>GERMANY |
| 1067          | [REDACTED] | [REDACTED] | [REDACTED] | [REDACTED] | Ethik-Kommission an der Medizinischen Fakultät der Universität Leipzig<br>Haertelstrasse 16-18<br>Leipzig, 04107<br>GERMANY |
| 1068          | [REDACTED] | [REDACTED] | [REDACTED] | [REDACTED] | Ethik-Kommission an der Medizinischen Fakultät der Universität Leipzig<br>Haertelstrasse 16-18<br>Leipzig, 04107<br>GERMANY |
| 1069          | [REDACTED] | [REDACTED] | [REDACTED] | [REDACTED] | Ethik-Kommission an der Medizinischen Fakultät der Universität Leipzig<br>Haertelstrasse 16-18<br>Leipzig, 04107<br>GERMANY |

090177e1817606c9\Approved\Approved On: 12-Nov-2010 07:08 (GMT)

| <u>Center</u> |            |            |            |            | <u>Institutional Review Board or Ethics Committee Address(es)</u>                                                           |
|---------------|------------|------------|------------|------------|-----------------------------------------------------------------------------------------------------------------------------|
| 1070          | [REDACTED] | [REDACTED] | [REDACTED] | [REDACTED] | Ethik-Kommission an der Medizinischen Fakultät der Universität Leipzig<br>Haertelstrasse 16-18<br>Leipzig, 04107<br>GERMANY |
| 1137          | [REDACTED] |            | [REDACTED] | [REDACTED] | Ethik-Kommission an der Medizinischen Fakultät der Universität Leipzig<br>Haertelstrasse 16-18<br>Leipzig, 04107<br>GERMANY |

090177e1817606c9\Approved\Approved On: 12-Nov-2010 07:08 (GMT)

**India**

**Coordinating Investigators:**

<None Entered>

| <u>Center</u> |            |            |            |            | <u>Institutional Review Board or Ethics Committee Address(es)</u>                                                                                                                                                       |
|---------------|------------|------------|------------|------------|-------------------------------------------------------------------------------------------------------------------------------------------------------------------------------------------------------------------------|
| 1030          | [REDACTED] | [REDACTED] | [REDACTED] | [REDACTED] | Institutional Ethical Review Board<br>St. John's Medical College and Hospital<br>Sarjapur Road<br>Bangalore, Karnataka 560 034<br>INDIA                                                                                 |
| 1031          | [REDACTED] | [REDACTED] | [REDACTED] | [REDACTED] | Ethical Committee, Bangalore<br>Medical College & Research Institute<br>K.R. Road,<br>Fort,<br>Bangalore, Karnataka 560 002<br>INDIA                                                                                    |
| 1032          | [REDACTED] | [REDACTED] | [REDACTED] | [REDACTED] | Institutional Ethical Committee<br>Chanre Rheumatology &<br>Immunology Centre & Research<br>#149, 15th Main NHCL, Water Tank<br>Road, 4th Block, 3rd Stage<br>Basaveswaranagar<br>Bangalore, Karnataka 560 079<br>INDIA |
| 1033 *        | [REDACTED] | [REDACTED] | [REDACTED] | [REDACTED] | Hirabai Cowasji Jehangir Medical<br>Research Institute and Jehangir<br>Clinical Development Center<br>Ethics Committee<br>Jehangir Hospital,<br>32, Sassoon Road,<br>Pune, Maharashtra 411 001<br>INDIA                 |

090177e1817606c9Approved\Approved On: 12-Nov-2010 07:08 (GMT)

\* Did not randomize subjects



090177e1817606c9\Approved\Approved On: 12-Nov-2010 07:08 (GMT)

| <u>Center</u> |            |            |            | <u>Institutional Review Board or Ethics Committee Address(es)</u>                                                                                          |
|---------------|------------|------------|------------|------------------------------------------------------------------------------------------------------------------------------------------------------------|
| 1035          | [REDACTED] | [REDACTED] | [REDACTED] | Institutional Ethics Committee<br>Krishna Institute of Medical Sciences Ltd.<br>1-8-31/1, Minister Road<br>Secunderabad, Andra Pradesh<br>500003<br>INDIA  |
| 1038          | [REDACTED] | [REDACTED] | [REDACTED] | CRD Ethics Committee<br>11, Hermes Elegance<br>1988, Convent Street Camp<br>Pune, Maharashtra 411 001<br>INDIA                                             |
| 1088          | [REDACTED] | [REDACTED] | [REDACTED] | Ethics Committee Shalby Hospitals<br>Shalby Hospitals<br>Opp. Karnavati Club,<br>S. G. Road, P. O. Ambawadi Vistar,<br>Ahmedabad, Gujarat 380 015<br>INDIA |

| <u>Center</u> |            |            |            | <u>Institutional Review Board or Ethics Committee Address(es)</u>                                                                           |
|---------------|------------|------------|------------|---------------------------------------------------------------------------------------------------------------------------------------------|
| 1099          | [REDACTED] | [REDACTED] | [REDACTED] | Manipal University Ethics Cimmittee<br>Madhav Nagar<br>Manipal, karnataka 576 104<br>INDIA                                                  |
| 1114          | [REDACTED] | [REDACTED] | [REDACTED] | Institutional Ethics Committee<br>Father Muller Medical College<br>Father Muller Road<br>Kankanady<br>Mangalore, Karnataka 575 002<br>INDIA |
| 1128          | [REDACTED] | [REDACTED] | [REDACTED] | Ethics Committee<br>Sri Deepti Rheumatology Centre<br>6-2-45/8,<br>A. C. Guards,<br>Hyderabad, Andhra Pradesh 500 004<br>INDIA              |

090177e1817606c9\Approved\Approved On: 12-Nov-2010 07:08 (GMT)

Center  
1130

[REDACTED]

[REDACTED]

[REDACTED]

**Institutional Review Board or  
Ethics Committee Address(es)**

Institutional Ethical Committee for  
Bio Medical Research  
Bhagwan Mahavir Medical Research  
Center, Mahavir Hospital &  
Research Center,  
10-1-1, Bhagwan Mahavir Marg,  
A.C. Guards,  
Hyderabad, Andhra Pradesh 500 004  
INDIA

090177e1817606c9\Approved\Approved On: 12-Nov-2010 07:08 (GMT)

Malaysia

Coordinating Investigators:

<None Entered>

Center

1058

[Redacted]

[Redacted]

[Redacted]

[Redacted]

**Institutional Review Board or Ethics Committee Address(es)**

Medical Research & Ethics Committee  
Ministry of Health, c/o NIH Secretariat, Institute for Health Management  
Jalan Rumah Sakit  
Bangsar  
Kuala Lumpur, 59000  
MALAYSIA

1060

[Redacted]

[Redacted]

[Redacted]

Medical Research & Ethics Committee  
Ministry of Health, c/o NIH Secretariat, Institute for Health Management  
Jalan Rumah Sakit  
Bangsar  
Kuala Lumpur, 59000  
MALAYSIA

1079

[Redacted]

[Redacted]

[Redacted]

Medical Research & Ethics Committee  
Ministry of Health, c/o NIH Secretariat, Institute for Health Management  
Jalan Rumah Sakit  
Bangsar  
Kuala Lumpur, 59000  
MALAYSIA

090177e1817606c9\Approved\Approved On: 12-Nov-2010 07:08 (GMT)

Center  
1080

[REDACTED]

**Institutional Review Board or  
Ethics Committee Address(es)**

Medical Research & Ethics  
Committee  
Ministry of Health, c/o NIH  
Secretariat, Institute for Health  
Management  
Jalan Rumah Sakit  
Bangsar  
Kuala Lumpur, 59000  
MALAYSIA

090177e1817606c9\Approved\Approved On: 12-Nov-2010 07:08 (GMT)

**Mexico**

**Coordinating Investigators:**

<None Entered>

| <u>Center</u> |            |            |            | <u>Institutional Review Board or Ethics Committee Address(es)</u>                                                                                                                                                             |
|---------------|------------|------------|------------|-------------------------------------------------------------------------------------------------------------------------------------------------------------------------------------------------------------------------------|
| 1053          | [REDACTED] | [REDACTED] | [REDACTED] | Comite de Etica e Investigacion del Hospital Christus Muguerza del Parque<br>Calle Dr. Pedro Leal Rodriguez y de la Llave<br>Chihuahua, Chihuahua 31000<br>MEXICO                                                             |
| 1055          | [REDACTED] | [REDACTED] | [REDACTED] | Comite de Etica Facultad de Medicina de la UANL y Hospital Universitario Dr. Jose Eleuterio Gonzalez<br>Av. Francisco I Madero Pte s/n y Dr. E Aguirre Pequeno<br>Col. Mitras Centro<br>Monterrey, Nuevo Leon 64460<br>MEXICO |
| 1056          | [REDACTED] | [REDACTED] | [REDACTED] | Comite de Bioetica de la Unidad de Investigacion en Enfermedades Cronico-Degenerativas<br>Colomos 2292<br>Col. Providencia<br>Guadalajara, Jalisco 44620<br>MEXICO                                                            |
| 1057          | [REDACTED] | [REDACTED] | [REDACTED] | Comision de Investigacion y Etica Centro Medico Nova<br>Avenida Guadalupe Victoria 9308<br>Zona Rio<br>Tijuana, Baja California 22010<br>MEXICO                                                                               |

090177e1817606c9\Approved\Approved On: 12-Nov-2010 07:08 (GMT)

**Philippines**

**Coordinating Investigators:**

<None Entered>

**Center**

1047

[REDACTED]

**Institutional Review Board or Ethics Committee Address(es)**

Institutional Review Board  
3rd Floor, Clinical Division Building  
University of Sto. Tomas Hospital  
España Blvd.  
Manila, 1008  
PHILIPPINES

1048

[REDACTED]

Institutional Ethics Review Board  
Institutional Ethics Review Board  
University of Perpetual Help System-  
DALTA 7th Floor Research Room  
Alabang-Zapote Road  
Las Piñas City, 1742  
PHILIPPINES

1049

[REDACTED]

DLS Institutional Review Board  
Room 6301  
De La Salle Angelo King Medical  
Research Center  
Congressional Avenue  
Dasmariñas, Cavite 4114  
PHILIPPINES

090177e1817606c9\Approved\Approved On: 12-Nov-2010 07:08 (GMT)

Center  
1050

[REDACTED]

[REDACTED]

[REDACTED]

**Institutional Review Board or  
Ethics Committee Address(es)**

Ethics Committee  
Southern Philippines Medical Center  
Bajada, Davao City, 8000  
PHILIPPINES

090177e1817606c9\Approved\Approved On: 12-Nov-2010 07:08 (GMT)



**Poland**

**Coordinating Investigators:**

<None Entered>

**Center**

**Institutional Review Board or  
Ethics Committee Address(es)**

1021

[REDACTED]

Komisja Bioetyczna przy Okregowej  
Izbie Lekarskiej w Warszawie  
ul. Pulawska 18  
Warszawa, 02-512  
POLAND

1022

[REDACTED]

Komisja Bioetyczna przy Okregowej  
Izbie Lekarskiej w Warszawie  
ul. Pulawska 18  
Warszawa, 02-512  
POLAND

090177e1817606c9\Approved\Approved On: 12-Nov-2010 07:08 (GMT)

**Russian Federation**

**Coordinating Investigators:**

<None Entered>

**Center**

1100

[Redacted]

**Institutional Review Board or Ethics Committee Address(es)**

Ethics Committee at the Federal Service on Surveillance in Healthcare and Social Development  
8, str. 2, Petrovskij bulvar  
Moscow, 127051  
RUSSIAN FEDERATION

Independent Ethics Committee of State Educational Institution of High Professional Education  
"Smolensk State Medical Academy of Federal Agency of Healthcare and Social Development"  
28, ul. Krupskoj, 214019  
27, pr. Gagarina  
Smolensk, 214018  
RUSSIAN FEDERATION

1127

[Redacted]

Ethics Committee at the Federal Service on Surveillance in Healthcare and Social Development  
8, str. 2, Petrovskij bulvar  
Moscow, 127051  
RUSSIAN FEDERATION

090177e1817606c9\Approved\Approved On: 12-Nov-2010 07:08 (GMT)

Ukraine

Coordinating Investigators:

<None Entered>

Center

1082

[Redacted]

[Redacted]

[Redacted]

[Redacted]

**Institutional Review Board or Ethics Committee Address(es)**

Central Ethics Committee Ministry of Health of Ukraine  
5, Narodnogo Opolchennya Str.  
Kyiv, 03680  
UKRAINE

Committee for Ethics Issues of City Clinical Hospital #8  
266g, Saltivske Shosse  
Kharkiv, 61178  
UKRAINE

1083

[Redacted]

[Redacted]

[Redacted]

Bioethics Committee of Vinnitsa Regional Clinical Hospital n.a.  
Pirogov  
46 Pirogova Street  
Vinnitsa, 21018  
UKRAINE

Central Ethics Committee Ministry of Health of Ukraine  
5, Narodnogo Opolchennya Str.  
Kyiv, 03680  
UKRAINE

090177e1817606c9\Approved\Approved On: 12-Nov-2010 07:08 (GMT)

090177e1817606c9\Approved\Approved On: 12-Nov-2010 07:08 (GMT)

| <u>Center</u><br>1084 | [REDACTED] | [REDACTED] | [REDACTED] | [REDACTED] | <b><u>Institutional Review Board or Ethics Committee Address(es)</u></b>                                                                                                                                                                          |
|-----------------------|------------|------------|------------|------------|---------------------------------------------------------------------------------------------------------------------------------------------------------------------------------------------------------------------------------------------------|
| 1084                  | [REDACTED] | [REDACTED] | [REDACTED] | [REDACTED] | Central Ethics Committee Ministry of Health of Ukraine<br>5, Narodnogo Opolchennya Str.<br>Kyiv, 03680<br>UKRAINE<br><br>Committee for Ethics Issues of Institute of Gerontology<br>67, Vyshgorodska Street<br>Kyiv, 04114<br>UKRAINE             |
| 1085                  | [REDACTED] | [REDACTED] | [REDACTED] | [REDACTED] | Central Ethics Committee Ministry of Health of Ukraine<br>5, Narodnogo Opolchennya Str.<br>Kyiv, 03680<br>UKRAINE<br><br>Committee for Ethics Issues of Municipal City Clinical Hospital #4<br>3 Svetsitskogo Str<br>Lviv, 79011<br>UKRAINE       |
| 1086                  | [REDACTED] | [REDACTED] | [REDACTED] | [REDACTED] | Central Ethics Committee Ministry of Health of Ukraine<br>5, Narodnogo Opolchennya Str.<br>Kyiv, 03680<br>UKRAINE<br><br>Committee for Ethics Issues of Republican Clinical Hospital<br>69, Kyivska Street<br>Simferopol, Crimea 95017<br>UKRAINE |

**United States**

**Coordinating Investigators:**

<None Entered>

**Center**

**Institutional Review Board or  
Ethics Committee Address(es)**

1002

[REDACTED]

Quorum Institutional Review Board  
Suite 1000  
1601 Fifth Avenue  
Seattle, WA 98101  
UNITED STATES

1003

[REDACTED]

Quorum Institutional Review Board  
Suite 1000  
1601 Fifth Avenue  
Seattle, WA 98101  
UNITED STATES

1004

[REDACTED]

Quorum Institutional Review Board  
Suite 1000  
1601 Fifth Avenue  
Seattle, WA 98101  
UNITED STATES

090177e1817606c9\Approved\Approved On: 12-Nov-2010 07:08 (GMT)

| <u>Center</u> |            |            |            |            | <u>Institutional Review Board or Ethics Committee Address(es)</u>                                          |
|---------------|------------|------------|------------|------------|------------------------------------------------------------------------------------------------------------|
| 1005          | [REDACTED] | [REDACTED] | [REDACTED] | [REDACTED] | Quorum Institutional Review Board<br>Suite 1000<br>1601 Fifth Avenue<br>Seattle, WA 98101<br>UNITED STATES |
| 1006          | [REDACTED] |            | [REDACTED] | [REDACTED] | Quorum Institutional Review Board<br>Suite 1000<br>1601 Fifth Avenue<br>Seattle, WA 98101<br>UNITED STATES |
| 1007          | [REDACTED] |            | [REDACTED] | [REDACTED] | Quorum Institutional Review Board<br>Suite 1000<br>1601 Fifth Avenue<br>Seattle, WA 98101<br>UNITED STATES |
| 1008          | [REDACTED] |            | [REDACTED] | [REDACTED] | Quorum Institutional Review Board<br>Suite 1000<br>1601 Fifth Avenue<br>Seattle, WA 98101<br>UNITED STATES |

090177e1817606c9\Approved\Approved On: 12-Nov-2010 07:08 (GMT)

| <u>Center</u> |            |            |            | <u>Institutional Review Board or Ethics Committee Address(es)</u>                                          |
|---------------|------------|------------|------------|------------------------------------------------------------------------------------------------------------|
| 1009          | [REDACTED] | [REDACTED] | [REDACTED] | Quorum Institutional Review Board<br>Suite 1000<br>1601 Fifth Avenue<br>Seattle, WA 98101<br>UNITED STATES |
| 1010          | [REDACTED] | [REDACTED] | [REDACTED] | Quorum Institutional Review Board<br>Suite 1000<br>1601 Fifth Avenue<br>Seattle, WA 98101<br>UNITED STATES |
| 1011          | [REDACTED] | [REDACTED] | [REDACTED] | Western Institutional Review Board<br>3535 Seventh Avenue Southwest<br>Olympia, WA 98502<br>UNITED STATES  |

090177e1817606c9\Approved\Approved On: 12-Nov-2010 07:08 (GMT)

| <u>Center</u> |            |            |            | <u>Institutional Review Board or Ethics Committee Address(es)</u>                                          |                                                                                                            |
|---------------|------------|------------|------------|------------------------------------------------------------------------------------------------------------|------------------------------------------------------------------------------------------------------------|
| 1012          | [REDACTED] | [REDACTED] | [REDACTED] | [REDACTED]                                                                                                 | Quorum Institutional Review Board<br>Suite 1000<br>1601 Fifth Avenue<br>Seattle, WA 98101<br>UNITED STATES |
| 1013          | [REDACTED] | [REDACTED] | [REDACTED] | Quorum Institutional Review Board<br>Suite 1000<br>1601 Fifth Avenue<br>Seattle, WA 98101<br>UNITED STATES |                                                                                                            |
| 1014          | [REDACTED] | [REDACTED] | [REDACTED] | Quorum Institutional Review Board<br>Suite 1000<br>1601 Fifth Avenue<br>Seattle, WA 98101<br>UNITED STATES |                                                                                                            |
| 1015          | [REDACTED] | [REDACTED] | [REDACTED] | Quorum Institutional Review Board<br>Suite 1000<br>1601 Fifth Avenue<br>Seattle, WA 98101<br>UNITED STATES |                                                                                                            |

090177e1817606c9\Approved\Approved On: 12-Nov-2010 07:08 (GMT)



Center

1016

[REDACTED]

Institutional Review Board or  
Ethics Committee Address(es)

Quorum Institutional Review Board  
Suite 1000  
1601 Fifth Avenue  
Seattle, WA 98101  
UNITED STATES

1017

[REDACTED]

Quorum Institutional Review Board  
Suite 1000  
1601 Fifth Avenue  
Seattle, WA 98101  
UNITED STATES

090177e1817606c9\Approved\Approved On: 12-Nov-2010 07:08 (GMT)

| <u>Center</u> |            |            |            |            | <u>Institutional Review Board or Ethics Committee Address(es)</u>                                          |
|---------------|------------|------------|------------|------------|------------------------------------------------------------------------------------------------------------|
| 1018          | [REDACTED] | [REDACTED] | [REDACTED] | [REDACTED] | Quorum Institutional Review Board<br>Suite 1000<br>1601 Fifth Avenue<br>Seattle, WA 98101<br>UNITED STATES |
| 1024          | [REDACTED] | [REDACTED] | [REDACTED] | [REDACTED] | Quorum Institutional Review Board<br>Suite 1000<br>1601 Fifth Avenue<br>Seattle, WA 98101<br>UNITED STATES |
| 1025          | [REDACTED] | [REDACTED] | [REDACTED] | [REDACTED] | Quorum Institutional Review Board<br>Suite 1000<br>1601 Fifth Avenue<br>Seattle, WA 98101<br>UNITED STATES |
| 1026          | [REDACTED] | [REDACTED] | [REDACTED] | [REDACTED] | Quorum Institutional Review Board<br>Suite 1000<br>1601 Fifth Avenue<br>Seattle, WA 98101<br>UNITED STATES |
| 1027          | [REDACTED] | [REDACTED] | [REDACTED] | [REDACTED] | Quorum Institutional Review Board<br>Suite 1000<br>1601 Fifth Avenue<br>Seattle, WA 98101<br>UNITED STATES |

090177e1817606c9\Approved\Approved On: 12-Nov-2010 07:08 (GMT)

| <u>Center</u> |            |            |            |            | <u>Institutional Review Board or Ethics Committee Address(es)</u>                                          |
|---------------|------------|------------|------------|------------|------------------------------------------------------------------------------------------------------------|
| 1028          | [REDACTED] | [REDACTED] | [REDACTED] | [REDACTED] | Quorum Institutional Review Board<br>Suite 1000<br>1601 Fifth Avenue<br>Seattle, WA 98101<br>UNITED STATES |
| 1036          | [REDACTED] | [REDACTED] | [REDACTED] | [REDACTED] | Quorum Institutional Review Board<br>Suite 1000<br>1601 Fifth Avenue<br>Seattle, WA 98101<br>UNITED STATES |
| 1037 *        | [REDACTED] | [REDACTED] | [REDACTED] | [REDACTED] | Quorum Institutional Review Board<br>Suite 1000<br>1601 Fifth Avenue<br>Seattle, WA 98101<br>UNITED STATES |
| 1039          | [REDACTED] | [REDACTED] | [REDACTED] | [REDACTED] | Quorum Institutional Review Board<br>Suite 1000<br>1601 Fifth Avenue<br>Seattle, WA 98101<br>UNITED STATES |
| 1040          | [REDACTED] | [REDACTED] | [REDACTED] | [REDACTED] | St. Joseph's Mercy Health Center<br>IRB<br>100 McAuley Court<br>Hot Springs, AR 71903<br>UNITED STATES     |

090177e1817606c9\Approved\Approved On: 12-Nov-2010 07:08 (GMT)

\* Did not randomize subjects

| <u>Center</u> |            |            |            | <u>Institutional Review Board or Ethics Committee Address(es)</u>                                                                            |
|---------------|------------|------------|------------|----------------------------------------------------------------------------------------------------------------------------------------------|
| 1041          | [REDACTED] | [REDACTED] | [REDACTED] | Quorum Institutional Review Board<br>Suite 1000<br>1601 Fifth Avenue<br>Seattle, WA 98101<br>UNITED STATES                                   |
| 1052          | [REDACTED] | [REDACTED] | [REDACTED] | Baylor Research Institute<br>Institutional Review Board<br>White/Blue/Red<br>Suite 501<br>3310 Live Oak<br>Dallas, TX 75204<br>UNITED STATES |
| 1071          | [REDACTED] | [REDACTED] | [REDACTED] | Trinity IRB<br>Institutional Review Board<br>One Burdick Expressway West<br>Minot, ND 58701<br>UNITED STATES                                 |
| 1076          | [REDACTED] | [REDACTED] | [REDACTED] | Quorum Institutional Review Board<br>Suite 1000<br>1601 Fifth Avenue<br>Seattle, WA 98101<br>UNITED STATES                                   |

090177e1817606c9\Approved\Approved On: 12-Nov-2010 07:08 (GMT)

Center  
1077 \*

[REDACTED]

[REDACTED]

[REDACTED]

**Institutional Review Board or  
Ethics Committee Address(es)**  
Quorum Institutional Review Board  
Suite 1000  
1601 Fifth Avenue  
Seattle, WA 98101  
UNITED STATES

1078

[REDACTED]

[REDACTED]

[REDACTED]

Quorum Institutional Review Board  
Suite 1000  
1601 Fifth Avenue  
Seattle, WA 98101  
UNITED STATES

090177e1817606c9\Approved\Approved On: 12-Nov-2010 07:08 (GMT)

**16.1.4.1 LIST OF INVESTIGATORS AND CORRESPONDING ETHICS COMMITTEES OR INSTITUTIONAL REVIEW BOARDS**

**Argentina**

**Coordinating Investigators:**

<None Entered>

| <u>Center</u> |            |            |            | <u>Institutional Review Board or Ethics Committee Address(es)</u>                                                                                                                                                                                                                                                                                                                                                                                                                                                      |
|---------------|------------|------------|------------|------------------------------------------------------------------------------------------------------------------------------------------------------------------------------------------------------------------------------------------------------------------------------------------------------------------------------------------------------------------------------------------------------------------------------------------------------------------------------------------------------------------------|
| 1106          | [REDACTED] | [REDACTED] | [REDACTED] | <p>Comite de Investigacion y Etica de Saint Dennis Medical Group S. A.<br/>                     Av. Rivadavia 2206- 6°A<br/>                     Buenos Aires, C1034ACO<br/>                     ARGENTINA</p> <p>Comite Independiente de Etica para Ensayos en Farmacologia Clinica<br/>                     Fundación de Estudios Farmacologicos y de Medicamentos (FEFyM)<br/>                     J.E. Uriburu 774- Piso 1°<br/>                     Buenos Aires, C1027AAP<br/>                     ARGENTINA</p> |
| 1107          | [REDACTED] | [REDACTED] | [REDACTED] | <p>Comite Independiente de Etica para Ensayos en Farmacologia Clinica<br/>                     Fundación de Estudios Farmacologicos y de Medicamentos (FEFyM)<br/>                     J.E. Uriburu 774- Piso 1°<br/>                     Buenos Aires, C1027AAP<br/>                     ARGENTINA</p>                                                                                                                                                                                                                |

090177e183a72a9c\Approved\Approved On: 10-Oct-2012 02:11 (GMT)

Center  
1108

[REDACTED]

[REDACTED]

[REDACTED]

**Institutional Review Board or  
Ethics Committee Address(es)**

Comite Independiente de Etica para  
Ensayos en Farmacologia Clinica  
Fundación de Estudios  
Farmacologicos y de Medicamentos  
(FEFyM)  
J.E. Uriburu 774- Piso 1°  
Buenos Aires, C1027AAP  
ARGENTINA

090177e183a72a9c\Approved\Approved On: 10-Oct-2012 02:11 (GMT)

**Australia**

**Coordinating Investigators:**

<None Entered>

| <u>Center</u> |            |            |            |            | <u>Institutional Review Board or Ethics Committee Address(es)</u>                                                                                                            |
|---------------|------------|------------|------------|------------|------------------------------------------------------------------------------------------------------------------------------------------------------------------------------|
| 1158          | [REDACTED] | [REDACTED] | [REDACTED] | [REDACTED] | Cabrini Human Research Committee<br>Cabrini Institute<br>183 Wattleree Road<br>Malvern, VIC 3144<br>AUSTRALIA                                                                |
| 1159          | [REDACTED] | [REDACTED] | [REDACTED] | [REDACTED] | Bellberry Limited Human Research<br>Ethics Committee<br>229 Greenhill Road<br>Dulwich, SA 5065<br>AUSTRALIA                                                                  |
| 1160          | [REDACTED] | [REDACTED] | [REDACTED] | [REDACTED] | Central Northern Adelaide Health<br>Service<br>Ethics of Human Research<br>Committee<br>The Queen Elizabeth Hospital<br>28 Woodville Road<br>Woodville, SA 5011<br>AUSTRALIA |

090177e183a72a9c\Approved\Approved On: 10-Oct-2012 02:11 (GMT)



**Belgium**

**Coordinating Investigators:**

<None Entered>

**Center**

1167

[REDACTED]

**Institutional Review Board or  
Ethics Committee Address(es)**

Universitair Ziekenhuis Gent,  
Ethisch Comite  
De Pintelaan 185  
Gent, 9000  
BELGIUM

090177e183a72a9c\Approved\Approved On: 10-Oct-2012 02:11 (GMT)

**Brazil**

**Coordinating Investigators:**

<None Entered>

**Center**

1048

[REDACTED]

[REDACTED]

[REDACTED]

**Institutional Review Board or Ethics Committee Address(es)**

Comite de Etica em Pesquisa do Hospital Geral de Goiania - CEPHGG  
Avenida Anhanguera, 6479  
Setor Oeste  
Goiania, GO 74110-010  
BRAZIL

1054

[REDACTED]

[REDACTED]

Comitê de Ética em Pesquisa em Seres Humanos Hospital de Clínicas da UFPR  
Rua General Carneiro 181  
Curitiba, PR 80060-900  
BRAZIL

090177e183a72a9c\Approved\Approved On: 10-Oct-2012 02:11 (GMT)

Center  
1055

[REDACTED]

[REDACTED]

[REDACTED]

**Institutional Review Board or  
Ethics Committee Address(es)**  
Comite de Etica em Pesquisa da  
Pontificia Universidade Catolica do  
Rio Grande do Sul  
Av. Ipiranga 6690-Conj.314 -3 andar  
Jardim Botânico  
Porto Alegre, RS 90610-000  
BRAZIL

1066

[REDACTED]

[REDACTED]

[REDACTED]

Comite de Etica em Pesquisa do  
Complexo Hospitalar Heliopolis  
Rua Conego Xavier, 276 - 10º andar  
Sacoma  
Sao Paulo, SP 04231-030  
BRAZIL

090177e183a72a9c\Approved\Approved On: 10-Oct-2012 02:11 (GMT)

Center  
1142

[REDACTED]

[REDACTED]

[REDACTED]

**Institutional Review Board or  
Ethics Committee Address(es)**

Comite de Etica em Pesquisa do  
Hospital Pro Cardiaco Pronto Socorro  
Cardiologico/PROCEP  
Rua Paulo Barreto, 86  
Botafogo, Rio de Janeiro/RJ 22280-  
010  
BRAZIL

090177e183a72a9c\Approved\Approved On: 10-Oct-2012 02:11 (GMT)

**Bulgaria**

**Coordinating Investigators:**

<None Entered>

**Center**

1060

[Redacted]

**Institutional Review Board or Ethics Committee Address(es)**

Ethics Committee for Multicenter Trials  
pl. Sveta Nedelya 5  
Sofia, 1000  
BULGARIA

Komisiya po etika pri MBAL-Plovdiv/Ethics Committee at MHAT-Plovdiv  
MBAL-Plovdiv  
MHAT-Plovdiv  
bul. ĳBulgariaĳ 234  
Plovdiv, 4000  
BULGARIA

1061

[Redacted]

Ethics Committee for Multicenter Trials  
pl. Sveta Nedelya 5  
Sofia, 1000  
BULGARIA

Komisiya po etika pri DKTs"Sv. Anna"/ Ethics Committee at DCC "Sv. Anna"  
DKTs "Sveta Anna"  
Diagnostic Consultative Center "Sveta Anna"  
Ul. Dimitar Mollov 1  
Sofia, 1709  
BULGARIA

090177e183a72a9c\Approved\Approved On: 10-Oct-2012 02:11 (GMT)

| <u>Center</u> |            |            |            | <u>Institutional Review Board or Ethics Committee Address(es)</u>                                                                                                                                                                                                                                      |
|---------------|------------|------------|------------|--------------------------------------------------------------------------------------------------------------------------------------------------------------------------------------------------------------------------------------------------------------------------------------------------------|
| 1084          | [REDACTED] | [REDACTED] | [REDACTED] | Ethics Committee for Multicenter Trials<br>pl. Sveta Nedelya 5<br>Sofia, 1000<br>BULGARIA<br><br>Komisiya po etika pri MBAL "Sveti Ivan Rilski"/Ethics Committee at MHAT "Sveti Ivan Rilski"<br>MBAL "Sveti Ivan Rilski" Sofia<br>MHAT "Sveti Ivan Rilski"<br>Ul. Urvich 13<br>Sofia, 1612<br>BULGARIA |
| 1114          | [REDACTED] | [REDACTED] | [REDACTED] | Ethics Committee for Multicenter Trials<br>pl. Sveta Nedelya 5<br>Sofia, 1000<br>BULGARIA<br><br>Komisiya po etika pri MOBAL "D-r Stefan Cherkeзов" AD<br>MOBAL "D-r Stefan Cherkeзов" AD<br>MHAT "Dr. Stefan Cherkeзов" AD<br>ul. Nish<br>1<br>Veliko Tarnovo, 5000<br>BULGARIA                       |

090177e183a72a9c\Approved\Approved On: 10-Oct-2012 02:11 (GMT)

| <u>Center</u> |            |            |            | <u>Institutional Review Board or Ethics Committee Address(es)</u>                                                                                                                                                                                                                                                                                                                    |
|---------------|------------|------------|------------|--------------------------------------------------------------------------------------------------------------------------------------------------------------------------------------------------------------------------------------------------------------------------------------------------------------------------------------------------------------------------------------|
| 1115          | [REDACTED] | [REDACTED] | [REDACTED] | <p>Ethics Committee for Multicenter Trials<br/>           pl. Sveta Nedelya 5<br/>           Sofia, 1000<br/>           BULGARIA</p> <p>Komisiya po etika pri MBAL-Ruse, AD<br/>           MBAL-Ruse, AD<br/>           MHAT Ruse<br/>           2 ul. Nezavisimost<br/>           Ruse, 7002<br/>           BULGARIA</p>                                                            |
| 1137          | [REDACTED] | [REDACTED] | [REDACTED] | <p>Ethics Committee for Multicenter Trials<br/>           ul. "Damyana Gruev" 8<br/>           Sofia, 1303<br/>           BULGARIA</p> <p>Komisiya po etika pri MBAL na Voennomeditsinska Akademia - Sofia/Ethics Committee at MMA HAT-Sofia<br/>           MMA HAT-Sofia<br/>           Ul. Georgi Sofiyski<br/>           3<br/>           Sofia, 1606<br/>           BULGARIA</p> |

090177e183a72a9c\Approved\Approved On: 10-Oct-2012 02:11 (GMT)

Canada

Coordinating Investigators:

<None Entered>

| <u>Center</u> |            |            |            | <u>Institutional Review Board or Ethics Committee Address(es)</u>                  |
|---------------|------------|------------|------------|------------------------------------------------------------------------------------|
| 1039          | [REDACTED] | [REDACTED] | [REDACTED] | IRB Services<br>Suite 300<br>372 Hollandview Trail<br>Aurora, ON L4G 0A5<br>CANADA |
| 1040          | [REDACTED] | [REDACTED] | [REDACTED] | IRB Services<br>Suite 300<br>372 Hollandview Trail<br>Aurora, ON L4G 0A5<br>CANADA |
| 1041          | [REDACTED] | [REDACTED] | [REDACTED] | IRB Services<br>Suite 300<br>372 Hollandview Trail<br>Aurora, ON L4G 0A5<br>CANADA |
| 1042          | [REDACTED] | [REDACTED] | [REDACTED] | IRB Services<br>Suite 300<br>372 Hollandview Trail<br>Aurora, ON L4G 0A5<br>CANADA |

090177e183a72a9c\Approved\Approved On: 10-Oct-2012 02:11 (GMT)



090177e183a72a9c\Approved\Approved On: 10-Oct-2012 02:11 (GMT)

| <u>Center</u> |            |            |            |            | <u>Institutional Review Board or Ethics Committee Address(es)</u>                                                                                 |
|---------------|------------|------------|------------|------------|---------------------------------------------------------------------------------------------------------------------------------------------------|
| 1053          | [REDACTED] | [REDACTED] | [REDACTED] | [REDACTED] | IRB Services<br>Suite 300<br>372 Hollandview Trail<br>Aurora, ON L4G 0A5<br>CANADA                                                                |
| 1123          | [REDACTED] |            | [REDACTED] | [REDACTED] | Alberta Innovates - Health Solutions<br>Research Ethics Review Committee<br>Suite 1500<br>10104 - 103 Avenue NW<br>Edmonton, AB T5J 4A7<br>CANADA |
| 1124          | [REDACTED] |            | [REDACTED] | [REDACTED] | IRB Services<br>Suite 300<br>372 Hollandview Trail<br>Aurora, ON L4G 0A5<br>CANADA                                                                |
| 1125          | [REDACTED] |            | [REDACTED] | [REDACTED] | IRB Services<br>Suite 300<br>372 Hollandview Trail<br>Aurora, ON L4G 0A5<br>CANADA                                                                |
| 1126          | [REDACTED] |            | [REDACTED] | [REDACTED] | IRB Services<br>Suite 300<br>372 Hollandview Trail<br>Aurora, ON L4G 0A5<br>CANADA                                                                |

Center  
1177

[REDACTED]

[REDACTED]

[REDACTED]

**Institutional Review Board or  
Ethics Committee Address(es)**

IRB Services  
Suite 300  
372 Hollandview Trail  
Aurora, ON L4G 0A5  
CANADA

090177e183a72a9c\Approved\Approved On: 10-Oct-2012 02:11 (GMT)

Chile

Coordinating Investigators:

<None Entered>

| Center |            |            |            | <u>Institutional Review Board or Ethics Committee Address(es)</u>                                                                        |
|--------|------------|------------|------------|------------------------------------------------------------------------------------------------------------------------------------------|
| 1070   | [REDACTED] | [REDACTED] | [REDACTED] | Comite Etico Cientifico del Servicio de Salud Vina-Quillota<br>Calle Limache 1307<br>2° Piso<br>Vina del Mar, V Region<br>CHILE          |
| 1072   | [REDACTED] | [REDACTED] | [REDACTED] | Comite Etico Cientifico, Servicio de Salud Metropolitano Oriente<br>Avenida Salvador 364<br>Providencia<br>Santiago, RM 7500922<br>CHILE |
| 1133   | [REDACTED] | [REDACTED] | [REDACTED] | Comite de Evaluacion Etica Cientifica<br>Servicio de Salud Araucania Sur<br>Andres Bello 636<br>Temuco, IX Region 4791301<br>CHILE       |

090177e183a72a9c\Approved\Approved On: 10-Oct-2012 02:11 (GMT)

| <u>Center</u> |            |            |            | <u>Institutional Review Board or Ethics Committee Address(es)</u>                                                                           |
|---------------|------------|------------|------------|---------------------------------------------------------------------------------------------------------------------------------------------|
| 1218          | [REDACTED] | [REDACTED] | [REDACTED] | Comite Etico Cientifico<br>Servicio de Salud Metropolitano<br>Oriente<br>Avenida Salvador 364<br>Providencia, Santiago, RM 7500922<br>CHILE |
| 1222          | [REDACTED] | [REDACTED] | [REDACTED] | Comite Etico Cientifico<br>Servicio de Salud Metropolitano<br>Oriente<br>Avenida Salvador 364<br>Providencia, Santiago, RM 7500922<br>CHILE |

090177e183a72a9c\Approved\Approved On: 10-Oct-2012 02:11 (GMT)

Colombia

Coordinating Investigators:

<None Entered>

| <u>Center</u> |            |            |            | <u>Institutional Review Board or Ethics Committee Address(es)</u>                                                                                      |
|---------------|------------|------------|------------|--------------------------------------------------------------------------------------------------------------------------------------------------------|
| 1162          | [REDACTED] | [REDACTED] | [REDACTED] | Comite de etica de la investigación-<br>Riesgo de Fractura S.A<br>Carrera 13 No. 97-25<br>Bogota, Cundinamarca 0000<br>COLOMBIA                        |
| 1163          | [REDACTED] | [REDACTED] | [REDACTED] | Comité de etica independiente centro<br>de reumatologia y ortopedia<br>Cr. 49C No. 82-120<br>Barranquilla, Atlantico 0000<br>COLOMBIA                  |
| 1164          | [REDACTED] | [REDACTED] | [REDACTED] | Comite de ética en Investigación de<br>Servimed E.U<br>Calle 51 No. 34-17. Centro comercial<br>Cabecera Etapa I.<br>Bucaramanga, Santander<br>COLOMBIA |

090177e183a72a9c\Approved\Approved On: 10-Oct-2012 02:11 (GMT)

Costa Rica

Coordinating Investigators:

<None Entered>

| <u>Center</u> | [Redacted] | [Redacted] | [Redacted] | [Redacted] | <u>Institutional Review Board or Ethics Committee Address(es)</u>                                                                     |
|---------------|------------|------------|------------|------------|---------------------------------------------------------------------------------------------------------------------------------------|
| 1205          | [Redacted] | [Redacted] | [Redacted] | [Redacted] | INSTITUTO COSTARRICENSE DE INVESTIGACIONES CLÍNICAS<br>Urbanizacion Los Arboles, Frente al CENARE<br>La Uruca, San Jose<br>COSTA RICA |
| 1207          | [Redacted] | [Redacted] | [Redacted] | [Redacted] | INSTITUTO COSTARRICENSE DE INVESTIGACIONES CLÍNICAS<br>Urbanizacion Los Arboles, Frente al CENARE<br>La Uruca, San Jose<br>COSTA RICA |
| 1208 *        | [Redacted] | [Redacted] | [Redacted] | [Redacted] | INSTITUTO COSTARRICENSE DE INVESTIGACIONES CLÍNICAS<br>Urbanizacion Los Arboles, Frente al CENARE<br>La Uruca, San Jose<br>COSTA RICA |

090177e183a72a9c\Approved\Approved On: 10-Oct-2012 02:11 (GMT)

\* Did not randomize subjects (for randomized study) or enroll subjects (for open study)

Czech Republic

Coordinating Investigators:

<None Entered>

| <u>Center</u> |            |            |            | <u>Institutional Review Board or Ethics Committee Address(es)</u>                                                                                                                                         |
|---------------|------------|------------|------------|-----------------------------------------------------------------------------------------------------------------------------------------------------------------------------------------------------------|
| 1188          | [REDACTED] | [REDACTED] | [REDACTED] | Eticka komise Fakultni nemocnice<br>Hradec Kralove<br>Sokolska 581<br>Hradec Kralove, 500 05<br>CZECH REPUBLIC<br><br>Eticka komise IKEM a FTNsP<br>Videnska 800<br>Praha 4 Krc, 140 59<br>CZECH REPUBLIC |
| 1189          | [REDACTED] | [REDACTED] | [REDACTED] | Eticka komise IKEM a FTNsP<br>Videnska 800<br>Praha 4 Krc, 140 59<br>CZECH REPUBLIC                                                                                                                       |
| 1192          | [REDACTED] | [REDACTED] | [REDACTED] | Eticka komise IKEM a FTNsP<br>Videnska 800<br>Praha 4 Krc, 140 59<br>CZECH REPUBLIC                                                                                                                       |

090177e183a72a9c\Approved\Approved On: 10-Oct-2012 02:11 (GMT)

| <u>Center</u> |            |            |            |            | <u>Institutional Review Board or Ethics Committee Address(es)</u>                        |
|---------------|------------|------------|------------|------------|------------------------------------------------------------------------------------------|
| 1193          | [REDACTED] | [REDACTED] | [REDACTED] | [REDACTED] | Eticka komise IKEM a FTNsP<br>Videnska 800<br>Praha 4 Krc, 140 59<br>CZECH REPUBLIC      |
|               |            |            |            |            | Revmatologicky ustav<br>Eticka komise<br>Na Slupi 4<br>Praha 2, 128 50<br>CZECH REPUBLIC |
| 1194          | [REDACTED] |            | [REDACTED] | [REDACTED] | Eticka komise IKEM a FTNsP<br>Videnska 800<br>Praha 4 Krc, 140 59<br>CZECH REPUBLIC      |
| 1195          | [REDACTED] |            | [REDACTED] | [REDACTED] | Eticka komise FN Brno<br>Jihlavska 20<br>Brno, 625 00<br>CZECH REPUBLIC                  |
|               |            |            |            |            | Eticka komise IKEM a FTNsP<br>Videnska 800<br>Praha 4 Krc, 140 59<br>CZECH REPUBLIC      |

090177e183a72a9c\Approved\Approved On: 10-Oct-2012 02:11 (GMT)



**Dominican Republic**

**Coordinating Investigators:**

<None Entered>

**Center**

1022

[REDACTED]

**Institutional Review Board or Ethics Committee Address(es)**

CONABIOS  
Avenida Bolivar N° 902; La Julia  
Santo Domingo, Santo Domingo  
DOMINICAN REPUBLIC

090177e183a72a9c\Approved\Approved On: 10-Oct-2012 02:11 (GMT)

Germany

Coordinating Investigators:

<None Entered>

| Center |            |            |            |            | <u>Institutional Review Board or Ethics Committee Address(es)</u>                            |
|--------|------------|------------|------------|------------|----------------------------------------------------------------------------------------------|
| 1079   | [REDACTED] | [REDACTED] | [REDACTED] | [REDACTED] | Ethik-Kommission der Ärztekammer<br>Hamburg<br>Humboldtstr. 67a<br>Hamburg, 22083<br>GERMANY |
| 1080   | [REDACTED] | [REDACTED] | [REDACTED] | [REDACTED] | Ethik-Kommission der Ärztekammer<br>Hamburg<br>Humboldtstr. 67a<br>Hamburg, 22083<br>GERMANY |
| 1081   | [REDACTED] | [REDACTED] | [REDACTED] | [REDACTED] | Ethik-Kommission der Ärztekammer<br>Hamburg<br>Humboldtstr. 67a<br>Hamburg, 22083<br>GERMANY |
| 1082   | [REDACTED] | [REDACTED] | [REDACTED] | [REDACTED] | Ethik-Kommission der Ärztekammer<br>Hamburg<br>Humboldtstr. 67a<br>Hamburg, 22083<br>GERMANY |

090177e183a72a9c\Approved\Approved On: 10-Oct-2012 02:11 (GMT)

| <u>Center</u> |            |            |            |            | <u>Institutional Review Board or Ethics Committee Address(es)</u>                             |
|---------------|------------|------------|------------|------------|-----------------------------------------------------------------------------------------------|
| 1083          | [REDACTED] | [REDACTED] | [REDACTED] | [REDACTED] | Ethik-Kommission der Ärztekammer<br>Hamburg<br>Humboldtstr. 67a<br>Hamburg, 22083<br>GERMANY  |
| 1097          | [REDACTED] |            | [REDACTED] | [REDACTED] | Ethik-Kommission der Ärztekammer<br>Hamburg<br>Humboldtstr. 67a<br>Hamburg, 22083<br>GERMANY  |
| 1105          | [REDACTED] |            | [REDACTED] | [REDACTED] | Ethik-Kommission der Ärztekammer<br>Hamburg<br>Humboldtstr. 67a<br>Hamburg, 22083<br>GERMANY  |
| 1231          | [REDACTED] |            | [REDACTED] | [REDACTED] | Ethik-Kommission der<br>Aerztekammer Hamburg<br>Humboldtstr. 67a<br>Hamburg, 22083<br>GERMANY |

090177e183a72a9c\Approved\Approved On: 10-Oct-2012 02:11 (GMT)

**Hungary**

**Coordinating Investigators:**

<None Entered>

| <u>Center</u> |            |            |            | <u>Institutional Review Board or Ethics Committee Address(es)</u>                                                                |
|---------------|------------|------------|------------|----------------------------------------------------------------------------------------------------------------------------------|
| 1116          | [REDACTED] | [REDACTED] | [REDACTED] | Egeszsegugyi Tudomanyos Tanacs<br>Klinikai Farmakologiai Etikai<br>Bizottsaga<br>Arany J. u. 6-8.<br>Budapest, H-1051<br>HUNGARY |
| 1117          | [REDACTED] | [REDACTED] | [REDACTED] | Egeszsegugyi Tudomanyos Tanacs<br>Klinikai Farmakologiai Etikai<br>Bizottsaga<br>Arany J. u. 6-8.<br>Budapest, H-1051<br>HUNGARY |
| 1118          | [REDACTED] | [REDACTED] | [REDACTED] | Egeszsegugyi Tudomanyos Tanacs<br>Klinikai Farmakologiai Etikai<br>Bizottsaga<br>Arany J. u. 6-8.<br>Budapest, H-1051<br>HUNGARY |
| 1120          | [REDACTED] | [REDACTED] | [REDACTED] | Egeszsegugyi Tudomanyos Tanacs<br>Klinikai Farmakologiai Etikai<br>Bizottsaga<br>Arany J. u. 6-8.<br>Budapest, H-1051<br>HUNGARY |

090177e183a72a9c\Approved\Approved On: 10-Oct-2012 02:11 (GMT)

Center  
1229

[REDACTED]

**Institutional Review Board or  
Ethics Committee Address(es)**

Egeszsegugyi Tudomanyos Tanacs  
Klinikai Farmakologiai Etikai  
Bizottsaga  
Arany J. u. 6-8.  
Budapest, H-1051  
HUNGARY

090177e183a72a9c\Approved\Approved On: 10-Oct-2012 02:11 (GMT)

India

Coordinating Investigators:

<None Entered>

Center

1110

[Redacted]

**Institutional Review Board or Ethics Committee Address(es)**

CRD Ethics Committee  
11, Hermes Elegance  
1988, Convent Street Camp  
Pune, Maharashtra 411 001  
INDIA

1111

[Redacted]

Institutional Ethical Committee for  
Bio Medical Research  
Bhagwan Mahavir Medical Research  
Center, Mahavir Hospital &  
Research Center,  
10-1-1, Bhagwan Mahavir Marg,  
A.C. Guards,  
Hyderabad, Andhra Pradesh 500 004  
INDIA

090177e183a72a9c\Approved\Approved On: 10-Oct-2012 02:11 (GMT)

090177e183a72a9c\Approved\Approved On: 10-Oct-2012 02:11 (GMT)

| <u>Center</u> |            |            |            |            | <b><u>Institutional Review Board or Ethics Committee Address(es)</u></b>                                                                                              |
|---------------|------------|------------|------------|------------|-----------------------------------------------------------------------------------------------------------------------------------------------------------------------|
| 1112          | [REDACTED] | [REDACTED] | [REDACTED] | [REDACTED] | Institutional Ethics Committee<br>Krishna Institute of Medical Sciences Ltd,<br>1-8-31/1,<br>Minister Road<br>Secunderabad, Andhra Pradesh 500 003<br>INDIA           |
| 1136          | [REDACTED] |            | [REDACTED] | [REDACTED] | Ethics Committee - Shalby Hospitals,<br>Shalby Hospitals,<br>Opp. Kamavati Club,<br>S. G. Road, P. O. Ambawadi Vistar,<br>Ahmedabad, Gujarat 380 015<br>INDIA         |
| 1166          | [REDACTED] |            | [REDACTED] | [REDACTED] | CLINICOM<br>Committee for Evaluation of<br>Protocol for Clinical Research<br>"Bhooma", No.7, 17 A Cross,<br>Malleswaram West<br>Bangalore, Karnataka 560 055<br>INDIA |

| <u>Center</u> |            |            |            |            | <u>Institutional Review Board or Ethics Committee Address(es)</u>                                                                                                                            |
|---------------|------------|------------|------------|------------|----------------------------------------------------------------------------------------------------------------------------------------------------------------------------------------------|
| 1210          | [REDACTED] | [REDACTED] | [REDACTED] | [REDACTED] | Ethics Committee of The Heart Care Clinic<br>201, Balleshwar Avenue<br>Opp. Rajpath Club,<br>Sarkhej Gandhinagar Highway<br>Ahmedabad, Gujarat 380 015<br>INDIA                              |
| 1219          | [REDACTED] |            | [REDACTED] | [REDACTED] | Hirabai Cowasji Jehangir Medical Research Institute and Jehangir Development Centre Ethics Committee<br>Jehangir Hospital Premises<br>32, Sassoon Road<br>Pune, Maharashtra 411 001<br>INDIA |

090177e183a72a9c\Approved\Approved On: 10-Oct-2012 02:11 (GMT)



**Korea, Republic Of**

**Coordinating Investigators:**

<None Entered>

| <u>Center</u> |            |            |            | <u>Institutional Review Board or Ethics Committee Address(es)</u>                                                                                         |
|---------------|------------|------------|------------|-----------------------------------------------------------------------------------------------------------------------------------------------------------|
| 1075          | [REDACTED] | [REDACTED] | [REDACTED] | Seoul National University College of Medicine/Seoul National University Hospital IRB<br>101 Daehang-ro, Jongno-gu<br>Seoul, 110-744<br>KOREA, REPUBLIC OF |
| 1076          | [REDACTED] | [REDACTED] | [REDACTED] | Asan Medical Center IRB<br>86 Asanbyeongwon-gil, Songpa-gu<br>Seoul, 138-736<br>KOREA, REPUBLIC OF                                                        |
| 1077          | [REDACTED] | [REDACTED] | [REDACTED] | Severance Hospital Institutional Review Board<br>250 Seongsanno, Seodaemun-Gu<br>Seoul, 120-752<br>KOREA, REPUBLIC OF                                     |

090177e183a72a9c\Approved\Approved On: 10-Oct-2012 02:11 (GMT)

Malaysia

Coordinating Investigators:

<None Entered>

Center

1178

[Redacted]

**Institutional Review Board or Ethics Committee Address(es)**

Medical Research & Ethics Committee  
Ministry of Health, c/o NIH Secretariat, Institute for Health Management  
Jalan Rumah Sakit  
Bangsar  
Kuala Lumpur, 59000  
MALAYSIA

1179

[Redacted]

Medical Research & Ethics Committee  
Ministry of Health, c/o NIH Secretariat, Institute for Health Management  
Jalan Rumah Sakit  
Bangsar  
Kuala Lumpur, 59000  
MALAYSIA

Sunway Medical Centre Independent Research Ethics Committee (SREC)  
Clinical Research Centre  
Sunway Medical Centre  
No. 5, Jalan Lagoon Selatan  
Bandar Sunway, Petaling Jaya,  
Selangor Darul Ehsan 46150  
MALAYSIA

090177e183a72a9c\Approved\Approved On: 10-Oct-2012 02:11 (GMT)

Center  
1217

[REDACTED]

**Institutional Review Board or  
Ethics Committee Address(es)**

Medical Research & Ethics  
Committee  
Ministry of Health, c/o NIH  
Secretariat, Institute for Health  
Management  
Jalan Rumah Sakit  
Bangsar  
Kuala Lumpur, 59000  
MALAYSIA

090177e183a72a9c\Approved\Approved On: 10-Oct-2012 02:11 (GMT)

Mexico

Coordinating Investigators:

<None Entered>

| Center |            |            |            |            | <u>Institutional Review Board or Ethics Committee Address(es)</u>                                                                                                                                                                                                                                    |
|--------|------------|------------|------------|------------|------------------------------------------------------------------------------------------------------------------------------------------------------------------------------------------------------------------------------------------------------------------------------------------------------|
| 1074   | [REDACTED] | [REDACTED] | [REDACTED] | [REDACTED] | Comite de Bioetica de la Unidad de Investigacion en Enfermedades Cronico-Degenerativas Colomos 2292 Col. Providencia Guadalajara, Jalisco 44620 MEXICO                                                                                                                                               |
| 1094   | [REDACTED] | [REDACTED] | [REDACTED] | [REDACTED] | Comite de Etica de la Facultad de Medicina y Hospital Universitario Dr Jose Eleuterio Gonzalez Edificio de la Bliiblioteca Central de la Facultad de Medicina de la U.A.N.L Planta baja Av Francisco I. Madero Pte s/n y Dr E. Aguirre Pequeño Col. Mitras Centro Monterrey, Nuevo León 64460 MEXICO |
| 1174   | [REDACTED] | [REDACTED] | [REDACTED] | [REDACTED] | Comite de Bioetica Facultad de Medicina de la Universidad Autonoma de Coahuila Avenue Morelos # 900 Ote. Torreon Coahuila, C.P. 27000 MEXICO                                                                                                                                                         |

090177e183a72a9c\Approved\Approved On: 10-Oct-2012 02:11 (GMT)

Center  
1175

[REDACTED]

[REDACTED]

[REDACTED]

**Institutional Review Board or  
Ethics Committee Address(es)**

Instituto Jalisciense de Investigacion  
Clinica S.A de C.V  
Calle Penitenciaria 20  
Colonia Centro  
Guadalajara, Jalisco 44100  
MEXICO

090177e183a72a9c\Approved\Approved On: 10-Oct-2012 02:11 (GMT)

**New Zealand**

**Coordinating Investigators:**

<None Entered>

| <u>Center</u> |            |            |            | <u>Institutional Review Board or Ethics Committee Address(es)</u>                                                    |
|---------------|------------|------------|------------|----------------------------------------------------------------------------------------------------------------------|
| 1101 *        | [REDACTED] | [REDACTED] | [REDACTED] | Multi-region Ethics Committee<br>Ministry of Health<br>1-3 The Terrace<br>Level 1<br>Wellington, 6011<br>NEW ZEALAND |
| 1102 *        | [REDACTED] | [REDACTED] | [REDACTED] | Multi-region Ethics Committee<br>Ministry of Health<br>133 Molesworth Street<br>Wellington, 6145<br>NEW ZEALAND      |
| 1103          | [REDACTED] | [REDACTED] | [REDACTED] | Multi-region Ethics Committee<br>Ministry of Health<br>1-3 The Terrace<br>Level 1<br>Wellington, 6011<br>NEW ZEALAND |
| 1104          | [REDACTED] | [REDACTED] | [REDACTED] | Multi-region Ethics Committee<br>Ministry of Health<br>133 Molesworth Street<br>Wellington, 6145<br>NEW ZEALAND      |

090177e183a72a9c\Approved\Approved On: 10-Oct-2012 02:11 (GMT)

\* Did not randomize subjects (for randomized study) or enroll subjects (for open study)

| <u>Center</u> |            |            |            |            | <u>Institutional Review Board or Ethics Committee Address(es)</u>                                               |
|---------------|------------|------------|------------|------------|-----------------------------------------------------------------------------------------------------------------|
| 1157          | [REDACTED] | [REDACTED] | [REDACTED] | [REDACTED] | Multi-region Ethics Committee<br>Ministry of Health<br>133 Molesworth Street<br>Wellington, 6145<br>NEW ZEALAND |
| 1161 *        | [REDACTED] |            | [REDACTED] | [REDACTED] | Multi-region Ethics Committee<br>Ministry of Health<br>133 Molesworth Street<br>Wellington, 6145<br>NEW ZEALAND |

090177e183a72a9c\Approved\Approved On: 10-Oct-2012 02:11 (GMT)

\* Did not randomize subjects (for randomized study) or enroll subjects (for open study)

Peru

Coordinating Investigators:

<None Entered>

| <u>Center</u> | [REDACTED] | [REDACTED] | [REDACTED] | [REDACTED] | <u>Institutional Review Board or Ethics Committee Address(es)</u>                                                                                                        |
|---------------|------------|------------|------------|------------|--------------------------------------------------------------------------------------------------------------------------------------------------------------------------|
| 1088          | [REDACTED] | [REDACTED] | [REDACTED] | [REDACTED] | Comite Institucional de Etica de la Universidad Peruana Cayetano Heredia<br>Av. Honorio Delgado 430.<br>Urb. Ingenieria. San Martin de Porres.<br>Lima, Lima L31<br>PERU |
| 1090          | [REDACTED] | [REDACTED] | [REDACTED] | [REDACTED] | Comite Institucional de Etica de la Universidad Peruana Cayetano Heredia<br>Av. Honorio Delgado 430.<br>Urb. Ingenieria. San Martin de Porres.<br>Lima, Lima L31<br>PERU |
| 1091          | [REDACTED] | [REDACTED] | [REDACTED] | [REDACTED] | Comite Institucional de Etica de la Universidad Peruana Cayetano Heredia<br>Av. Honorio Delgado 430.<br>Urb. Ingenieria. San Martin de Porres.<br>Lima, Lima L31<br>PERU |

090177e183a72a9c\Approved\Approved On: 10-Oct-2012 02:11 (GMT)



Center  
1092

[REDACTED]

**Institutional Review Board or  
Ethics Committee Address(es)**

COMITE DE BIOETICA DE LA  
RED ASISTENCIAL SABOGAL -  
ESSALUD  
Jr. Colina 1081  
Bellavista, Callao Callao 02  
PERU

090177e183a72a9c\Approved\Approved On: 10-Oct-2012 02:11 (GMT)

Philippines

Coordinating Investigators:

<None Entered>

| Center |            |            |            |            | Institutional Review Board or Ethics Committee Address(es)                                                                                 |
|--------|------------|------------|------------|------------|--------------------------------------------------------------------------------------------------------------------------------------------|
| 1138   | [REDACTED] | [REDACTED] | [REDACTED] | [REDACTED] | Brokenshire Integrated Health Ministries, Inc. Brokenshire Memorial Hospital<br>Room 237<br>Madapo<br>Davao City, 8000<br>PHILIPPINES      |
| 1139   | [REDACTED] | [REDACTED] | [REDACTED] | [REDACTED] | Institutional Ethics Review Committee<br>Jose Reyes Memorial Medical Center<br>Rizal Ave.<br>Sta. Cruz<br>Manila, 1003<br>PHILIPPINES      |
| 1140   | [REDACTED] | [REDACTED] | [REDACTED] | [REDACTED] | Institutional Review Board<br>4th Floor Annex Bldg.<br>Chong Hua Hospital<br>Don Mariano<br>Cui St.<br>Cebu City, Cebu 6000<br>PHILIPPINES |

090177e183a72a9c\Approved\Approved On: 10-Oct-2012 02:11 (GMT)

**Poland**

**Coordinating Investigators:**

<None Entered>

| <u>Center</u> |            |            |            | <u>Institutional Review Board or Ethics Committee Address(es)</u>                                               |
|---------------|------------|------------|------------|-----------------------------------------------------------------------------------------------------------------|
| 1065          | [REDACTED] | [REDACTED] | [REDACTED] | Komisja Bioetyczna przy Okręgowej Izbie Lekarskiej w Warszawie<br>ul. Puławska 18<br>Warszawa, 02-512<br>POLAND |
| 1171          | [REDACTED] | [REDACTED] | [REDACTED] | Komisja Bioetyczna przy Okręgowej Izbie Lekarskiej w Warszawie<br>ul. Puławska 18<br>Warszawa, 02-512<br>POLAND |
| 1172          | [REDACTED] | [REDACTED] | [REDACTED] | Komisja Bioetyczna przy Okręgowej Izbie Lekarskiej w Warszawie<br>ul. Puławska 18<br>Warszawa, 02-512<br>POLAND |
| 1173 *        | [REDACTED] | [REDACTED] | [REDACTED] | Komisja Bioetyczna przy Okręgowej Izbie Lekarskiej w Warszawie<br>ul. Puławska 18<br>Warszawa, 02-512<br>POLAND |

090177e183a72a9c\Approved\Approved On: 10-Oct-2012 02:11 (GMT)

\* Did not randomize subjects (for randomized study) or enroll subjects (for open study)

**Puerto Rico**

**Coordinating Investigators:**

<None Entered>

**Center**

1024

|            |            |            |            |
|------------|------------|------------|------------|
| [REDACTED] | [REDACTED] | [REDACTED] | [REDACTED] |
| [REDACTED] | [REDACTED] | [REDACTED] | [REDACTED] |

**Institutional Review Board or Ethics Committee Address(es)**

Quorum Review Institutional Review Board Incorporated  
Suite 1000  
1601 Fifth Avenue  
Seattle, WA 98101  
UNITED STATES

090177e183a72a9c\Approved\Approved On: 10-Oct-2012 02:11 (GMT)

Russian Federation

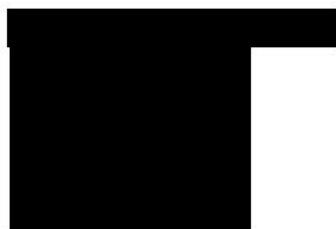

| <u>Center</u> | <u>Institutional Review Board or Ethics Committee Address(es)</u>                                                                                                                                               |
|---------------|-----------------------------------------------------------------------------------------------------------------------------------------------------------------------------------------------------------------|
| 1144          | Independent Ethics Committee of State Educational Institution of High Professional Education Smolensk State Medical Academy 28 ulitsa Krupskoy, 214019 27 prospect Gagarina Smolensk, 214018 RUSSIAN FEDERATION |
| 1146          | Local Ethics Committee at the L.G. Sokolov Clinical Hospital #122 4 Prospect Kultury Saint-Petersburg, 194291 RUSSIAN FEDERATION                                                                                |
| 1147          | Local Ethics Committee at the State Health Institution City Hospital # 25 City Rheumatology Center of St. Petersburg 30 Bolshaya Podyatcheskaya Ulitsa St. Petersburg, 190068 RUSSIAN FEDERATION                |

090177e183a72a9c\Approved\Approved On: 10-Oct-2012 02:11 (GMT)

090177e183a72a9c\Approved\Approved On: 10-Oct-2012 02:11 (GMT)

| <u>Center</u> |            |            |            |            | <u>Institutional Review Board or Ethics Committee Address(es)</u>                                                                                                                          |
|---------------|------------|------------|------------|------------|--------------------------------------------------------------------------------------------------------------------------------------------------------------------------------------------|
| 1154          | [REDACTED] | [REDACTED] | [REDACTED] | [REDACTED] | Local Ethics Committee at the St. Petersburg State Institution of Healthcare Consultative-diagnostic Center #85<br>89/3 Prospect Veteranov<br>St. Petersburg, 198260<br>RUSSIAN FEDERATION |
| 1155          | [REDACTED] | [REDACTED] | [REDACTED] | [REDACTED] | Ethics Committee at the City Hospital # 40 Kurortnogo Administrativnogo Rajona<br>Borisova ulitsa, 9, lit. B, Sestroretsk<br>St.Petersburg, 197706<br>RUSSIAN FEDERATION                   |
| 1156          | [REDACTED] | [REDACTED] | [REDACTED] | [REDACTED] | Independent Ethics Committee of the Almazov Federal Heart, Blood and Endocrinology Centre<br>15 Prospect Parkhomenko<br>Saint Petersburg, 194156<br>RUSSIAN FEDERATION                     |
| 1223          | [REDACTED] | [REDACTED] | [REDACTED] | [REDACTED] | Local Ethics Committee of State Healthcare<br>Institution "Regional Clinical Hospital"<br>Lapidevskogo Street, 1<br>Barnaul, 656024<br>RUSSIAN FEDERATION                                  |

| <u>Center</u> |            |            |            |            | <b><u>Institutional Review Board or Ethics Committee Address(es)</u></b>                                                                                                                                             |
|---------------|------------|------------|------------|------------|----------------------------------------------------------------------------------------------------------------------------------------------------------------------------------------------------------------------|
| 1224          | [REDACTED] | [REDACTED] | [REDACTED] | [REDACTED] | Local Ethics Committee of Regional State Healthcare Institution of Tomsk Regional Clinical Hospital<br>96, Ivana Chernykh str.<br>Tomsk, 634063<br>RUSSIAN FEDERATION                                                |
| 1225          | [REDACTED] | [REDACTED] | [REDACTED] | [REDACTED] | Local Ethics Committee of State Healthcare Institution Regional Clinical Hospital for War Veterans<br>50 let Oktaybrya str.<br>10, Kemerovo, 650099<br>RUSSIAN FEDERATION                                            |
| 1226          | [REDACTED] | [REDACTED] | [REDACTED] | [REDACTED] | Local Ethics Committee of State Institution<br>Scientific Research Institute of Clinical and Experimental Lymphology of the Siberian Branch of RAMS<br>6, Arbuzova str.<br>Novosibirsk, 630117<br>RUSSIAN FEDERATION |

090177e183a72a9c\Approved\Approved On: 10-Oct-2012 02:11 (GMT)

Center  
1227

[REDACTED]

[REDACTED]

[REDACTED]

**Institutional Review Board or  
Ethics Committee Address(es)**  
Local Ethics Committee at Ural State  
Medical Academy  
3 ulitsa Repina  
Ekaterinburg, 620109  
RUSSIAN FEDERATION

1228

[REDACTED]

[REDACTED]

[REDACTED]

Local Ethics Committee of State  
Healthcare  
Institution "Sverdlovsk Regional  
Clinical Hospital No. 1"  
185, Volgogradskaya str.  
Ekaterinburg, 620102  
RUSSIAN FEDERATION

090177e183a72a9c\Approved\Approved On: 10-Oct-2012 02:11 (GMT)



Slovakia

Coordinating Investigators:

<None Entered>

Center

1200

[Redacted Center Information]

**Institutional Review Board or Ethics Committee Address(es)**

Eticka komisia Zilinsky samospravny kraj  
Komenskeho 48  
Zilina, 01109  
SLOVAKIA

Eticka komisia, Narodny ustav reumatickych chorob  
Nabrezie I. Krasku 4  
Piestany, 921 12  
SLOVAKIA

Statny ustav pre kontrolu lieciv  
Kvetna 11  
Bratislava, 825 08  
SLOVAKIA

1201

[Redacted Center Information]

Eticka komisia Nitriansky samospravny kraj  
Stefanikova tr. 69  
Nitra, 94901  
SLOVAKIA

Eticka komisia, Narodny ustav reumatickych chorob  
Nabrezie I. Krasku 4  
Piestany, 921 12  
SLOVAKIA

Statny ustav pre kontrolu lieciv  
Kvetna 11  
Bratislava, 825 08  
SLOVAKIA

090177e183a72a9c\Approved\Approved On: 10-Oct-2012 02:11 (GMT)

Center  
1202

[REDACTED]

**Institutional Review Board or  
Ethics Committee Address(es)**

Eticka komisia Bratislavsky  
samospravny kraj  
Sabinovska 16, P.O.Box 106  
Bratislava, 82005  
SLOVAKIA

Eticka komisia, Narodny ustav  
reumatickych chorob  
Nabrezie I. Krasku 4  
Piestany, 921 12  
SLOVAKIA

Statny ustav pre kontrolu lieciv  
Kvetna 11  
Bratislava, 825 08  
SLOVAKIA

1203

[REDACTED]

Eticka komisia Trnavsky  
samospravny kraj  
Starohajska 10, P.O.Box 128  
Trnava, 91701  
SLOVAKIA

Eticka komisia, Narodny ustav  
reumatickych chorob  
Nabrezie I. Krasku 4  
Piestany, 921 12  
SLOVAKIA

Statny ustav pre kontrolu lieciv  
Kvetna 11  
Bratislava, 825 08  
SLOVAKIA

090177e183a72a9c\Approved\Approved On: 10-Oct-2012 02:11 (GMT)

Center  
1204

[REDACTED]

**Institutional Review Board or  
Ethics Committee Address(es)**

Eticka komisia, Narodny ustav  
reumatickych chorob  
Nabrezie I. Krasku 4  
Piestany, 921 12  
SLOVAKIA

Statny ustav pre kontrolu lieciv  
Kvetna 11  
Bratislava, 825 08  
SLOVAKIA

090177e183a72a9c\Approved\Approved On: 10-Oct-2012 02:11 (GMT)

Spain

Coordinating Investigators:

<None Entered>

Center

1095

[Redacted Center Information]

**Institutional Review Board or Ethics Committee Address(es)**

Comite Etico de Investigacion  
Clinica de Galicia (SERGAS)  
Conselleria de Sanidade  
Division de Farmacia e Productos  
Sanitarios  
C/ San Lazaro, s/n  
Santiago de Compostela, A Coruña  
15703  
SPAIN

Hospital General Universitario  
Gregorio Marañon  
COMITE ETICO DE  
INVESTIGACION CLINICA  
C/ DOCTOR ESQUERDO 46  
MADRID, MADRID 28007  
SPAIN

090177e183a72a9c\Approved\Approved On: 10-Oct-2012 02:11 (GMT)

Center  
1184

[REDACTED]

[REDACTED]

[REDACTED]

**Institutional Review Board or  
Ethics Committee Address(es)**

Comite Autonomico de Ensayos  
Clinicos de Andalucia  
Consejería de Salud  
Edificio Arena 1  
Av. Innovación, s/n  
Sevilla, Sevilla 41020  
SPAIN

Hospital General Universitario  
Gregorio Marañon  
COMITE ETICO DE  
INVESTIGACION CLINICA  
C/ DOCTOR ESQUERDO 46  
MADRID, MADRID 28007  
SPAIN

Hospital Universitario Virgen de la  
Macarena  
Comite Etico de Investigacion  
Clinica  
Avda. Doctor Fedriani, 3  
Sevilla, Sevilla 41009  
SPAIN

090177e183a72a9c\Approved\Approved On: 10-Oct-2012 02:11 (GMT)

090177e183a72a9c\Approved\Approved On: 10-Oct-2012 02:11 (GMT)

Center  
1185

[REDACTED]

[REDACTED]

[REDACTED]

**Institutional Review Board or Ethics Committee Address(es)**

Comite Autonomico de Ensayos  
Clinicos de Andalucia  
Consejería de Salud  
Edificio Arena 1  
Av. Innovación, s/n  
Sevilla, Sevilla 41020  
SPAIN

Hospital General Universitario  
Gregorio Marañon  
COMITE ETICO DE  
INVESTIGACION CLINICA  
C/ DOCTOR ESQUERDO 46  
MADRID, MADRID 28007  
SPAIN

Hospital Universitario Carlos Haya  
Comite Etico de Investigacion  
Clinica  
Avda. Carlos Haya, s/n  
Malaga, Malaga 29010  
SPAIN

1187

[REDACTED]

[REDACTED]

[REDACTED]

Hospital Universitario Doctor Peset  
Ethics Committee of Clinic  
Investigation  
C/ Gaspar Aguilar, 90  
1ª Planta. Consultas Externas  
Valencia, 46017  
SPAIN

Center  
1198

[REDACTED]

**Institutional Review Board or Ethics Committee Address(es)**

Comite Etico de Investigacion  
Clinica de Euskadi  
Secretaria Administrativa  
Direccion de Farmacia ¿  
Departamento de Sanidad del  
Gobierno Vasco  
C/ Donostia-San Sebastian, 1  
Vitoria, Alava 01010  
SPAIN

Hospital de Basurto  
Comite Etico de Investigacion  
Clinica  
Pabellon Jado 4ª Planta  
Avda. Montevideo, 18  
Bilbao, Vizcaya 48013  
SPAIN

Hospital General Universitario  
Gregorio Marañon  
COMITE ETICO DE  
INVESTIGACION CLINICA  
C/ DOCTOR ESQUERDO 46  
MADRID, MADRID 28007  
SPAIN

090177e183a72a9c\Approved\Approved On: 10-Oct-2012 02:11 (GMT)

Sweden

Coordinating Investigators:

<None Entered>

| <u>Center</u> |            |            |            |            | <u>Institutional Review Board or Ethics Committee Address(es)</u>                      |
|---------------|------------|------------|------------|------------|----------------------------------------------------------------------------------------|
| 1209          | [REDACTED] | [REDACTED] | [REDACTED] | [REDACTED] | Ethic Committee in Lund<br>Ethic Committee in Lund<br>Box 133<br>Lund, 22100<br>SWEDEN |
| 1216          | [REDACTED] |            | [REDACTED] | [REDACTED] | Regionala etikprovningarnamnden i<br>Lund<br>Box 133<br>Lund, 22100<br>SWEDEN          |
| 1221          | [REDACTED] |            | [REDACTED] | [REDACTED] | Regionala etikprovningarnamnden i<br>Lund<br>Box 133<br>Lund, 22100<br>SWEDEN          |

090177e183a72a9c\Approved\Approved On: 10-Oct-2012 02:11 (GMT)



Taiwan

Coordinating Investigators:

<None Entered>

| <u>Center</u> | [Redacted] | [Redacted] | [Redacted] | [Redacted] | <u>Institutional Review Board or Ethics Committee Address(es)</u>                                                                                                      |
|---------------|------------|------------|------------|------------|------------------------------------------------------------------------------------------------------------------------------------------------------------------------|
| 1034          | [Redacted] |            | [Redacted] | [Redacted] | Kaohsiung Medical University<br>Chung-Ho Memorial Hospital,<br>Institutional Review Board<br>No. 100, Tzyou 1st Road<br>Kaohsiung, Taiwan 807<br>TAIWAN                |
| 1047          | [Redacted] |            | [Redacted] | [Redacted] | The Institutional Review Board of<br>Taichung Veterans General Hospital<br>No. 160, Section. 3, Taichung Port<br>Road., Situn District<br>Taichung City, 407<br>TAIWAN |
| 1135          | [Redacted] |            | [Redacted] | [Redacted] | Human Experiment and Ethics<br>Committee National Cheng Kung<br>University Hospital<br>138 Sheng Li Road<br>Tainan, 704<br>TAIWAN                                      |

090177e183a72a9c\Approved\Approved On: 10-Oct-2012 02:11 (GMT)

**Thailand**

**Coordinating Investigators:**

<None Entered>

| <u>Center</u> | <u>Institutional Review Board or Ethics Committee Address(es)</u>                                                                                                                                                                                                                                                                                                                                                                                                                                       |
|---------------|---------------------------------------------------------------------------------------------------------------------------------------------------------------------------------------------------------------------------------------------------------------------------------------------------------------------------------------------------------------------------------------------------------------------------------------------------------------------------------------------------------|
| 1176          | <p>Siriraj Institutional Review Board<br/>                 2 Prannok Road<br/>                 Bangkoknoi<br/>                 Bangkok, Bangkok 10700<br/>                 THAILAND</p>                                                                                                                                                                                                                                                                                                                 |
| 1199          | <p>Institutional Review Board Royal Thai Army Medical Department<br/>                 317 Rajavithi Road<br/>                 Rajathevee<br/>                 Bangkok, 10400<br/>                 THAILAND</p>                                                                                                                                                                                                                                                                                          |
| 1211          | <p>Ethics Committee Institute for Development of Human Research Protections (IHRP)<br/>                 Building 8 Floor 7 Room 702<br/>                 Department of Medical Science<br/>                 Ministry Public Health<br/>                 Nonthaburi, 11000<br/>                 THAILAND</p> <p>Ethics Committees on Researches Involving Human Subjects, Rajavithi Hospital<br/>                 2 Rajavithi Road<br/>                 Bangkok, 10400<br/>                 THAILAND</p> |

090177e183a72a9c\Approved\Approved On: 10-Oct-2012 02:11 (GMT)

Ukraine

Coordinating Investigators:

<None Entered>

| Center |            |            |            |            | Institutional Review Board or Ethics Committee Address(es)                                                                                                    |
|--------|------------|------------|------------|------------|---------------------------------------------------------------------------------------------------------------------------------------------------------------|
| 1148   | [REDACTED] | [REDACTED] | [REDACTED] | [REDACTED] | Committee for Ethics Issues of Municipal City Clinical Hospital #4<br>3 Sventsitskogo Str<br>Lviv, 79011<br>UKRAINE                                           |
| 1149   | [REDACTED] | [REDACTED] | [REDACTED] | [REDACTED] | Committee for Bioethics Issues of SI "Crimean State Medical University n.a. S.I. Georgievskiy"<br>5/7 Lenina Boulevard<br>Simferopol, Crimea 95006<br>UKRAINE |
| 1150   | [REDACTED] | [REDACTED] | [REDACTED] | [REDACTED] | Committee for Ethics Issues of State Institution 'Institute of Gerontology of AMS of Ukraine'<br>67, Vyshgorodska Street<br>Kyiv, 04114<br>UKRAINE            |

090177e183a72a9c\Approved\Approved On: 10-Oct-2012 02:11 (GMT)

090177e183a72a9c\Approved\Approved On: 10-Oct-2012 02:11 (GMT)

| <u>Center</u> |            |            |            |            | <u>Institutional Review Board or Ethics Committee Address(es)</u>                                                                                   |
|---------------|------------|------------|------------|------------|-----------------------------------------------------------------------------------------------------------------------------------------------------|
| 1151          | [REDACTED] | [REDACTED] | [REDACTED] | [REDACTED] | Bioethics Committee of Vinnitsa Regional Clinical Hospital n.a. Pirogov<br>46 Pirogova Street<br>Vinnitsa, 21018<br>UKRAINE                         |
| 1152          | [REDACTED] | [REDACTED] | [REDACTED] | [REDACTED] | Committee for Ethics Issues of SI "Republican Clinical Hospital of the MoH of Ukraine",<br>9 Yuriya Kotsyubynskogo Street<br>Kyiv, 04053<br>UKRAINE |
| 1153          | [REDACTED] | [REDACTED] | [REDACTED] | [REDACTED] | Committee for Ethics Issues of Municipal Establishment "City Clinical Hospital #9 n.a. O.I. Minakov"<br>9 Pastera Street<br>Odesa, 65026<br>UKRAINE |

\* Did not randomize subjects (for randomized study) or enroll subjects (for open study)

United States

Coordinating Investigators:

<None Entered>

| <u>Center</u> | [REDACTED] | [REDACTED] | [REDACTED] | [REDACTED] | <u>Institutional Review Board or Ethics Committee Address(es)</u>                                                                 |
|---------------|------------|------------|------------|------------|-----------------------------------------------------------------------------------------------------------------------------------|
| 1001          | [REDACTED] | [REDACTED] | [REDACTED] | [REDACTED] | LSU Health Sciences Center<br>Institutional Review Board<br>433 Bolivar Street<br>New Orleans, LA 70112<br>UNITED STATES          |
| 1002 *        | [REDACTED] | [REDACTED] | [REDACTED] | [REDACTED] | Quorum Review Institutional Review<br>Board Incorporated<br>Suite 1000<br>1601 Fifth Avenue<br>Seattle, WA 98101<br>UNITED STATES |
| 1003          | [REDACTED] | [REDACTED] | [REDACTED] | [REDACTED] | Quorum Review Institutional Review<br>Board Incorporated<br>Suite 1000<br>1601 Fifth Avenue<br>Seattle, WA 98101<br>UNITED STATES |

090177e183a72a9c\Approved\Approved On: 10-Oct-2012 02:11 (GMT)

\* Did not randomize subjects (for randomized study) or enroll subjects (for open study)

090177e183a72a9c\Approved\Approved On: 10-Oct-2012 02:11 (GMT)

| <u>Center</u> |            |            |            |            | <u>Institutional Review Board or Ethics Committee Address(es)</u>                                                                                                 |
|---------------|------------|------------|------------|------------|-------------------------------------------------------------------------------------------------------------------------------------------------------------------|
| 1004          | [REDACTED] | [REDACTED] | [REDACTED] | [REDACTED] | Quorum Review Institutional Review Board Incorporated<br>Suite 1000<br>1601 Fifth Avenue<br>Seattle, WA 98101<br>UNITED STATES                                    |
| 1005          | [REDACTED] |            | [REDACTED] | [REDACTED] | Institutional Review Board for Human Research<br>Office of Research Integrity<br>Suite 601 - MSC 857<br>19 Hagood Avenue<br>Charleston, SC 29425<br>UNITED STATES |
| 1006          | [REDACTED] |            | [REDACTED] | [REDACTED] | Quorum Review Institutional Review Board Incorporated<br>Suite 1000<br>1601 Fifth Avenue<br>Seattle, WA 98101<br>UNITED STATES                                    |

090177e183a72a9c\Approved\Approved On: 10-Oct-2012 02:11 (GMT)

| <u>Center</u><br>1009 * | [REDACTED] | [REDACTED] | [REDACTED] | <b>Institutional Review Board or<br/>Ethics Committee Address(es)</b><br>Quorum Review Institutional Review<br>Board Incorporated<br>Suite 1000<br>1601 Fifth Avenue<br>Seattle, WA 98101<br>UNITED STATES |
|-------------------------|------------|------------|------------|------------------------------------------------------------------------------------------------------------------------------------------------------------------------------------------------------------|
| 1010                    | [REDACTED] | [REDACTED] | [REDACTED] | Quorum Review Institutional Review<br>Board Incorporated<br>Suite 1000<br>1601 Fifth Avenue<br>Seattle, WA 98101<br>UNITED STATES                                                                          |
| 1012                    | [REDACTED] | [REDACTED] | [REDACTED] | Quorum Review Institutional Review<br>Board Incorporated<br>Suite 1000<br>1601 Fifth Avenue<br>Seattle, WA 98101<br>UNITED STATES                                                                          |
| 1013                    | [REDACTED] | [REDACTED] | [REDACTED] | Quorum Institutional Review Board<br>Suite 1000<br>1601 Fifth Avenue<br>Seattle, WA 98101<br>UNITED STATES                                                                                                 |

\* Did not randomize subjects (for randomized study) or enroll subjects (for open study)

Center  
1014

[REDACTED]

[REDACTED]

[REDACTED]

**Institutional Review Board or  
Ethics Committee Address(es)**  
Quorum Review Institutional Review  
Board Incorporated  
Suite 1000  
1601 Fifth Avenue  
Seattle, WA 98101  
UNITED STATES

1015

[REDACTED]

[REDACTED]

[REDACTED]

[REDACTED]

Quorum Review Institutional Review  
Board Incorporated  
Suite 1000  
1601 Fifth Avenue  
Seattle, WA 98101  
UNITED STATES

090177e183a72a9c\Approved\Approved On: 10-Oct-2012 02:11 (GMT)



Center  
1018

[REDACTED]

[REDACTED]

[REDACTED]

**Institutional Review Board or  
Ethics Committee Address(es)**  
Institutional Review Board  
Health Sciences Campus  
General Hospital, Suite 4700  
1200 North State Street  
Los Angeles, CA 90033  
UNITED STATES

1019

[REDACTED]

[REDACTED]

[REDACTED]

Quorum Review Institutional Review  
Board Incorporated  
Suite 1000  
1601 Fifth Avenue  
Seattle, WA 98101  
UNITED STATES

090177e183a72a9c\Approved\Approved On: 10-Oct-2012 02:11 (GMT)

090177e183a72a9c\Approved\Approved On: 10-Oct-2012 02:11 (GMT)

| <u>Center</u><br>1021 | [REDACTED] | [REDACTED] | [REDACTED] | [REDACTED]                                                                                                                     | <b><u>Institutional Review Board or Ethics Committee Address(es)</u></b><br>Quorum Review Institutional Review Board Incorporated<br>Suite 1000<br>1601 Fifth Avenue<br>Seattle, WA 98101<br>UNITED STATES |
|-----------------------|------------|------------|------------|--------------------------------------------------------------------------------------------------------------------------------|------------------------------------------------------------------------------------------------------------------------------------------------------------------------------------------------------------|
| 1023                  | [REDACTED] | [REDACTED] | [REDACTED] | Quorum Review Institutional Review Board Incorporated<br>Suite 1000<br>1601 Fifth Avenue<br>Seattle, WA 98101<br>UNITED STATES |                                                                                                                                                                                                            |
| 1025                  | [REDACTED] | [REDACTED] | [REDACTED] | Quorum Review Institutional Review Board Incorporated<br>Suite 1000<br>1601 Fifth Avenue<br>Seattle, WA 98101<br>UNITED STATES |                                                                                                                                                                                                            |

090177e183a72a9c\Approved\Approved On: 10-Oct-2012 02:11 (GMT)

| <u>Center</u><br>1027 | [REDACTED] | [REDACTED] | [REDACTED] | <b>Institutional Review Board or<br/>Ethics Committee Address(es)</b><br>Quorum Review Institutional Review<br>Board<br>Suite 1000<br>1601 Fifth Avenue<br>Seattle, WA 98101<br>UNITED STATES            |
|-----------------------|------------|------------|------------|----------------------------------------------------------------------------------------------------------------------------------------------------------------------------------------------------------|
| 1030                  | [REDACTED] | [REDACTED] | [REDACTED] | University of California Los Angeles<br>(UCLA) Office For The Protection of<br>Research Subjects<br>Suite 102<br>11000 Kinross Avenue<br>Los Angeles, CA 90095<br>UNITED STATES                          |
| 1031                  | [REDACTED] | [REDACTED] | [REDACTED] | University of California San Diego<br>Human Research Protections<br>Program<br>East Campus Office Building<br>(ECOM)<br>9444 Medical Center Drive<br>First Floor<br>San Diego, CA 92093<br>UNITED STATES |

090177e183a72a9c\Approved\Approved On: 10-Oct-2012 02:11 (GMT)

| <u>Center</u> |            |            |            | <u>Institutional Review Board or Ethics Committee Address(es)</u>                                                              |
|---------------|------------|------------|------------|--------------------------------------------------------------------------------------------------------------------------------|
| 1035          | [REDACTED] | [REDACTED] | [REDACTED] | Quorum Review Institutional Review Board Incorporated<br>Suite 1000<br>1601 Fifth Avenue<br>Seattle, WA 98101<br>UNITED STATES |
| 1036          | [REDACTED] | [REDACTED] | [REDACTED] | Quorum Review Institutional Review Board Incorporated<br>Suite 1000<br>1601 Fifth Avenue<br>Seattle, WA 98101<br>UNITED STATES |
| 1044          | [REDACTED] | [REDACTED] | [REDACTED] | Quorum Review Institutional Review Board Incorporated<br>Suite 1000<br>1601 Fifth Avenue<br>Seattle, WA 98101<br>UNITED STATES |

Center  
1046

[REDACTED]

[REDACTED]

[REDACTED]

**Institutional Review Board or  
Ethics Committee Address(es)**  
University of North Texas Health  
Science Center at Fort Worth  
Institutional Review Board  
3400 Camp Bowie Boulevard  
Fort Worth, TX 76107  
UNITED STATES

1050

[REDACTED]

[REDACTED]

[REDACTED]

Quorum Review Institutional Review  
Board Incorporated  
Suite 1000  
1601 Fifth Avenue  
Seattle, WA 98101  
UNITED STATES

090177e183a72a9c\Approved\Approved On: 10-Oct-2012 02:11 (GMT)

090177e183a72a9c\Approved\Approved On: 10-Oct-2012 02:11 (GMT)

| <u>Center</u> |            |            |            | <u>Institutional Review Board or Ethics Committee Address(es)</u>                                                              |
|---------------|------------|------------|------------|--------------------------------------------------------------------------------------------------------------------------------|
| 1051          | [REDACTED] | [REDACTED] | [REDACTED] | Quorum Review Institutional Review Board Incorporated<br>Suite 1000<br>1601 Fifth Avenue<br>Seattle, WA 98101<br>UNITED STATES |
| 1063          | [REDACTED] | [REDACTED] | [REDACTED] | Quorum Review Institutional Review Board Incorporated<br>Suite 1000<br>1601 Fifth Avenue<br>Seattle, WA 98101<br>UNITED STATES |
| 1093          | [REDACTED] | [REDACTED] | [REDACTED] | Quorum Review Institutional Review Board Incorporated<br>Suite 1000<br>1601 Fifth Avenue<br>Seattle, WA 98101<br>UNITED STATES |

Center  
1096

[REDACTED]

**Institutional Review Board or  
Ethics Committee Address(es)**  
Quorum Review Institutional Review  
Board Incorporated  
Suite 1000  
1601 Fifth Avenue  
Seattle, WA 98101  
UNITED STATES

090177e183a72a9c\Approved\Approved On: 10-Oct-2012 02:11 (GMT)

**16.1.3.1 LIST OF INDEPENDENT ETHICS COMMITTEE (IEC) OR INSTITUTIONAL REVIEW BOARD (IRB)****ARGENTINA****Study Site Number   Independent Ethics Committee or Institutional Review Board Address(es)**

|      |                                                                                                                                          |
|------|------------------------------------------------------------------------------------------------------------------------------------------|
| 1024 | Comite de Etica en Investigacion Clinica (CEIC)<br>Larrea 1381, 3° "A",<br>Ciudad Autonoma de Bs. As, BUENOS AIRES C1117ABK<br>ARGENTINA |
| 1045 | Comite de Etica en Investigacion Clinica (CEIC)<br>Larrea 1381, 3° "A",<br>Ciudad Autonoma de Bs. As, BUENOS AIRES C1117ABK<br>ARGENTINA |
| 1256 | Comite de Etica en Investigacion Clinica (CEIC)<br>Larrea 1381, 3° "A",<br>Ciudad Autonoma de Bs. As, BUENOS AIRES C1117ABK<br>ARGENTINA |
| 1299 | Comite de Etica en Investigacion Clinica (CEIC)<br>Larrea 1381, 3° "A",<br>Ciudad Autonoma de Bs. As, BUENOS AIRES C1117ABK<br>ARGENTINA |



## AUSTRALIA

| <u>Study Site Number</u> | <u>Independent Ethics Committee or Institutional Review Board Address(es)</u>                                                                            |
|--------------------------|----------------------------------------------------------------------------------------------------------------------------------------------------------|
| 1089                     | Human Research Ethics Committee (TQEH/ LMH/ MH)<br>28 Woodville Road, The Queen Elizabeth Hospital<br>Woodville South, SOUTH AUSTRALIA 5011<br>AUSTRALIA |
| 1117                     | Bellberry Human Research Ethics Committee<br>129 Glen Osmond Road<br>Eastwood, SA 5063<br>AUSTRALIA                                                      |
| 1130                     | Bellberry Human Research Ethics Committee<br>129 Glen Osmond Road<br>Eastwood, SA 5063<br>AUSTRALIA                                                      |
| 1132                     | Bellberry Human Research Ethics Committee<br>129 Glen Osmond Road<br>Eastwood, SA 5063<br>AUSTRALIA                                                      |
| 1266                     | Human Research Ethics Committee (TQEH/ LMH/ MH)<br>28 Woodville Road, The Queen Elizabeth Hospital<br>Woodville South, SOUTH AUSTRALIA 5011<br>AUSTRALIA |

**BOSNIA AND HERZEGOVINA**

**Study Site Number   Independent Ethics Committee or Institutional Review Board Address(es)**

|      |                                                                                                       |
|------|-------------------------------------------------------------------------------------------------------|
| 1138 | Ethics Committee Tuzla<br>Trnovac bb<br>Tuzla, 75000<br>BOSNIA AND HERZEGOVINA                        |
| 1274 | EC Banja Luka<br>UL. Dvanaest bebe bb<br>Banja Luka, REPUBLIKA SRPAKA 78000<br>BOSNIA AND HERZEGOVINA |

090177e18bb7ac9d\Approved\Approved On: 12-Jun-2017 15:16 (GMT)

**BULGARIA**

| <b><u>Study Site Number</u></b> | <b><u>Independent Ethics Committee or Institutional Review Board Address(es)</u></b>             |
|---------------------------------|--------------------------------------------------------------------------------------------------|
| 1005                            | Ethics Committee for Multicenter Trials (ECMT)<br>Pl. Sveta Nedelya 5<br>Sofia, 1000<br>BULGARIA |
| 1021                            | Ethics Committee for Multicenter Trials (ECMT)<br>Pl. Sveta Nedelya 5<br>Sofia, 1000<br>BULGARIA |
| 1033                            | Ethics Committee for Multicenter Trials (ECMT)<br>Pl. Sveta Nedelya 5<br>Sofia, 1000<br>BULGARIA |
| 1068                            | Ethics Committee for Multicenter Trials<br>Pl. Sveta Nedelya 5<br>Sofia, 1000<br>BULGARIA        |
| 1086                            | Ethics Committee for Multicenter Trials<br>Pl. Sveta Nedelya 5<br>Sofia, 1000<br>BULGARIA        |
| 1171                            | Ethics Committee for Multicenter Trials (ECMT)<br>Pl. Sveta Nedelya 5<br>Sofia, 1000<br>BULGARIA |
| 1195                            | Ethics Committee for Multicenter Trials (ECMT)<br>Pl. Sveta Nedelya 5<br>Sofia, 1000<br>BULGARIA |

---

| <b><u>Study Site Number</u></b> | <b><u>Independent Ethics Committee or Institutional Review Board Address(es)</u></b>                                                                                               |
|---------------------------------|------------------------------------------------------------------------------------------------------------------------------------------------------------------------------------|
| 1206                            | Ethics Committee for Multicenter Trials (ECMT)<br>Pl. Sveta Nedelya 5<br>Sofia, 1000<br>BULGARIA                                                                                   |
| 1247                            | Local Laboratory at MHAT Ruse AD<br>2 Nezavisimost Str.<br>Ruse, 7200<br>BULGARIA<br><br>Ethics Committee for Multicenter Trials<br>Pl. Sveta Nedelya 5<br>Sofia, 1000<br>BULGARIA |
| 1271                            | Ethics Committee for Multicenter Trials<br>Pl. Sveta Nedelya 5<br>Sofia, 1000<br>BULGARIA                                                                                          |

CANADA

**Study Site Number**   **Independent Ethics Committee or Institutional Review Board Address(es)**

1052      IRB Services  
             372 Hollandview Trail, suite 300  
             Aurora, ON L4G 0A5  
             CANADA

1110      IRB Services  
             372 Hollandview Trail, suite 300  
             Aurora, ON L4G 0A5  
             CANADA

090177e18bb7ac9d\Approved\Approved On: 12-Jun-2017 15:16 (GMT)

## CHILE

| <u>Study Site Number</u> | <u>Independent Ethics Committee or Institutional Review Board Address(es)</u>                                                                                     |
|--------------------------|-------------------------------------------------------------------------------------------------------------------------------------------------------------------|
| 1048                     | Servicio de Salud Metropolitano Oriente. Comite de Etica Cientifico<br>Avenida Salvador 364, Providencia<br>Santiago, METROPOLITANA 7500922<br>CHILE              |
| 1060                     | Comite Etica de Investigacion Servicio de Salud Valdivia<br>Vicente Perez Rosales 590<br><br>Valdivia, XIV REGION 5110537<br>CHILE                                |
| 1114                     | Comite Etico Cientifico Hospital Dr. Gustavo<br>Fricke Servicio de Salud Vina del Mar-Quillota<br>Calle Limache 1307<br>Vina del Mar, VALPARAISO 2520563<br>CHILE |

**CZECH REPUBLIC****Study Site Number   Independent Ethics Committee or Institutional Review Board Address(es)**

|      |                                                                                                                                                                                                    |
|------|----------------------------------------------------------------------------------------------------------------------------------------------------------------------------------------------------|
| 1043 | Eticka komise IKEM a TN<br>Videnska 800<br>Praha 4 Krc, 14059<br>CZECH REPUBLIC                                                                                                                    |
| 1071 | Eticka komise IKEM a TN<br>Videnska 800<br>Praha 4 - Krc, 14059<br>CZECH REPUBLIC                                                                                                                  |
| 1164 | Eticka komise IKEM a TN<br>Videnska 800<br>Praha 4 - Krc, 14059<br>CZECH REPUBLIC                                                                                                                  |
| 1215 | Etická komise IKEM a TN<br>Videnska 800<br>Praha 4, 140 59<br>CZECH REPUBLIC                                                                                                                       |
| 1239 | Etická komise IKEM a TN<br>Videnska 800<br>Praha 4, 140 59<br>CZECH REPUBLIC<br><br>Eticka komise Vítkovicke nemocnice a.s.<br>Zaluzanskeho 1192/15<br>Ostrava, VITKOVICE 703 84<br>CZECH REPUBLIC |

**ESTONIA**

| <b><u>Study Site Number</u></b> | <b><u>Independent Ethics Committee or Institutional Review Board Address(es)</u></b> |
|---------------------------------|--------------------------------------------------------------------------------------|
| 1026                            | Tallinn Medical Research Ethics Committee<br>Hiiu 42<br>Tallinn, 11619<br>ESTONIA    |
| 1070                            | Tallinn Medical Research Ethics Committee<br>Hiiu 42<br>Tallinn, 11619<br>ESTONIA    |
| 1082                            | Tallinn Medical Research Ethics Committee<br>Hiiu 42<br>Tallinn, 11619<br>ESTONIA    |

090177e18bb7ac9d\Approved\Approved On: 12-Jun-2017 15:16 (GMT)



FRANCE

**Study Site Number**   **Independent Ethics Committee or Institutional Review Board Address(es)**

1212  
Helsinki Committee  
Hadassah Medical Center  
  
Jerusalem, 91120  
ISRAEL

090177e18bb7ac9d\Approved\Approved On: 12-Jun-2017 15:16 (GMT)

## ISRAEL

**Study Site Number** **Independent Ethics Committee or Institutional Review Board Address(es)**

|      |                                                                                                             |
|------|-------------------------------------------------------------------------------------------------------------|
| 1159 | The Helsinki Committee<br>The Chaim Sheba Medical Center<br><br>Tel-Hashomer, 5262000<br>ISRAEL             |
| 1212 | Helsinki Committee<br>Hadassah Medical Center<br><br>Jerusalem, 91120<br>ISRAEL                             |
| 1237 | Helsinki Committee<br>Bnai Zion Medical Center<br>43 Golomb st.<br>Haifa, 31048<br>ISRAEL                   |
| 1238 | Helsinki Committee<br>8 Haalya Hashnya St., POB 9602, Rambam Health Care Campus<br>Haifa, 3109601<br>ISRAEL |

**KOREA, REPUBLIC OF****Study Site Number   Independent Ethics Committee or Institutional Review Board Address(es)**

|      |                                                                                                                                                                                                                                                                    |
|------|--------------------------------------------------------------------------------------------------------------------------------------------------------------------------------------------------------------------------------------------------------------------|
| 1020 | Hanyang University Seoul Hospital IRB<br>222-1 Wangsimni-ro, Seongdong-gu<br>Seoul, 04763<br>KOREA, REPUBLIC OF                                                                                                                                                    |
| 1064 | Daegu Catholic University Medical Center IRB<br>Nam-gu, #33 Duryugongwon-ro<br>Daegu, 42472<br>KOREA, REPUBLIC OF<br><br>Covance Pharmaceutical R.&D. (Shanghai) Co. Ltd.<br>Nam-gu, #202 Geumgang Villa, 75 Duryugongwon-ro<br>Daegu, 42472<br>KOREA, REPUBLIC OF |
| 1123 | Konkuk University Medical Center IRB<br>120-1 Neungdong-ro, Gwangjin-gu<br>Seoul, 05030<br>KOREA, REPUBLIC OF                                                                                                                                                      |
| 1126 | Inha University Hospital IRB<br>27 Inhang-ro, Jung-gu, Jeongseok Bldg<br>Incheon, 22332<br>KOREA, REPUBLIC OF                                                                                                                                                      |
| 1129 | Chonnam National University Hospital IRB<br>42 Jebong-ro, Dong-gu<br>Gwangju, 61469<br>KOREA, REPUBLIC OF                                                                                                                                                          |
| 1150 | Kyungpook National University Hospital IRB<br>135 Dongdeok-ro, Jung-gu<br>Daegu, 41944<br>KOREA, REPUBLIC OF                                                                                                                                                       |

## LATVIA

**Study Site Number** **Independent Ethics Committee or Institutional Review Board Address(es)**

1032 Ethics Committee for Clinical Research  
Pauls Stradins Clinical University Hospital Development Society  
Pilsonu str 13  
Riga, LV1002  
LATVIA

1379 Ethics Committee for Clinical Research  
Pauls Stradins Clinical University Hospital Development Society  
Pilsonu str 13  
Riga, LV1002  
LATVIA

## LITHUANIA

**Study Site Number** **Independent Ethics Committee or Institutional Review Board Address(es)**

1037 Lithuanian Bioethics Committee  
Vilniaus str. 16  
Vilnius, LT-01402  
LITHUANIA

1146

1227 Lithuanian Bioethics Committee  
Vytauto str. 16  
Vilnius, LT-01402  
LITHUANIA

Lithuanian Bioethics Committee  
Didzioji str. 22  
Vilnius, LT-01128  
LITHUANIA

## MEXICO

**Study Site Number** **Independent Ethics Committee or Institutional Review Board Address(es)**

|      |                                                                                                                                                                                                                                                                                                                                                                                                                                                 |
|------|-------------------------------------------------------------------------------------------------------------------------------------------------------------------------------------------------------------------------------------------------------------------------------------------------------------------------------------------------------------------------------------------------------------------------------------------------|
| 1158 | Centro de Investigacion y Tratamiento Reumatologic<br>General Cano #130 Col. San Miguel , Chapultepec Del. Miguel Hidalgo<br>Mexico, DISTRITO FEDERAL 11850<br>MEXICO<br><br>Comite Bioetico para la Investigacion Clinica<br>Puebla 422-4, Colonia Roma Sur<br>Mexico, DISTRITO FEDERAL 06700<br>MEXICO<br><br>Comite de Etica en Investigacion de Mexico Centre<br>Puebla 422-4, Colonia Roma Sur<br>Mexico, DISTRITO FEDERAL 06700<br>MEXICO |
| 1203 | Comite de Etica en investigacion Facultad de Medicina<br>Facultad de Medicina, Universidad Autónoma de Coahuila, unidad Torreon.<br>Morelos 900, Ote, Colonia Centro<br>Torreon, COAHUILA 27000<br>MEXICO                                                                                                                                                                                                                                       |
| 1205 | Comite de Etica en Investigacion del Hospital Christus Muguerza del Parque S.A. de C.V.<br>Col. Centro<br>Dr. Pedro Leal Rodriguez 1802<br>Chihuahua, CHIHUAHUA 31000<br>MEXICO                                                                                                                                                                                                                                                                 |
| 1207 | Comite De Etica En Investigacion De Grupo Calyde S.C.P.<br>Colonia Residencial Pensiones, Calle 23 Diagonal x 11A1 y 7 No. 523.<br>Merida, YUCATAN 97217<br>MEXICO                                                                                                                                                                                                                                                                              |

| <b><u>Study Site Number</u></b> | <b><u>Independent Ethics Committee or Institutional Review Board Address(es)</u></b>                                                                                                              |
|---------------------------------|---------------------------------------------------------------------------------------------------------------------------------------------------------------------------------------------------|
| 1222                            | Comite de Etica en Investigacion<br>Centro Integral en Reumatologia S.A. de C.V.<br>Col. Americana, Av. La Paz No. 1917 y 1919<br>Guadalajara, JALISCO 44160<br>MEXICO                            |
| 1223                            | Comite de etica en investigacion Hospital Central Dr. Ignacio Morones Prieto<br>Av. Venustiano Carranza No. 2395, Colonia Zona Unviversitaria<br>San Luis Potosi, SAN LUIS POTOSI 78240<br>MEXICO |
| 1284                            | Comite de Etica en Investigacion de CEMSI, S.A. de C.V.<br>Blv. Pedro Maria Anaya 400, Colonia Chapultepec<br>Culiacan, SINALOA 80040<br>MEXICO                                                   |
| 1303                            | Comite de etica en investigacion de Mexico Centre for Clinical Research, S.A. de C.V.<br>Col. Del Valle, Amores no. 709<br>Mexico, DISTRITO FEDERAL 03100<br>MEXICO                               |

**NO SCA COUNTRY SPECIFIED**

| <u>Study Site Number</u> | <u>Independent Ethics Committee or Institutional Review Board Address(es)</u>                                   |
|--------------------------|-----------------------------------------------------------------------------------------------------------------|
| 1325                     | Quorum Review Institutional Review Board Inc.<br>1501 Fourth Ave, Ste 800<br>Seattle, WA 98101<br>UNITED STATES |

090177e18bb7ac9d\Approved\Approved On: 12-Jun-2017 15:16 (GMT)



## PERU

| <u>Study Site Number</u> | <u>Independent Ethics Committee or Institutional Review Board Address(es)</u>                                                                                                                        |
|--------------------------|------------------------------------------------------------------------------------------------------------------------------------------------------------------------------------------------------|
| 1078                     | Comite Institucional de Etica en Investigación<br>de la Universidad San Martin de Porres - Clinica CADAMUJER<br>Av. Alamenda del Corregidor 1531, Urb Los Sirius, La Molina<br>Lima, LIMA 12<br>PERU |
| 1157                     | Comite Institucional de Etica en la Investigacion de la Asociacion Benefica PRISMA<br>Calle Carlos Gonzales 251 Urb. Maranga, San Miguel.<br>Lima, LIMA 32<br>PERU                                   |
| 1163                     | Comite Institucional de Etica en Investigacion de<br>Calle Carlos Gonzales 251 Urb. Maranga, San Miguel., Etica en Investigacion de la Asociacion Benefica PRISMA<br>Lima, 32<br>PERU                |
| 1204                     | Comite Institucional de Etica en Investigacion de la Asociacion Benefica Prisma<br>Calle Carlos Gonzales 251 Urb. Maranga, San Miguel.<br>Lima, LIMA 32<br>PERU                                      |

**PHILIPPINES**

| <b><u>Study Site Number</u></b> | <b><u>Independent Ethics Committee or Institutional Review Board Address(es)</u></b>                                                                                                                   |
|---------------------------------|--------------------------------------------------------------------------------------------------------------------------------------------------------------------------------------------------------|
| 1004                            | Mary Mediatrix Medical Center Research Ethics Review Committee<br>JP Laurel Highway<br>Lipa City, BATANGAS 4217<br>PHILIPPINES                                                                         |
| 1014                            | University of the Philippines Manila-Research Ethics Board<br>547 Pedro Gil Street, Ermita, College of Medicine, UP Manila, 2nd Floor Paz Mendoza Building<br>Manila, METRO MANILA 1000<br>PHILIPPINES |
| 1023                            | Brokenshire Integrated Health Ministries, Inc., Review Ethics Committee<br>Brokenshire Integrated Health Ministries, Inc., Madapo Hills<br>Davao, DAVAO DEL SUR 8000<br>PHILIPPINES                    |
| 1036                            | Iloilo Doctors' Hospital, Inc. Ethics Review Committee<br>West Avenue, Molo, Iloilo Doctors' Hospital, Inc.<br>Iloilo City, ILOILO 5000<br>PHILIPPINES                                                 |
| 1062                            | St. Luke's Institutional Ethics Review Committee<br>Annex III 5th Floor, Research Biotechnology Division<br>E. Rodriguez Ave.<br>Quezon City, METRO MANILA 1102<br>PHILIPPINES                         |
| 1076                            | DDH - Institutional Ethics Review Committee<br>118 East Quirino Avenue, Davao Doctors Hospital, 4th Floor Oncology Building<br>Davao City, 8000<br>PHILIPPINES                                         |
| 1118                            | St. Paul's Hospital of Iloilo, Inc. - IRB<br>Institutional Review Board, General Luna Street<br>Iloilo City, ILOILO 5000<br>PHILIPPINES                                                                |

| <b><u>Study Site Number</u></b> | <b><u>Independent Ethics Committee or Institutional Review Board Address(es)</u></b>                                                                                                                                                                                                                                                                                                                                                    |
|---------------------------------|-----------------------------------------------------------------------------------------------------------------------------------------------------------------------------------------------------------------------------------------------------------------------------------------------------------------------------------------------------------------------------------------------------------------------------------------|
| 1288                            | Jose R. Reyes Memorial Medical Center IRB/IEC<br>Rizal Avenue, Sta. Cruz<br>Manila, METRO MANILA 1003<br>PHILIPPINES                                                                                                                                                                                                                                                                                                                    |
| 1294                            | Perpetual Succour Hospital Institutional Ethics and Review Board<br>Room 501, SPC medical specialty center<br>Gorordo Avenue<br>Cebu city, CEBU 6000<br>PHILIPPINES                                                                                                                                                                                                                                                                     |
| 1327                            | Far Eastern University-Nicanor Reyes Medical Foundation Institutional Ethics Review Committee<br>Regalado Avenue near Dahlia Street, West Fairview, Rm 219, 2nd Floor, Institute of Medicine<br>Quezon, METROMANILA 1118<br>PHILIPPINES<br><br>FEU-NRMF Institutional Ethics Review Committee<br>Regalado Avenue near Dahlia Street, West Fairview, Rm 219, 2nd Floor, Institute of Medicine<br>Quezon, METROMANILA 1118<br>PHILIPPINES |

## POLAND

| <u>Study Site Number</u> | <u>Independent Ethics Committee or Institutional Review Board Address(es)</u>                                                            |
|--------------------------|------------------------------------------------------------------------------------------------------------------------------------------|
| 1008                     | Komisja Bioetyczna przy Okregowej Radzie<br>ul. Nowowiejskiego 51, Lekarskiej Wielkopolskiej Izby Lekarskiej<br>Poznan, 61-734<br>POLAND |
| 1009                     | Komisja Bioetyczna przy Okregowej Radzie<br>ul. Nowowiejskiego 51, Lekarskiej Wielkopolskiej Izby Lekarskiej<br>Poznan, 61-734<br>POLAND |
| 1013                     | Komisja Bioetyczna przy Okregowej Radzie Lekarskiej Wielkopolskiej Izby Lekarskiej<br>ul. Nowowiejskiego 51<br>Poznan, 61-734<br>POLAND  |
| 1049                     | Komisja Bioetyczna przy Okregowej Radzie Lekarskiej Wielkopolskiej Izby Lekarskiej<br>ul. Nowowiejskiego 51<br>Poznan, 61-734<br>POLAND  |
| 1055                     | Komisja Bioetyczna przy Okregowej Radzie Lekarskiej Wielkopolskiej Izby Lekarskiej<br>ul. Nowowiejskiego 51<br>Poznan, 61-734<br>POLAND  |
| 1083                     | Komisja Bioetyczna przy Okregowej Radzie Lekarskiej Wielkopolskiej Izby Lekarskiej<br>ul. Nowowiejskiego 51<br>Poznan, 61-734<br>POLAND  |
| 1104                     | Komisja Bioetyczna przy Okregowej Radzie Lekarskiej Wielkopolskiej Izby Lekarskiej<br>ul. Nowowiejskiego 51<br>Poznan, 61-734<br>POLAND  |

| <b><u>Study Site Number</u></b> | <b><u>Independent Ethics Committee or Institutional Review Board Address(es)</u></b>                                                     |
|---------------------------------|------------------------------------------------------------------------------------------------------------------------------------------|
| 1135                            | Komisja Bioetyczna przy Okregowej Radzie Lekarskiej Wielkopolskiej Izby Lekarskiej<br>ul. Nowowiejskiego 51<br>Poznan, 61-734<br>POLAND  |
| 1154                            | Komisja Bioetyczna przy Okregowej Radzie Lekarskiej Wielkopolskiej Izby Lekarskiej<br>ul. Nowowiejskiego 51<br>Poznan, 61-734<br>POLAND  |
| 1155                            | Komisja Bioetyczna przy Okregowej Radzie Lekarskiej Wielkopolskiej Izby Lekarskiej<br>ul. Nowowiejskiego 51<br>Poznan, 61-734<br>POLAND  |
| 1156                            | Komisja Bioetyczna przy Okregowej Radzie Lekarskiej Wielkopolskiej Izby Lekarskiej<br>ul. Nowowiejskiego 51<br>Poznan, 61-734<br>POLAND  |
| 1178                            | Komisja Bioetyczna przy Okregowej Radzie Lekarskiej Wielkopolskiej Izby Lekarskiej<br>ul. Nowowiejskiego 51<br>Poznan, 61-734<br>POLAND  |
| 1188                            | Komisja Bioetyczna przy Okregowej Radzie Lekarskiej Wielkopolskiej Izby Lekarskiej<br>ul. Nowowiejskiego 51<br>Poznan, 61-734<br>POLAND  |
| 1390                            | Komisja Bioetyczna przy Okregowej Radzie Lekarskiej<br>ul. Nowowiejskiego 51, Wielkopolskiej Izby Lekarskiej<br>Poznan, 61-734<br>POLAND |

## ROMANIA

| <u>Study Site Number</u> | <u>Independent Ethics Committee or Institutional Review Board Address(es)</u>                                                                            |
|--------------------------|----------------------------------------------------------------------------------------------------------------------------------------------------------|
| 1018                     | Comisia Nationala de Bioetica a Medicamentului si a Dispozitivelor Medicale<br>Sos. Stefan cel Mare, nr. 19-21, sector 2<br>Bucuresti, 020125<br>ROMANIA |
| 1034                     | Comisia Nationala de Bioetica a Medicamentului si a Dispozitivelor Medicale<br>Sos. Stefan cel Mare, nr. 19-21, sector 2<br>Bucuresti, 020125<br>ROMANIA |
| 1047                     | Comisia Nationala de Bioetica a Medicamentului si a Dispozitivelor Medicale<br>Sos. Stefan cel Mare, nr. 19-21, sector 2<br>Bucuresti, 020125<br>ROMANIA |
| 1240                     | Comisia Nationala de Bioetica a Medicamentului si a Dispozitivelor Medicale<br>Sos. Stefan cel Mare, nr. 19-21, sector 2<br>Bucuresti, 020125<br>ROMANIA |
| 1241                     | Comisia Nationala de Bioetica a Medicamentului si a Dispozitivelor Medicale<br>Sos. Stefan cel Mare, nr. 19-21, sector 2<br>Bucuresti, 020125<br>ROMANIA |
| 1289                     | Comisia Nationala de Bioetica a Medicamentului si a Dispozitivelor Medicale<br>Sos. Stefan cel Mare, nr. 19-21, sector 2<br>Bucuresti, 020125<br>ROMANIA |
| 1336                     | Comisia Nationala de Bioetica a Medicamentului si a Dispozitivelor Medicale<br>Sos. Stefan cel Mare, nr. 19-21, sector 2<br>Bucuresti, 020125<br>ROMANIA |

| <b><u>Study Site Number</u></b> | <b><u>Independent Ethics Committee or Institutional Review Board Address(es)</u></b>                                                                     |
|---------------------------------|----------------------------------------------------------------------------------------------------------------------------------------------------------|
| 1337                            | Comisia Nationala de Bioetica a Medicamentului si a Dispozitivelor Medicale<br>Sos. Stefan cel Mare, nr. 19-21, sector 2<br>Bucuresti, 020125<br>ROMANIA |
| 1348                            | Comisia Nationala de Bioetica a Medicamentului si a Dispozitivelor Medicale<br>Sos. Stefan cel Mare, nr. 19-21, sector 2<br>Bucuresti, 020125<br>ROMANIA |
| 1349                            | Comisia Nationala de Bioetica a Medicamentului si a Dispozitivelor Medicale<br>Sos. Stefan cel Mare, nr. 19-21, sector 2<br>Bucuresti, 020125<br>ROMANIA |
| 1362                            | Comisia Nationala de Bioetica a Medicamentului si a Dispozitivelor Medicale<br>sector 2, Sos. Stefan cel Mare, nr. 19-21<br>Bucuresti, 020125<br>ROMANIA |
| 1363                            | Comisia Nationala de Bioetica a Medicamentului si a Dispozitivelor Medicale<br>Sos. Stefan cel Mare, nr. 19-21, sector 2<br>Bucuresti, 020125<br>ROMANIA |

## RUSSIAN FEDERATION

**Study Site Number** **Independent Ethics Committee or Institutional Review Board Address(es)**

|      |                                                                                                                                                                                                                                                                                                                |
|------|----------------------------------------------------------------------------------------------------------------------------------------------------------------------------------------------------------------------------------------------------------------------------------------------------------------|
| 1006 | <p>Ethics Council of the Ministry of Healthcare of the Russian Federation<br/>3, Rakhmanovskiy per.<br/>Moscow, 127994<br/>RUSSIAN FEDERATION</p> <p>Ethics Committee of SHI "Regional Clinical Hospital<br/>1, Smirnovskoe Ushelye<br/>Saratov, 410053<br/>RUSSIAN FEDERATION</p>                             |
| 1028 | <p>Ethics Committee at CJSC "European Medical Center"<br/>33a, Oktybrskaya str.<br/>Moscow, 123104<br/>RUSSIAN FEDERATION</p> <p>Ethics Council of the Ministry of Healthcare of the Russian Federation<br/>3, Rakhmanovskiy per.<br/>Moscow, 127994<br/>RUSSIAN FEDERATION</p>                                |
| 1038 | <p>Ethics Council of the Ministry of Healthcare of the Russian Federation<br/>3, Rakhmanovskiy per.<br/>Moscow, 127994<br/>RUSSIAN FEDERATION</p> <p>Ethics Committee of SBEI HPE Novosibirsk State Medical University of MoH of RF<br/>52, Krasny Prospekt<br/>Novosibirsk, 630091<br/>RUSSIAN FEDERATION</p> |
| 1039 | <p>Ethics Committee at NHI "Regional Hospital at Smolensk Station of OJSC "Russian Railways"<br/>15, 1st Krasnoflotskiy Pereulok<br/>Smolensk, 214025<br/>RUSSIAN FEDERATION</p>                                                                                                                               |



| <b><u>Study Site Number</u></b> | <b><u>Independent Ethics Committee or Institutional Review Board Address(es)</u></b>                                                                                    |
|---------------------------------|-------------------------------------------------------------------------------------------------------------------------------------------------------------------------|
|                                 | Ethics Council of the Ministry of Healthcare of the Russian Federation<br>3, Rakhmanovskiy per.<br>Moscow, 127994<br>RUSSIAN FEDERATION                                 |
| 1073                            | Ethics Council of the Ministry of Healthcare of Russian Federation<br>3, Rakhmanovskiy per.<br>Moscow, 127994<br>RUSSIAN FEDERATION                                     |
|                                 | Ethics Committee of SBEI HPE First Moscow State Medical University n.a. I.M.Sechenov of MoH of RF<br>bld.1, 8, Trubetskaya str.<br>Moscow, 119991<br>RUSSIAN FEDERATION |
| 1099                            | Local Ethics Committee at SBEI HPE Orenburg State Medical Academy of MoH of RF<br>6, Sovetskaya str.<br>Orenburg, 460000<br>RUSSIAN FEDERATION                          |
|                                 | Ethics Council of the Ministry of Healthcare of the Russian Federation<br>3, Rakhmanovskiy per.<br>Moscow, 127994<br>RUSSIAN FEDERATION                                 |
| 1100                            | Ethics Committee of SHI of YR Clinical Emergency Hospital n.a. N.V.Solovyev<br>11 Zagorodniy Sad str.<br>Yaroslavl, 150003<br>RUSSIAN FEDERATION                        |
|                                 | Ethics Council of the Ministry of Healthcare of Russian Federation<br>3, Rakhmanovskiy per.<br>Moscow, 127994<br>RUSSIAN FEDERATION                                     |

| <b><u>Study Site Number</u></b> | <b><u>Independent Ethics Committee or Institutional Review Board Address(es)</u></b>                                                                                                                                                                                                                                    |
|---------------------------------|-------------------------------------------------------------------------------------------------------------------------------------------------------------------------------------------------------------------------------------------------------------------------------------------------------------------------|
| 1127                            | <p>Ethics Council of the Ministry of Healthcare of the Russian Federation<br/>3, Rakhmanovskiy per.<br/>Moscow, 127994<br/>RUSSIAN FEDERATION</p> <p>LEC at State Budgetary Institution of Ryazan Region "Regional Clinical Cardiology Dispensary"<br/>96, Stroykova str.<br/>Ryazan, 390026<br/>RUSSIAN FEDERATION</p> |
| 1128                            | <p>Ethics Council of the Ministry of Healthcare of Russian Federation<br/>3, Rakhmanovskiy per.<br/>Moscow, 127994<br/>RUSSIAN FEDERATION</p> <p>Ethics Committee of SBHI of YR "Clinical Hospital #3"<br/>61, Mayakovskogo str.<br/>Yaroslavl, 150007<br/>RUSSIAN FEDERATION</p>                                       |
| 1142                            | <p>Ethics Council of the Ministry of Healthcare of the Russian Federation<br/>3, Rakhmanovskiy per.<br/>Moscow, 127994<br/>RUSSIAN FEDERATION</p> <p>Committee on Ethics and Evidence-based Medical Research Studies at the GAUZ KOKB<br/>22, prospekt Oktyabrskiy<br/>Kemerovo, 650066<br/>RUSSIAN FEDERATION</p>      |
| 1308                            | <p>Ethics Council of the Ministry of Healthcare of the Russian Federation<br/>3, Rakhmanovskiy per.<br/>Moscow, 127994<br/>RUSSIAN FEDERATION</p>                                                                                                                                                                       |

| <b><u>Study Site Number</u></b> | <b><u>Independent Ethics Committee or Institutional Review Board Address(es)</u></b>                                                                                                                                                                                                                                                                    |
|---------------------------------|---------------------------------------------------------------------------------------------------------------------------------------------------------------------------------------------------------------------------------------------------------------------------------------------------------------------------------------------------------|
|                                 | Local Ethics Committee of Limited Liability Company AVA-PETER<br>55a, Liteiniy Prospect<br>Saint Petersburg, 191014<br>RUSSIAN FEDERATION                                                                                                                                                                                                               |
| 1328                            | Ethics Council of the Ministry of Healthcare of the Russian Federation<br>3, Rakhmanovskiy per.<br>Moscow, 127994<br>RUSSIAN FEDERATION<br><br>Ethics Committee of State Budgetary Healthcare<br>3, Pirogova str., Institution of Karelia Republic "Republic Hospital n.a. V.A. Baranov"<br>Petrozavodsk, KARELIA REPUBLIC 185019<br>RUSSIAN FEDERATION |
| 1381                            | Ethics Council of the Ministry of Healthcare of the Russian Federation<br>3, Rakhmanovskiy per.<br>Moscow, 127994<br>RUSSIAN FEDERATION<br><br>Commission of Medical Ethics at SBHI "Samara Regional Clinical Hospital n.a. V.D.Seredavin"<br>159, Tashkentskaya str.<br>Samara, 443095<br>RUSSIAN FEDERATION                                           |

**SOUTH AFRICA**

| <b><u>Study Site Number</u></b> | <b><u>Independent Ethics Committee or Institutional Review Board Address(es)</u></b>                                                                                |
|---------------------------------|---------------------------------------------------------------------------------------------------------------------------------------------------------------------|
| 1145                            | University of the Witwatersrand, Johannesburg, Human Research Ethics Committee: (Medical)<br>Private Bag x2600, Suite 189<br>Houghton, GAUTENG 2041<br>SOUTH AFRICA |
| 1180                            | Phama-Ethics (Pty) Ltd.<br>123 Amcor Road<br>Lyttelton Manor, GAUTENG 0157<br>SOUTH AFRICA                                                                          |
| 1194                            | Phama-Ethics (Pty) Ltd.<br>123 Amcor Road<br>Lyttelton Manor, GAUTENG 0157<br>SOUTH AFRICA                                                                          |
| 1197                            | Phama-Ethics (Pty) Ltd.<br>123 Amcor Road<br>Lyttelton Manor, GAUTENG 0157<br>SOUTH AFRICA                                                                          |
| 1209                            | Phama-Ethics (Pty) Ltd.<br>123 Amcor Road<br>Lyttelton Manor, GAUTENG 0157<br>SOUTH AFRICA                                                                          |
| 1232                            | Phama-Ethics (Pty) Ltd.<br>123 Amcor Road<br>Lyttelton Manor, GAUTENG 0157<br>SOUTH AFRICA                                                                          |
| 1250                            | Phama-Ethics (Pty) Ltd.<br>123 Amcor Road<br>Lyttelton Manor, GAUTENG 0157<br>SOUTH AFRICA                                                                          |

| <b><u>Study Site Number</u></b> | <b><u>Independent Ethics Committee or Institutional Review Board Address(es)</u></b>                                                                                                                                                                                                                |
|---------------------------------|-----------------------------------------------------------------------------------------------------------------------------------------------------------------------------------------------------------------------------------------------------------------------------------------------------|
| 1251                            | Phama-Ethics (Pty) Ltd.<br>123 Amcor Road<br>Lyttelton Manor, GAUTENG 0157<br>SOUTH AFRICA                                                                                                                                                                                                          |
| 1268                            | The Research Ethics Committee, Faculty of Health Sciences, University of Pretoria<br>Private Bag X323, Arcadia<br>Pretoria, GAUTENG 0007<br>SOUTH AFRICA                                                                                                                                            |
| 1311                            | University of the Witwatersrand, Johannesburg, Human Research Ethics Committee: (Medical)<br>Private Bag x2600, Suite 189<br>Houghton, GAUTENG 2041<br>SOUTH AFRICA<br><br>University of the Witwatersrand, Johannesburg,<br>Private Bag x2600, Suite 189<br>Houghton, GAUTENG 2041<br>SOUTH AFRICA |

## SPAIN

**Study Site Number** **Independent Ethics Committee or Institutional Review Board Address(es)**

1029 Comite Coordinador de Etica de la Investigacion Biomedica de Andalucia  
Avda. de la Innovacion s/n. Edificio Arena 1  
Sevilla, SEVILLA 41071  
SPAIN

1030 CEIC Fundación Jiménez Díaz - UTE  
Avda. Reyes Católicos, 2 - 2ª  
Madrid, 28040  
SPAIN

Comite Coordinador de Etica de la Investigacion Biomedica de Andalucia  
Avda. de la Innovacion s/n. Edificio Arena 1  
Sevilla, SEVILLA 41071  
SPAIN

1061 Comite Coordinador de Etica de la Investigacion Biomedica de Andalucia  
Avda. de la Innovacion s/n. Edificio Arena 1  
Sevilla, SEVILLA 41071  
SPAIN

1111 Comite Coordinador de Etica de la Investigacion  
Avda. de la Innovacion s/n. Edificio Arena 1  
Sevilla, SEVILLA 41007  
SPAIN

1201 CEIC Hospital Universitario Virgen del Rocío  
Edificio de Laboratorios - Planta 6ª  
Avda. Manuel Siurot, s/n.  
Sevilla, 41013  
SPAIN

Comite Coordinador de Etica de la Investigacion Biomedica de Andalucia  
Avda. de la Innovacion s/n. Edificio Arena 1  
Sevilla, SEVILLA 41071  
SPAIN

**Study Site Number**    **Independent Ethics Committee or Institutional Review Board Address(es)**

1312

CEI Provincial de Málaga

Avda. Carlos Haya, s/n Pabellón A 7ª Planta, Hospital Regional Universitario de Málaga

Malaga, 29010

SPAIN

Comite Coordinador de Etica de la Investigacion Biomedica de Andalucia

Avda. de la Innovacion s/n. Edificio Arena 1

Sevilla, SEVILLA 41071

SPAIN

## TAIWAN

| <u>Study Site Number</u> | <u>Independent Ethics Committee or Institutional Review Board Address(es)</u>                                                                              |
|--------------------------|------------------------------------------------------------------------------------------------------------------------------------------------------------|
| 1063                     | Kaohsiung Veterans General Hospital<br>No.386, Ta- Chung First Road,, Institutional Review Board<br>Kaohsiung, 81362<br>TAIWAN                             |
| 1147                     | Kaohsiung Medical University Chung-Ho Memorial Hospital-Institutional Review Board<br>No. 100 Tzyou 1st Road<br>Kaohsiung, 807<br>TAIWAN                   |
| 1162                     | Chung Shan Medical University Hospital-IRB<br>No.110, Sec 1, Chien-Kuo N. Road<br>Taichung, 402<br>TAIWAN                                                  |
| 1184                     | Chang Gung Medical Foundation- IRB<br>No.199, Tung-Hwa North Road<br>Taipei, 105<br>TAIWAN                                                                 |
| 1214                     | Taipei Veterans General Hospital, IRB<br>No. 201, Shih Pai Road, Sec. 2<br>Taipei, 11217<br>TAIWAN                                                         |
| 1226                     | Hualien Tzu Chi Hospital, Buddhist Tzu Chi Medical Foundation- Research Ethics Committee<br>707, Sec. 3, Chung-Yang Rd.,<br>Hualien, R.O.C 97002<br>TAIWAN |



## THAILAND

| <u>Study Site Number</u> | <u>Independent Ethics Committee or Institutional Review Board Address(es)</u>                                                                                                                                                                                                                                                                     |
|--------------------------|---------------------------------------------------------------------------------------------------------------------------------------------------------------------------------------------------------------------------------------------------------------------------------------------------------------------------------------------------|
| 1101                     | The Institutional Review Board Royal Thai Army Medical Department<br>317 Rajavithi Rd, Rajathevee<br>Bangkok, 10400<br>THAILAND                                                                                                                                                                                                                   |
| 1140                     | The Siriraj Institutional Review Board<br>Anniversary 5th December 2007 Building, 2 Wanglang Road, Bangkoknoi, 2nd floor His Majesty the King's 80th Birthday<br>Bangkok, 10700<br>THAILAND                                                                                                                                                       |
| 1315                     | Ethical Clearance Committee on Human Rights Related to Researches Involving Human Subjects<br>Faculty of Medicine, Ramathibodi Hospital, Mahidol University<br>Mahidol University. 270 Rama VI Road, Ratchathewi, Ethics Research in Human Unit, 3rd Floor, Research and Welfares Building<br>Ramathibodi Hospital,<br>Bangkok, 10400<br>THAILAND |
| 1316                     | Human Research Ethics Committee Faculty of Medicine<br>15, Kamjanavanit Road, Prince of Songkla University<br>Hat Yai, SONGKHLA 90110<br>THAILAND                                                                                                                                                                                                 |

**TURKEY****Study Site Number** **Independent Ethics Committee or Institutional Review Board Address(es)**

|      |                                                                                                                                                                    |
|------|--------------------------------------------------------------------------------------------------------------------------------------------------------------------|
| 1122 | Ankara Universitesi Tip Fakultesi Klinik Arastirmalar Etik Kurulu<br>Sihhiye, Ankara Universitesi Tip Fakultesi Morfoloji Binasi<br>Ankara, 06100<br>TURKEY        |
| 1124 | Ankara Universitesi Klinik Arastirmalar Etik Kurulu<br>Sihhiye, Kurulu Sekreteryasi, Ankara Universitesi Tip Fakultesi Morfoloji Binasi<br>Ankara, 06100<br>TURKEY |
| 1364 | Ankara Universitesi Tip Fakultesi Klinik<br>Ankara Universitesi Tip Fakultesi Morfoloji Binasi, Sihhiye, Arastirmalar Etik Kurulu<br>Ankara, 06100<br>TURKEY       |

**UNITED KINGDOM****Study Site Number** **Independent Ethics Committee or Institutional Review Board Address(es)**

1065 NRES Committee North East - York  
Room 001, Jarrow Business Centre

Jarrow, NORTH EAST NE32 3DT  
UNITED KINGDOM

1102 NRES Committee North East - York  
Room 001, Jarrow Business Centre  
Rolling Mill Road  
Jarrow, NORTH EAST NE32 3DT  
UNITED KINGDOM

1218 NRES Committee North East - York  
Room 001, Jarrow Business Centre

Jarrow, NORTH EAST NE32 3DT  
UNITED KINGDOM

1243 NRES Committee North East - York  
Room 001, Jarrow Business Centre  
Rolling Mill Road  
Jarrow, NORTH EAST NE32 3DT  
UNITED KINGDOM

1272 NRES Committee North East - York  
Room 001, Jarrow Business Centre

Jarrow, NORTH EAST NE32 3DT  
UNITED KINGDOM

## UNITED STATES

**Study Site Number** **Independent Ethics Committee or Institutional Review Board Address(es)**

|      |                                                                                                                 |
|------|-----------------------------------------------------------------------------------------------------------------|
| 1001 | Quorum Review Institutional Review Board Inc.<br>1501 Fourth Ave, Ste 800<br>Seattle, WA 98101<br>UNITED STATES |
| 1002 | Quorum Review Institutional Review Board Inc.<br>1501 Fourth Ave, Ste 800<br>Seattle, WA 98101<br>UNITED STATES |
| 1019 | Quorum Review Institutional Review Board Inc.<br>1501 Fourth Ave, Ste 800<br>Seattle, WA 98101<br>UNITED STATES |
| 1046 | Quorum Review Institutional Review Board Inc.<br>1501 Fourth Ave, Ste 800<br>Seattle, WA 98101<br>UNITED STATES |
| 1057 | Quorum Review IRB<br>1501 Fourth Ave, Ste 800<br>Seattle, WA 98101<br>UNITED STATES                             |
| 1098 | Quorum Review Institutional Review Board Inc.<br>1501 Fourth Ave, Ste 800<br>Seattle, WA 98101<br>UNITED STATES |
| 1112 | Quorum Review Institutional Review Board Inc.<br>1501 Fourth Ave, Ste 800<br>Seattle, WA 98101<br>UNITED STATES |

| <b><u>Study Site Number</u></b> | <b><u>Independent Ethics Committee or Institutional Review Board Address(es)</u></b>                                                        |
|---------------------------------|---------------------------------------------------------------------------------------------------------------------------------------------|
| 1119                            | Quorum Review Institutional Review Board Inc.<br>1501 Fourth Ave, Ste 800<br>Seattle, WA 98101<br>UNITED STATES                             |
| 1131                            | Quorum Review Institutional Review Board Inc.<br>1501 Fourth Ave, Ste 800<br>Seattle, WA 98101<br>UNITED STATES                             |
| 1133                            | Ochsner Clinic Foundation Institutional Review Board<br>1514 Jefferson Hwy<br>New Orleans, LA 70121<br>UNITED STATES                        |
| 1134                            | Quorum Review IRB<br>1501 Fourth Ave, Ste 800<br>Seattle, WA 98101<br>UNITED STATES                                                         |
| 1141                            | Office of the Human Research Protection Program (OHRPP)<br>Box 951694, 11000 Kinross Ave, Ste 211<br>Los Angeles, CA 90095<br>UNITED STATES |
| 1152                            | Quorum Review Institutional Review Board Inc.<br>1501 Fourth Ave, Ste 800<br>Seattle, WA 98101<br>UNITED STATES                             |
| 1165                            | Quorum Review Institutional Review Board Inc.<br>1501 Fourth Ave, Ste 800<br>Seattle, WA 98101<br>UNITED STATES                             |

| <b><u>Study Site Number</u></b> | <b><u>Independent Ethics Committee or Institutional Review Board Address(es)</u></b>                            |
|---------------------------------|-----------------------------------------------------------------------------------------------------------------|
| 1166                            | Quorum Review Institutional Review Board Inc.<br>1501 Fourth Ave, Ste 800<br>Seattle, WA 98101<br>UNITED STATES |
| 1167                            | Quorum Review Institutional Review Board Inc.<br>1501 Fourth Ave, Ste 800<br>Seattle, WA 98101<br>UNITED STATES |
| 1173                            | Quorum Review Institutional Review Board Inc.<br>1501 Fourth Ave, Ste 800<br>Seattle, WA 98101<br>UNITED STATES |
| 1181                            | Trinity Hospitals, Institutional Review Board<br>One Burdick Expy W<br>Minot, ND 58701<br>UNITED STATES         |
| 1186                            | Quorum Review Institutional Review Board Inc.<br>1501 Fourth Ave, Ste 800<br>Seattle, WA 98101<br>UNITED STATES |
| 1187                            | Quorum Review IRB<br>1501 Fourth Ave, Ste 800<br>Seattle, WA 98101<br>UNITED STATES                             |
| 1189                            | Quorum Review Institutional Review Board Inc.<br>1501 Fourth Ave, Ste 800<br>Seattle, WA 98101<br>UNITED STATES |

| <b><u>Study Site Number</u></b> | <b><u>Independent Ethics Committee or Institutional Review Board Address(es)</u></b>                            |
|---------------------------------|-----------------------------------------------------------------------------------------------------------------|
| 1190                            | Quorum Review IRB<br>1501 Fourth Ave, Ste 800<br>Seattle, WA 98101<br>UNITED STATES                             |
| 1193                            | Quorum Review Institutional Review Board Inc.<br>1501 Fourth Ave, Ste 800<br>Seattle, WA 98101<br>UNITED STATES |
| 1200                            | Quorum Review Institutional Review Board Inc.<br>1501 Fourth Ave, Ste 800<br>Seattle, WA 98101<br>UNITED STATES |
| 1210                            | Quorum Review Institutional Review Board Inc.<br>1501 Fourth Ave, Ste 800<br>Seattle, WA 98101<br>UNITED STATES |
| 1213                            | Quorum Review IRB<br>1501 Fourth Ave, Ste 800<br>Seattle, WA 98101<br>UNITED STATES                             |
| 1220                            | Quorum Review Institutional Review Board Inc.<br>1501 Fourth Ave, Ste 800<br>Seattle, WA 98101<br>UNITED STATES |
| 1221                            | Quorum Review IRB<br>1501 Fourth Ave, Ste 800<br>Seattle, WA 98101<br>UNITED STATES                             |

| <b><u>Study Site Number</u></b> | <b><u>Independent Ethics Committee or Institutional Review Board Address(es)</u></b>                            |
|---------------------------------|-----------------------------------------------------------------------------------------------------------------|
| 1230                            | Quorum Review Institutional Review Board Inc.<br>1501 Fourth Ave, Ste 800<br>Seattle, WA 98101<br>UNITED STATES |
| 1291                            | Quorum Review Institutional Review Board Inc.<br>1501 Fourth Ave, Ste 800<br>Seattle, WA 98101<br>UNITED STATES |
| 1318                            | Quorum Review Institutional Review Board Inc.<br>1501 Fourth Ave, Ste 800<br>Seattle, WA 98101<br>UNITED STATES |
| 1319                            | Quorum Review Institutional Review Board Inc.<br>1501 Fourth Ave, Ste 800<br>Seattle, WA 98101<br>UNITED STATES |
| 1321                            | Quorum Review IRB<br>1501 Fourth Ave, Ste 800<br>Seattle, WA 98101<br>UNITED STATES                             |
| 1322                            | Quorum Review Institutional Review Board Inc.<br>1501 Fourth Ave, Ste 800<br>Seattle, WA 98101<br>UNITED STATES |
| 1323                            | Quorum Review Institutional Review Board Inc.<br>1501 Fourth Ave, Ste 800<br>Seattle, WA 98101<br>UNITED STATES |



| <b><u>Study Site Number</u></b> | <b><u>Independent Ethics Committee or Institutional Review Board Address(es)</u></b>                                                                                         |
|---------------------------------|------------------------------------------------------------------------------------------------------------------------------------------------------------------------------|
| 1324                            | University of Southern California Health Sciences<br>Campus Institutional Review Board, 1200 N State St, General Hospital Ste 4700<br>Los Angeles, CA 90033<br>UNITED STATES |
| 1332                            | Quorum Review Institutional Review Board Inc.<br>1501 Fourth Ave, Ste 800<br>Seattle, WA 98101<br>UNITED STATES                                                              |
| 1333                            | Quorum Review Institutional Review Board Inc.<br>1501 Fourth Ave, Ste 800<br>Seattle, WA 98101<br>UNITED STATES                                                              |
| 1334                            | Quorum Review IRB<br>1501 Fourth Ave, Ste 800<br>Seattle, WA 98101<br>UNITED STATES                                                                                          |
| 1345                            | Quorum Review Institutional Review Board Inc.<br>1501 Fourth Ave, Ste 800<br>Seattle, WA 98101<br>UNITED STATES                                                              |
| 1346                            | Quorum Review Institutional Review Board Inc.<br>1501 Fourth Ave, Ste 800<br>Seattle, WA 98101<br>UNITED STATES                                                              |
| 1351                            | Quorum Review Institutional Review Board Inc.<br>1501 Fourth Ave, Ste 800<br>Seattle, WA 98101<br>UNITED STATES                                                              |

**Study Site Number**   **Independent Ethics Committee or Institutional Review Board Address(es)**

|      |                                                                                                                 |
|------|-----------------------------------------------------------------------------------------------------------------|
| 1352 | Quorum Review Institutional Review Board Inc.<br>1501 Fourth Ave, Ste 800<br>Seattle, WA 98101<br>UNITED STATES |
| 1353 | Quorum Review Institutional Review Board Inc.<br>1501 Fourth Ave, Ste 800<br>Seattle, WA 98101<br>UNITED STATES |
| 1356 | Quorum Review Institutional Review Board Inc.<br>1501 Fourth Ave, Ste 800<br>Seattle, WA 98101<br>UNITED STATES |
| 1357 | Quorum Review Institutional Review Board Inc.<br>1501 Fourth Ave, Ste 800<br>Seattle, WA 98101<br>UNITED STATES |
| 1359 | Quorum Review Institutional Review Board Inc.<br>1501 Fourth Ave, Ste 800<br>Seattle, WA 98101<br>UNITED STATES |
| 1360 | Quorum Review Institutional Review Board Inc.<br>1501 Fourth Ave, Ste 800<br>Seattle, WA 98101<br>UNITED STATES |
| 1375 | Quorum Review Institutional Review Board Inc.<br>1501 Fourth Ave, Ste 800<br>Seattle, WA 98101<br>UNITED STATES |

| <b><u>Study Site Number</u></b> | <b><u>Independent Ethics Committee or Institutional Review Board Address(es)</u></b>                            |
|---------------------------------|-----------------------------------------------------------------------------------------------------------------|
| 1376                            | Quorum Review Institutional Review Board Inc.<br>1501 Fourth Ave, Ste 800<br>Seattle, WA 98101<br>UNITED STATES |
| 1385                            | Quorum Review Institutional Review Board Inc.<br>1501 Fourth Ave, Ste 800<br>Seattle, WA 98101<br>UNITED STATES |
| 1398                            | Quorum Review Institutional Review Board Inc.<br>1501 Fourth Ave, Ste 800<br>Seattle, WA 98101<br>UNITED STATES |
| 1405                            | Quorum Review Institutional Review Board Inc.<br>1501 Fourth Ave, Ste 800<br>Seattle, WA 98101<br>UNITED STATES |
| 1406                            | Quorum Review Institutional Review Board Inc.<br>1501 Fourth Ave, Ste 800<br>Seattle, WA 98101<br>UNITED STATES |

### 16.1.3.1 LIST OF INDEPENDENT ETHICS COMMITTEE (IEC) OR INSTITUTIONAL REVIEW BOARD (IRB)

#### ARGENTINA

| <u>Study Site Number</u> | <u>Independent Ethics Committee or Institutional Review Board Address(es)</u>                                                                                                                                                                                                                                                                         |
|--------------------------|-------------------------------------------------------------------------------------------------------------------------------------------------------------------------------------------------------------------------------------------------------------------------------------------------------------------------------------------------------|
| 1080                     | Comite Independiente de Etica para Ensayos en Farmacologia Clinica<br>Fundación de Estudios Farmacologicos y de Medicamentos (FEFyM)<br>J.E. Uriburu 774, Piso 1°<br>Buenos Aires, CABA C1027AAP<br>ARGENTINA                                                                                                                                         |
| 1081                     | Comite Independiente de Etica para Ensayos en Farmacologia Clinica<br>Fundación de Estudios Farmacologicos y de Medicamentos (FEFyM)<br>J.E. Uriburu 774, Piso 1°<br>Buenos Aires, CABA C1027AAP<br>ARGENTINA                                                                                                                                         |
| 1082                     | Comite de Etica para Ensayos en Farmacologia Clinica "Investigaciones Reumatologicas y Osteologicas - IRO"<br>J.E. Uriburu 1170, Piso 1°<br>Buenos Aires, CABA C1114AAH<br>ARGENTINA                                                                                                                                                                  |
| 1083                     | Comite Independiente de Etica para Ensayos en Farmacologia Clinica<br>Fundación de Estudios Farmacologicos y de Medicamentos (FEFyM)<br>J.E. Uriburu 774, Piso 1°<br>Buenos Aires, C1027AAP<br>ARGENTINA<br><br>Comite de Investigacion y Etica de Saint Dennis Medical Group S. A.<br>Av. Rivadavia 2206- 6°A<br>Buenos Aires, C1034ACO<br>ARGENTINA |
| 1614                     | Comite Independiente de Etica Para Ensayos en Farmacologia Clinica<br>Fundación de Estudios Farmacologicos y de Medicamentos (FEFyM)<br>J.E. Uriburu 774- Piso 1°<br>Buenos Aires, CABA C1027AAP<br>ARGENTINA                                                                                                                                         |

## AUSTRALIA

**Study Site Number** **Independent Ethics Committee or Institutional Review Board Address(es)**

|      |                                                                                                                                                                         |
|------|-------------------------------------------------------------------------------------------------------------------------------------------------------------------------|
| 1262 | Bellberry Limited Human Research Ethics Committee<br>129 Glen Osmond Road<br>Eastwood, SA 5063<br>AUSTRALIA                                                             |
| 1263 | Central Northern Adelaide Health Service<br>Ethics of Human Research Committee, Queen Elizabeth Hospital<br>28 Woodville Road,<br>Woodville, SA 5011<br>AUSTRALIA       |
| 1264 | Cabrini Human Research Ethics Committee<br>183 Wattletree Road<br>Malvern, VIC 3144<br>AUSTRALIA                                                                        |
| 1272 | Northern Sydney / Central Coast Area Health Service<br>Human Research Ethics Committee, Royal North Shore Hospital<br>Pacific Hwy<br>St Leonards, NSW 2065<br>AUSTRALIA |
| 1273 | Royal Perth Hospital Ethics Committee,<br>Royal Perth Hospital, Wellington Street Campus, Wellington Street<br>Perth, WA 6000<br>AUSTRALIA                              |
| 1577 | Bellberry Human Research Ethics Committee<br>129 Glen Osmond Road<br>Eastwood, SA 5063<br>AUSTRALIA                                                                     |

## AUSTRIA

| <u>Study Site Number</u> | <u>Independent Ethics Committee or Institutional Review Board Address(es)</u>                                                                               |
|--------------------------|-------------------------------------------------------------------------------------------------------------------------------------------------------------|
| 1041                     | Ethikkommission der Stadt Wien<br>Geschaeftsfuehrung: Gesundheitsdienst der Stadt Wien (MA 15), TownTown, Thomas-Klestil-Platz 8<br>Wien, A-1030<br>AUSTRIA |
| 1588                     | Ethikkommission der Stadt Wien<br>gemaess KAG, AMG und MPG, Town Town<br>Thomas-Klestil-Platz 8<br>Wien, A-1030<br>AUSTRIA                                  |
| 1589                     | Ethikkommission der Stadt Wien<br>gemaess KAG, AMG und MPG, Town Town<br>Thomas-Klestil-Platz 8<br>Wien, A-1030<br>AUSTRIA                                  |

**BELGIUM**

| <b><u>Study Site Number</u></b> | <b><u>Independent Ethics Committee or Institutional Review Board Address(es)</u></b>        |
|---------------------------------|---------------------------------------------------------------------------------------------|
| 1046                            | Ethisch Comite Universitair Ziekenhuis Gent<br>De Pintelaan 185<br>Gent, 9000<br>BELGIUM    |
| 1599                            | Ethisch Comite Universitair Ziekenhuis Gent<br>De Pintelaan 185<br>Gent, 9000<br>BELGIUM    |
| 1600                            | Ethisch Committee Universitair Ziekenhuis Gent<br>De Pintelaan 185<br>Gent, 9000<br>BELGIUM |
| 1602                            | Ethisch Committee Universitair Ziekenhuis Gent<br>De Pintelaan 185<br>Gent, 9000<br>BELGIUM |

**BOSNIA AND HERZEGOVINA**

| <u>Study Site Number</u> | <u>Independent Ethics Committee or Institutional Review Board Address(es)</u>                                           |
|--------------------------|-------------------------------------------------------------------------------------------------------------------------|
| 1462                     | Ethics Committee of the University Clinical Center Sarajevo<br>Bolnicka 25<br>Sarajevo, 71000<br>BOSNIA AND HERZEGOVINA |

090177e18c5470f7\Approved\Approved On: 05-Oct-2017 23:40 (GMT)



**BRAZIL****Study Site Number** **Independent Ethics Committee or Institutional Review Board Address(es)**

|      |                                                                                                                                                                                                                   |
|------|-------------------------------------------------------------------------------------------------------------------------------------------------------------------------------------------------------------------|
| 1042 | Comite de Etica em Pesquisa do UGA I - Hospital Heliopolis<br>Rua Conego Xavier, 276 - 10th floor<br>Sao Paulo, SAO PAULO 04231-030<br>BRAZIL                                                                     |
| 1043 | Comite de Etica em Pesquisa do Hospital Alberto Rassi - HGG<br>Av. Anhanguera, 6479 - Setor Oeste<br>Goiania, GO 74110-010<br>BRAZIL                                                                              |
| 1044 | Comissao de Etica para Analise de Projetos de Pesquisa (CAPPesq)<br>Hospital das Clinicas e da Faculdade de Medicina da USP<br>Rua Dr. Ovidio Pires de Campos, 225, sala 505<br>Sao Paulo, SP 05403-010<br>BRAZIL |
| 1045 | Comite de Etica em Pesquisa em Seres Humanos do HC-UFPR<br>Rua General Carneiro, 181<br>Curitiba, PARANA 80060-900<br>BRAZIL                                                                                      |
| 1148 | Comite de Etica em Pesquisa do Hospital de Clinicas de Porto Alegre - HCPA<br>Rua Ramiro Barcelos, 2350, Sala 2200 B - Santana<br>Porto Alegre, RS 90035-903<br>BRAZIL                                            |
| 1185 | Comite de Etica em Pesquisa do Hospital Alemao Oswaldo Cruz<br>Rua Joao Juliao, 331 - 14° andar, Bela Vista<br>Sao Paulo, SP 01323-903<br>BRAZIL                                                                  |
| 1440 | Comite de Etica em Pesquisa do Instituto de Infectologia Emilio Ribas<br>Av. Dr. Arnaldo, 165 Cerqueira Cesar<br>Sao Paulo, SP 01246-900<br>BRAZIL                                                                |

**Study Site Number**   **Independent Ethics Committee or Institutional Review Board Address(es)**

1441      Comite de Ética em Pesquisa da Pontificia Universidade Católica do Rio Grande do Sul  
Avenida Ipiranga, 6690 - Build 50<sup>th</sup> - Room 703  
Porto Alegre, RS 90610-900  
BRAZIL

1442      Comitê de Ética em Pesquisa em Seres Humanos do Hospital Pro-Cardiaco  
Rua Voluntarios da Patria, 435 – 8<sup>th</sup> floor  
Rio de Janeiro, RIO DE JANEIRO 22270-005  
BRAZIL

**BULGARIA**

| <b><u>Study Site Number</u></b> | <b><u>Independent Ethics Committee or Institutional Review Board Address(es)</u></b>      |
|---------------------------------|-------------------------------------------------------------------------------------------|
| 1130                            | Ethics Committee for Multicenter Trials<br>pl. Sveta Nedelya 5<br>Sofia, 1000<br>BULGARIA |
| 1132                            | Ethics Committee for Multicenter Trials<br>pl. Sveta Nedelya 5<br>Sofia, 1000<br>BULGARIA |
| 1133                            | Ethics Committee for Multicenter Trials<br>pl. Sveta Nedelya 5<br>Sofia, 1000<br>BULGARIA |
| 1134                            | Ethics Committee for Multicenter Trials<br>pl. Sveta Nedelya 5<br>Sofia, 1000<br>BULGARIA |
| 1448                            | Ethics Committee for Multicenter Trials<br>pl. Sveta Nedelya 5<br>Sofia, 1000<br>BULGARIA |
| 1449                            | Ethics Committee for Multicenter Trials<br>pl. Sveta Nedelya 5<br>Sofia, 1000<br>BULGARIA |
| 1533                            | Ethics Committee for Multicenter Trials<br>pl. Sveta Nedelya 5<br>Sofia, 1000<br>BULGARIA |

---

| <b><u>Study Site Number</u></b> | <b><u>Independent Ethics Committee or Institutional Review Board Address(es)</u></b>                                                       |
|---------------------------------|--------------------------------------------------------------------------------------------------------------------------------------------|
| 1621                            | Ethics Committee for Multicenter Trials<br>Etichna komisiya za mnogocentrovi izpitvaniya<br>pl. Sveta Nedelya 5<br>Sofia, 1000<br>BULGARIA |
| 1622                            | Ethics Committee for Multicenter Trials<br>pl. Sveta Nedelya 5<br>Sofia, 1000<br>BULGARIA                                                  |
| 1670                            | Ethics Committee for Multicenter Trials<br>pl. Sveta Nedelya 5<br>Sofia, 1000<br>BULGARIA                                                  |

## CANADA

| <u>Study Site Number</u> | <u>Independent Ethics Committee or Institutional Review Board Address(es)</u>                                                                                      |
|--------------------------|--------------------------------------------------------------------------------------------------------------------------------------------------------------------|
| 1391                     | IRB Services<br>372 Hollandview Trail, Suite 300,<br>Aurora, ON L4G OA5<br>CANADA                                                                                  |
| 1392                     | IRB Services<br>372 Hollandview Trail, Suite 300<br>Aurora, ON L4G OA5<br>CANADA                                                                                   |
| 1394                     | IRB Services<br>372 Hollandview Trail, Suite 300<br>Aurora, ON L4G OA5<br>CANADA                                                                                   |
| 1395                     | IRB Services<br>372 Hollandview Trail, Suite 300<br>Aurora, ON L4G OA5<br>CANADA                                                                                   |
| 1396                     | IRB Services<br>372 Hollandview Trail, Suite 300<br>Aurora, ON L4G OA5<br>CANADA                                                                                   |
| 1397                     | IRB Services<br>372 Hollandview Trail, Suite 300<br>Aurora, ON L4G OA5<br>CANADA                                                                                   |
| 1398                     | Health Research Ethics Board of Alberta - Clinical Trials Committee<br>Alberta Innovates-Health Solutions, 1500-10104 103 Ave NW<br>Edmonton, AB T5J 4A7<br>CANADA |

| <b><u>Study Site Number</u></b> | <b><u>Independent Ethics Committee or Institutional Review Board Address(es)</u></b>                                                                                                                                                        |
|---------------------------------|---------------------------------------------------------------------------------------------------------------------------------------------------------------------------------------------------------------------------------------------|
| 1399                            | IRB Services<br>372 Hollandview Trail, Suite 300<br>Aurora, ON L4G 0A5<br>CANADA                                                                                                                                                            |
| 1401                            | IRB Services<br>372 Hollandview Trail, Suite 300<br>Aurora, ON L4G 0A5<br>CANADA                                                                                                                                                            |
| 1402                            | IRB Services<br>372 Hollandview Trail, Suite 300<br>Aurora, ON L4G 0A5<br>CANADA                                                                                                                                                            |
| 1403                            | University of Saskatchewan BioMedical Research Ethics Board (Bio-REB)<br>Research Ethics Office, University of Saskatchewan, NRC - Plant Biotechnology Research Institute<br>1607 - 110 Gymnasium Place,<br>Saskatoon, SK S7N 4J8<br>CANADA |
| 1404                            | Office of Research Ethics The University of Western Ontario<br>Supporting Services Building<br>Rm 5150<br>London, ON N6A 3K7<br>CANADA                                                                                                      |
| 1406                            | IRB Services<br>372 Hollandview Trail, Suite 300<br>Aurora, ON L4G 0A5<br>CANADA                                                                                                                                                            |
| 1542                            | IRB Services<br>372 Hollandview Trail, Suite 300<br>Aurora, ON L4G 0A5<br>CANADA                                                                                                                                                            |

| <b><u>Study Site Number</u></b> | <b><u>Independent Ethics Committee or Institutional Review Board Address(es)</u></b> |
|---------------------------------|--------------------------------------------------------------------------------------|
| 1543                            | IRB Services<br>372 Hollandview Trail, Suite 300<br>Aurora, ON L4G 0A5<br>CANADA     |
| 1544                            | IRB Services<br>372 Hollandview Trail, Suite 300<br>Aurora, ON L4G 0A5<br>CANADA     |
| 1545                            | IRB Services<br>372 Hollandview Trail, Suite 300<br>Aurora, ON L4G 0A5<br>CANADA     |
| 1584                            | IRB Services<br>372 Hollandview Trail, Suite 300<br>Aurora, ON L4G 0A5<br>CANADA     |
| 1585                            | IRB Services<br>372 Hollandview Trail, Suite 300<br>Aurora, ON L4G 0A5<br>CANADA     |
| 1586                            | IRB Services<br>372 Hollandview Trail, Suite 300<br>Aurora, ON L4G 0A5<br>CANADA     |
| 1587                            | IRB Services<br>372 Hollandview Trail, Suite 300<br>Aurora, ON L4G 0A5<br>CANADA     |

## CHILE

**Study Site Number** **Independent Ethics Committee or Institutional Review Board Address(es)**

|      |                                                                                                                                                          |
|------|----------------------------------------------------------------------------------------------------------------------------------------------------------|
| 1066 | Comite Etico Cientifico Servicio de Salud Metropolitano Oriente<br>Avenida Salvador 364<br>Santiago, RM 7500922<br>CHILE                                 |
| 1090 | Comite Etico Cientifico del Servicio de Salud Vina-Quillota<br>Esquina Penablanca, Piso 2, Calle Limache 1307<br>Vina del Mar, V REGION 2520563<br>CHILE |
| 1145 | Comite Etico Cientifico Servicio de Salud Metropolitano Oriente<br>Avenida Salvador 364<br>Santiago, RM 7500922<br>CHILE                                 |
| 1173 | Comite Etico Cientifico<br>Servicio de Salud Metropolitano Central<br>Victoria Subercaseaux 381, Primer Piso<br>Santiago, RM<br>CHILE                    |
| 1174 | Comite Etico Cientifico, Servicio de Salud Metropolitano Oriente<br>Avenida Salvador 364<br>Providencia Santiago, RM 7500922<br>CHILE                    |
| 1527 | Comite Etico Cientifico<br>Servicio de Salud Metropolitano Oriente<br>Avenida Salvador 364<br>Providencia, SANTIAGO RM 7500922<br>CHILE                  |



**Study Site Number**    **Independent Ethics Committee or Institutional Review Board Address(es)**

1591                      Comite de Evaluacion Etica Cientifica Servicio de Salud Araucania Sur  
                                 Andres Bello # 636  
                                 Temuco, IX REGION 4791301  
                                 CHILE

1671                      Comite Etica de Investigacion Servicio de Salud Valdivia  
                                 Vicente Perez Rosalez 560  
                                 Valdivia, REGION XIV 5110537  
                                 CHILE

090177e18c5470f7\Approved\Approved On: 05-Oct-2017 23:40 (GMT)

## CHINA

| <b><u>Study Site Number</u></b> | <b><u>Independent Ethics Committee or Institutional Review Board Address(es)</u></b>                                                       |
|---------------------------------|--------------------------------------------------------------------------------------------------------------------------------------------|
| 1316                            | EC of Peking University People's Hospital<br>No.11, Xizhimen South Street, Xicheng District<br>Beijing, 100044<br>CHINA                    |
| 1317                            | EC of Peking University People's Hospital<br>No.11, Xizhimen South Street, Xicheng District<br>Beijing, 100044<br>CHINA                    |
| 1319                            | Ethic Committee of Beijing Chao Yang Hospital<br>No.8, Baijiazhuang, Chao Yang District<br>Beijing, 100020<br>CHINA                        |
| 1320                            | Ethics Committee of Renji Hospital Shanghai Jiao Tong University School of Medicine<br>No. 1630 Dongfang Road<br>Shanghai, 200127<br>CHINA |
| 1321                            | EC of Peking University People's Hospital<br>No.11, Xizhimen South Street, Xicheng District<br>Beijing, 100044<br>CHINA                    |
| 1322                            | EC of Peking University People's Hospital<br>No.11, Xizhimen South Street, Xicheng District<br>Beijing, 100044<br>CHINA                    |
| 1323                            | EC of The Third Affiliated Hospital Of Sun Yat-sen University<br>Tianhe Road, No.600<br>Guangzhou, GUANGDONG 510630<br>CHINA               |

**Study Site Number**   **Independent Ethics Committee or Institutional Review Board Address(es)**

|      |                                                                                                                                                                                                                                                                       |
|------|-----------------------------------------------------------------------------------------------------------------------------------------------------------------------------------------------------------------------------------------------------------------------|
| 1324 | EC of Peking University People's Hospital<br>No.11, Xizhimen South Street, Xicheng District<br>Beijing, 100044<br>CHINA                                                                                                                                               |
| 1326 | Ethic Committee of QiLu Hospital of Shandong University<br>107 Western Culture Road<br>Jinan, SHANDONG 250012<br>CHINA                                                                                                                                                |
| 1327 | EC of Peking University People's Hospital<br>No.11, Xizhimen South Street, Xicheng District<br>Beijing, 100044<br>CHINA                                                                                                                                               |
| 1328 | Ethic Committee of Xijing Hospital, The Fourth Military Medical University<br>No. 15 Changlexi Road<br>Xi'an, SHAAN'XI 710032<br>CHINA<br><br>EC of Peking University People's Hospital<br>No.11, Xizhimen South Street, Xicheng District<br>Beijing, 100044<br>CHINA |
| 1329 | EC of Peking University People's Hospital<br>No.11, Xizhimen South Street, Xicheng District<br>Beijing, 100044<br>CHINA                                                                                                                                               |
| 1330 | EC of Peking University People's Hospital<br>No.11, Xizhimen South Street, Xicheng District<br>Beijing, 100044<br>CHINA                                                                                                                                               |

**Study Site Number**   **Independent Ethics Committee or Institutional Review Board Address(es)**

|      |                                                                                                                                                                                                                                                                                         |
|------|-----------------------------------------------------------------------------------------------------------------------------------------------------------------------------------------------------------------------------------------------------------------------------------------|
| 1331 | EC of Peking University People's Hospital<br>No.11, Xizhimen South Street, Xicheng District<br>Beijing, 100044<br>CHINA<br><br>Ethics Committee of the Second Affiliated Hospital of Zhejiang University School of Medicine<br>No.88 Jiefang Road<br>Hangzhou, ZHEJIANG 310009<br>CHINA |
| 1332 | Ethics Committee of Jiangsu Province Hospital<br>No.300 Guangzhou Road, Gulou District<br>Nanjing, JIANGSU 210029<br>CHINA                                                                                                                                                              |
| 1333 | EC of the First Affiliated Hospital of Soochow University<br>No.188 Shizi Street<br>Suzhou, JIANGSU 215006<br>CHINA                                                                                                                                                                     |
| 1334 | EC of Peking University People's Hospital<br>No.11, Xizhimen South Street, Xicheng District<br>Beijing, 100044<br>CHINA                                                                                                                                                                 |
| 1335 | Ethics Committee of Xiangya Hospital of Central-South University<br>No. 87 Xiangya Road<br>Changsha, Hunan, 410008<br>CHINA<br><br>EC of Peking University People's Hospital<br>No.11, Xizhimen South Street, Xicheng District<br>Beijing, 100044<br>CHINA                              |

**Study Site Number**    **Independent Ethics Committee or Institutional Review Board Address(es)**

1336                    EC of Peking University People's Hospital  
No.11, Xizhimen South Street, Xicheng District  
Beijing, 100044  
CHINA

1337                    Ethics Committee of Tianjin Medical University General Hospital  
No.154, AnShan Road, HePing District  
Tianjin, 300052  
CHINA

EC of Peking University People's Hospital  
No.11, Xizhimen South Street, Xicheng District  
Beijing, 100044  
CHINA

090177e18c5470f7\Approved\Approved On: 05-Oct-2017 23:40 (GMT)

## COLOMBIA

**Study Site Number** **Independent Ethics Committee or Institutional Review Board Address(es)**

|      |                                                                                                                                                   |
|------|---------------------------------------------------------------------------------------------------------------------------------------------------|
| 1350 | Comite de Etica de la Investigacion Riesgo de Fractura S.A.<br>Carrera 13 No. 97-25<br>Bogota D.C., CUNDINAMARCA<br>COLOMBIA                      |
| 1353 | Comite de Investigacion y Etica en Investigacion Hospital Pablo Tobon Uribe<br>Calle 78 B No. 69-240<br>Medellin, Antioquia<br>Colombia           |
| 1355 | Comite de Etica en Investigacion de SERVIMED EU<br>Calle 51 # 34-17, Consultorio #208, CC Cabecera, Etapa I<br>Bucaramanga, SANTANDER<br>COLOMBIA |
| 1521 | Comite de Etica en Investigacion Clinica de La Costa Ltda.<br>Carrera 50 # 80-90, Piso 2<br>Barranquilla, ATLANTICO<br>COLOMBIA                   |
| 1583 | Comite de Etica de la Investigacion Riesgo de Fractura S.A.<br>Carrera 13 No. 97-25<br>Bogota D.C., CUNDINAMARCA<br>COLOMBIA                      |

**COSTA RICA****Study Site Number** **Independent Ethics Committee or Institutional Review Board Address(es)**

|      |                                                                                                                                                                                                                 |
|------|-----------------------------------------------------------------------------------------------------------------------------------------------------------------------------------------------------------------|
| 1435 | UCIMED Comité Ético Científico de la Universidad de Ciencias Médicas<br>De las oficinas del ICE en Sabana Norte<br>200 metros al nor-este, edificio esquinero, segundo piso<br>San José, SAN JOSE<br>COSTA RICA |
| 1437 | UCIMED Comité Ético Científico de la Universidad de Ciencias Médicas<br>400 mts Oeste del Ministerio de Agricultura y Ganadería, Sabana Oeste<br>San José<br>COSTA RICA                                         |
| 1582 | Instituto Costarricense de Investigaciones Clínicas<br>Urbanización Los Árboles, Frente al CENARE<br>La Uruca, SAN JOSE<br>COSTA RICA                                                                           |

## CROATIA

| <u>Study Site Number</u> | <u>Independent Ethics Committee or Institutional Review Board Address(es)</u>                                                       |
|--------------------------|-------------------------------------------------------------------------------------------------------------------------------------|
| 1147                     | CENTRAL ETHICS COMMITTEE<br>Ksaverska cesta 4<br>Zagreb, 10000<br>CROATIA                                                           |
| 1187                     | CENTRAL ETHICS COMMITTEE<br>Ksaverska cesta 4<br>Zagreb, 21000<br>CROATIA                                                           |
| 1458                     | Central Ethics Committee<br>Ksaverska Cesta 4, Agency for Medicinal Products and Medical Devices<br>Zagreb, ZAGREB 10000<br>CROATIA |
| 1461                     | Central Ethics Committee<br>Ksaverska Cesta 4, Agency for Medicinal Products and Medical Devices<br>Zagreb, ZAGREB 10000<br>CROATIA |
| 1463                     | Central Ethics Committee<br>Ksaverska Cesta 4, Agency for Medicinal Products and Medical Devices<br>Zagreb, ZAGREB 10000<br>CROATIA |



**CZECH REPUBLIC****Study Site Number   Independent Ethics Committee or Institutional Review Board Address(es)**

|      |                                                                                                     |
|------|-----------------------------------------------------------------------------------------------------|
| 1122 | Eticka komise IKEM a FTNsP<br>Videnska 800<br>Praha 4 Krc, 140 59<br>CZECH REPUBLIC                 |
| 1123 | Eticka komise IKEM a FTNsP<br>Videnska 800<br>Praha 4 Krc, 140 59<br>CZECH REPUBLIC                 |
| 1124 | Eticka komise IKEM a FTNsP<br>Videnska 800<br>Praha 4 Krc, 140 59<br>CZECH REPUBLIC                 |
| 1125 | Eticka komise IKEM a FTNsP<br>Videnska 800<br>Praha 4 Krc, 140 59<br>CZECH REPUBLIC                 |
| 1126 | Eticka komise IKEM a FTNsP<br>Videnska 800<br>Praha 4 Krc, 140 59<br>CZECH REPUBLIC                 |
| 1127 | Eticka komise IKEM a FTNsP<br>Videnska 800<br>Praha 4 Krc, 140 59<br>CZECH REPUBLIC                 |
|      | Eticka komise Fakultni nemocnice u sv. Anny v Brne<br>Pekarska 53<br>Brno, 656 91<br>CZECH REPUBLIC |

| <b><u>Study Site Number</u></b> | <b><u>Independent Ethics Committee or Institutional Review Board Address(es)</u></b>    |
|---------------------------------|-----------------------------------------------------------------------------------------|
| 1274                            | Eticka komise IKEM a FTNsP<br>Videnska 800<br>Praha 4 Krc, 140 59<br>CZECH REPUBLIC     |
| 1275                            | Eticka komise IKEM a FTNsP<br>Videnska 800<br>Praha 4 Krc, 140 59<br>CZECH REPUBLIC     |
| 1276                            | Eticka komise IKEM a FTNsP<br>Videnska 800<br>Praha 4 Krc, 140 59<br>CZECH REPUBLIC     |
| 1277                            | Eticka komise IKEM a FTNsP<br>Videnska 800<br>Praha 4 Krc, 140 59<br>CZECH REPUBLIC     |
| 1278                            | Eticka komise IKEM a FTNsP<br>Videnska 800<br>Praha 4 Krc, 140 59<br>CZECH REPUBLIC     |
| 1279                            | Eticka komise IKEM a FTNsP<br>Videnska 800<br>Praha 4 Krc, 140 59<br>CZECH REPUBLIC     |
| 1314                            | Eticka komise fakultni nemocnice Brno<br>Jihlavska 20<br>Brno, 625 00<br>CZECH REPUBLIC |

**Study Site Number**   **Independent Ethics Committee or Institutional Review Board Address(es)**

|      |                                                                                                             |
|------|-------------------------------------------------------------------------------------------------------------|
|      | Eticka komise IKEM a FTNsP<br>Videnska 800<br>Praha 4 Krc, 140 59<br>CZECH REPUBLIC                         |
| 1315 | Eticka komise IKEM a FTNsP<br>Videnska 800<br>Praha 4 Krc, 140 59<br>CZECH REPUBLIC                         |
| 1603 | Eticka komise Fakultni nemocnice Hradec Kralove<br>Sokolska 581<br>Hradec Kralove, 500 05<br>CZECH REPUBLIC |
|      | Eticka komise IKEM a FTNsP<br>Videnska 800<br>Praha 4 Krc, 140 59<br>CZECH REPUBLIC                         |
| 1605 | Eticka komise IKEM a FTNsP<br>Videnska 800<br>Praha 4 Krc, 140 59<br>CZECH REPUBLIC                         |

**DENMARK**

| <u>Study Site Number</u> | <u>Independent Ethics Committee or Institutional Review Board Address(es)</u>                                        |
|--------------------------|----------------------------------------------------------------------------------------------------------------------|
| 1347                     | De Videnskabetiske Komitéer for Region Hovedstaden, Regionsgaarden<br>Kongens Vaenge 2<br>Hilleroed, 3400<br>DENMARK |

090177e18c5470f7\Approved\Approved On: 05-Oct-2017 23:40 (GMT)

**DOMINICAN REPUBLIC**

| <u>Study Site Number</u> | <u>Independent Ethics Committee or Institutional Review Board Address(es)</u>                                                                 |
|--------------------------|-----------------------------------------------------------------------------------------------------------------------------------------------|
| 1226                     | CONABIOS (Consejo Nacional de Bioetica en Salud)<br>Avenida Bolivar 902, La Julia<br>Santo Domingo, SANTO DOMINGO 10109<br>DOMINICAN REPUBLIC |

090177e18c5470f7\Approved\Approved On: 05-Oct-2017 23:40 (GMT)

## FINLAND

| <u>Study Site Number</u> | <u>Independent Ethics Committee or Institutional Review Board Address(es)</u>                                             |
|--------------------------|---------------------------------------------------------------------------------------------------------------------------|
| 1248                     | Helsingin ja Uudenmaan sairaanhoitopiirin eettinen toimikunta<br>Biomedicum Helsinki 2 C, PL 705<br>HUS, 00029<br>FINLAND |
| 1249                     | Helsingin ja Uudenmaan sairaanhoitopiirin eettinen toimikunta<br>Biomedicum Helsinki 2 C, PL 705<br>HUS, 00029<br>FINLAND |
| 1390                     | Helsingin ja Uudenmaan sairaanhoitopiirin eettinen toimikunta<br>Biomedicum Helsinki 2 C, PL 705<br>HUS, 00029<br>FINLAND |

## FRANCE

| <u>Study Site Number</u> | <u>Independent Ethics Committee or Institutional Review Board Address(es)</u>                               |
|--------------------------|-------------------------------------------------------------------------------------------------------------|
| 1635                     | CPP Ile de France V<br>Hopital Saint-Antoine<br>184 rue du faubourg Saint-Antoine<br>Paris, 75012<br>FRANCE |
| 1637                     | CPP Ile de France V<br>Hopital Saint-Antoine<br>184 rue du faubourg Saint-Antoine<br>Paris, 75012<br>FRANCE |
| 1638                     | CPP Ile de France V<br>Hopital Saint-Antoine<br>184 rue du faubourg Saint-Antoine<br>Paris, 75012<br>FRANCE |
| 1639                     | CPP Ile de France V<br>Hopital Saint-Antoine<br>184 rue du faubourg Saint-Antoine<br>Paris, 75012<br>FRANCE |

## GERMANY

**Study Site Number** **Independent Ethics Committee or Institutional Review Board Address(es)**

|      |                                                                                                          |
|------|----------------------------------------------------------------------------------------------------------|
| 1151 | Ethikkommission bei der Saechsischen Landesaeztekammer<br>Schuetzenhoehe 16<br>Dresden, 01099<br>GERMANY |
| 1152 | Ethikkommission bei der Saechsischen Landesaeztekammer<br>Schuetzenhoehe 16<br>Dresden, 01099<br>GERMANY |
| 1157 | Ethikkommission bei der Saechsischen Landesaeztekammer<br>Schuetzenhoehe 16<br>Dresden, 01099<br>GERMANY |
| 1158 | Ethikkommission bei der Saechsischen Landesaeztekammer<br>Schuetzenhoehe 16<br>Dresden, 01099<br>GERMANY |
| 1159 | Ethikkommission bei der Saechsischen Landesaeztekammer<br>Schuetzenhoehe 16<br>Dresden, 01099<br>GERMANY |
| 1170 | Ethikkommission bei der Saechsischen Landesaeztekammer<br>Schuetzenhoehe 16<br>Dresden, 01099<br>GERMANY |
| 1269 | Ethikkommission bei der Saechsischen Landesaeztekammer<br>Schuetzenhoehe 16<br>Dresden, 01099<br>GERMANY |



| <b><u>Study Site Number</u></b> | <b><u>Independent Ethics Committee or Institutional Review Board Address(es)</u></b>                     |
|---------------------------------|----------------------------------------------------------------------------------------------------------|
| 1311                            | Ethikkommission bei der Saechsischen Landesaeztekammer<br>Schuetzenhoehe 16<br>Dresden, 01099<br>GERMANY |
| 1421                            | Ethikkommission bei der Saechsischen Landesaeztekammer<br>Schuetzenhoehe 16<br>Dresden, 01099<br>GERMANY |
| 1422                            | Ethikkommission bei der Saechsischen Landesaeztekammer<br>Schuetzenhoehe 16<br>Dresden, 01099<br>GERMANY |
| 1424                            | Ethikkommission bei der Saechsischen Landesaeztekammer<br>Schuetzenhoehe 16<br>Dresden, 01099<br>GERMANY |
| 1425                            | Ethikkommission bei der Saechsischen Landesaeztekammer<br>Schuetzenhoehe 16<br>Dresden, 01099<br>GERMANY |
| 1443                            | Ethikkommission bei der Saechsischen Landesaeztekammer<br>Schuetzenhoehe 16<br>Dresden, 01099<br>GERMANY |
| 1444                            | Ethikkommission bei der Saechsischen Landesaeztekammer<br>Schuetzenhoehe 16<br>Dresden, 01099<br>GERMANY |

---

| <b><u>Study Site Number</u></b> | <b><u>Independent Ethics Committee or Institutional Review Board Address(es)</u></b>                     |
|---------------------------------|----------------------------------------------------------------------------------------------------------|
| 1523                            | Ethikkommission bei der Saechsischen Landesaeztekammer<br>Schuetzenhoehe 16<br>Dresden, 01099<br>GERMANY |
| 1525                            | Ethikkommission bei der Saechsischen Landesaeztekammer<br>Schuetzenhoehe 16<br>Dresden, 01099<br>GERMANY |
| 1526                            | Ethikkommission bei der Saechsischen Landesaeztekammer<br>Schuetzenhoehe 16<br>Dresden, 01099<br>GERMANY |
| 1530                            | Ethikkommission bei der Saechsischen Landesaeztekammer<br>Schuetzenhoehe 16<br>Dresden, 1099<br>GERMANY  |

GREECE

**Study Site Number**    **Independent Ethics Committee or Institutional Review Board Address(es)**

1139                      National Ethics Committee  
284 Mesogion Avenue  
Athens, HOLARGOS 15562  
GREECE

1673                      National Ethics Committee  
284 Mesogion Avenue  
Cholargos, ATHENS 15562  
GREECE

090177e18c5470f7\Approved\Approved On: 05-Oct-2017 23:40 (GMT)

**HUNGARY****Study Site Number** **Independent Ethics Committee or Institutional Review Board Address(es)**

|      |                                                                                                                           |
|------|---------------------------------------------------------------------------------------------------------------------------|
| 1142 | Egeszsegugyi Tudomanyos Tanacs Klinikai Farmakologiai Etikai Bizottsaga<br>Arany J. u. 6-8<br>Budapest, H-1051<br>HUNGARY |
| 1616 | Egeszsegugyi Tudomanyos Tanacs Klinikai Farmakologiai Etikai Bizottsaga<br>Arany J. u. 6-8<br>Budapest, 1051<br>HUNGARY   |
| 1618 | Egeszsegugyi Tudomanyos Tanacs Klinikai Farmakologiai Etikai Bizottsaga<br>Arany J. u. 6-8<br>Budapest, 1051<br>HUNGARY   |
| 1632 | Egeszsegugyi Tudomanyos Tanacs Klinikai Farmakologiai Etikai Bizottsaga<br>Arany J.u. 6-8<br>Budapest, H-1051<br>HUNGARY  |
| 1659 | Egeszsegugyi Tudomanyos Tanacs Klinikai Farmakologiai Etikai Bizottsaga<br>Arany J. u. 6-8<br>Budapest, H1051<br>HUNGARY  |

## INDIA

**Study Site Number** **Independent Ethics Committee or Institutional Review Board Address(es)**

|      |                                                                                                                                                                                                                  |
|------|------------------------------------------------------------------------------------------------------------------------------------------------------------------------------------------------------------------|
| 1376 | Institutional Ethical Committee<br>St. John's National Academy of Health Science, Sarjapur Road, Koramangala<br>Bangalore, KARNATAKA 560034<br>INDIA                                                             |
| 1378 | Institutional Ethics Committee<br>Chanre Rheumatology & Immunology Centre & Research<br>#149, 15th Main, NHCL, Water Tank Road, 4th Block, 3rd Stage, Basaveswaranagar,<br>Bangalore, KARNATAKA 560 003<br>INDIA |
| 1379 | Ethics Committee<br>Jehangir Clinical Development Centre Pvt. Ltd.<br>Jehangir Hospital Premises, 32 Sassoon Road<br>Pune, MAHARASHTRA 411001<br>INDIA                                                           |
| 1381 | KFRC Ethics Committee, KIMS Foundation and Research Centre<br>1-8-31/1, Minister Road<br>Secunderabad, TELANGANA 500003<br>INDIA                                                                                 |
| 1382 | CRD Ethics Committee<br>Centre For Rheumatic Diseases<br>11, Hermes Elegance, 1988, Convent Street Camp<br>Pune, MAHARASHTRA 411 001<br>INDIA                                                                    |
| 1384 | Ethics Committee Shalby Hospitals<br>Shalby Hospitals , Opp. Karnavati Club, S.G Highway<br>Ahmedabad, GUJARAT 380 015<br>INDIA                                                                                  |

---

| <b><u>Study Site Number</u></b> | <b><u>Independent Ethics Committee or Institutional Review Board Address(es)</u></b>                                                                         |
|---------------------------------|--------------------------------------------------------------------------------------------------------------------------------------------------------------|
| 1385                            | Manipal University Ethics Cimmittee<br>Madhav Nagar<br>Manipal, KARNATAKA 576 104<br>INDIA                                                                   |
| 1388                            | Institutional Ethics Committee for Biomedical Research<br>Bhagwan Mahavir Medical Research Centre<br>Hyderabad, ANDHRA PRADESH 500 004<br>INDIA              |
| 1439                            | CLINICOM<br>Committee for Evaluation of Protocols for Clinical Research<br>Bhooma No. 7, 17 A Cross, Malleswaram West<br>Bangalore, 560 055<br>INDIA         |
| 1653                            | Ethics Committee of Care Institute of Medical Sciences<br>CIMS Hospital, Nr. Shukan Mall, off. Science City Road<br>Sola, Ahmedabad, GUJARAT 380060<br>INDIA |

**IRELAND**

| <u>Study Site Number</u> | <u>Independent Ethics Committee or Institutional Review Board Address(es)</u>                    |
|--------------------------|--------------------------------------------------------------------------------------------------|
| 1553                     | Clinical Research Ethics Committee<br>6 Little Hanover Street, Lancaster Hall<br>Cork<br>IRELAND |

090177e18c5470f7\Approved\Approved On: 05-Oct-2017 23:40 (GMT)

## ITALY

| <u>Study Site Number</u> | <u>Independent Ethics Committee or Institutional Review Board Address(es)</u>                                                    |
|--------------------------|----------------------------------------------------------------------------------------------------------------------------------|
| 1058                     | Comitato di Bioetica I.R.C.C.S. Policlinico S.Matteo<br>V.le Golgi,19<br>pavia, 27100<br>ITALY                                   |
| 1059                     | Comitato Etico Area Vasta Centro<br>Azienda Ospedaliero-Universitaria Careggi<br>Largo Brambilla 3<br>Firenze, FI 50134<br>ITALY |
| 1162                     | Comitato Etico Azienda Ospedaliera Universitaria San Martino<br>Largo Rosanna Benzi 10<br>Genova, 16132<br>ITALY                 |



**KOREA, REPUBLIC OF****Study Site Number** **Independent Ethics Committee or Institutional Review Board Address(es)**

|      |                                                                                                                                                                                          |
|------|------------------------------------------------------------------------------------------------------------------------------------------------------------------------------------------|
| 1136 | Seoul National University Hospital Institutional Review Board<br>Seoul National University Hospital , 101 Daehak-Ro, Jongno-gu,<br>Seoul, 03080<br>KOREA, REPUBLIC OF                    |
| 1137 | IRB of Hanyang University Hospital<br>222-1, Wangsimni-ro, Seongdong-gu<br>Seoul, 04763<br>KOREA, REPUBLIC OF                                                                            |
| 1232 | Institution Review Board of Yonsei University Health System<br>Yonsei University College of Medicine, Severance Hospital, 50-1, Yonsei-ro<br>Seoul, 03722<br>KOREA, REPUBLIC OF          |
| 1233 | IRB of Inha University Hospital<br>Inha University Hospital , Inhang-ro 27, Jung-gu<br>Incheon, 22332<br>KOREA, REPUBLIC OF                                                              |
| 1234 | Independent Review Board of The Catholic University of Korea, Seoul St. Mary's Hospital<br>Seoul St. Mary's Hospital, 222 Banpo-daero, Seocho-gu<br>Seoul, 137-701<br>KOREA, REPUBLIC OF |
| 1235 | IRB of Asan Medical Center<br>Asan Medical Center<br>88, Olympic-ro 43-gil, Songpa-gu<br>Seoul, 05505<br>KOREA, REPUBLIC OF                                                              |
| 1236 | IRB of Samsung Medical Center<br>Institutional Review Board , 50 Ilwon-Dong, Gangnam-Gu<br>Seoul, 135-710<br>KOREA, REPUBLIC OF                                                          |

| <b><u>Study Site Number</u></b> | <b><u>Independent Ethics Committee or Institutional Review Board Address(es)</u></b>                                                                                    |
|---------------------------------|-------------------------------------------------------------------------------------------------------------------------------------------------------------------------|
| 1237                            | IRB of Eulji University Hospital<br>Eulji University Hospital, 95, Dunsanse-ro, Seo-gu<br>Daejeon, 35233<br>KOREA, REPUBLIC OF                                          |
| 1265                            | IRB of Chonnam National University Hospital<br>Chonnam National University Hospital, 42 Jebong-ro, Dong-gu<br>Gwangju, 61469<br>KOREA, REPUBLIC OF                      |
| 1511                            | IRB of Gangnam Severance Hospital<br>Gangnam Severance Hospital, 211 Eonjuro, Gangnam-gu<br>Seoul, 06273<br>KOREA, REPUBLIC OF                                          |
| 1512                            | IRB of Daegu Catholic University Medical Center<br>Daegu Catholic University Medical Center<br>33, Duryugongwon-ro 17-gil, Nam-gu<br>Daegu, 42472<br>KOREA, REPUBLIC OF |
| 1513                            | Institution Review Board, Dong-A University Hospital<br>26 Daesingongwon-ro, Seo-gu<br>Busan, 49201<br>KOREA, REPUBLIC OF                                               |
| 1568                            | Institution Review Board, Konkuk University Medical Center<br>120-1, Neungdong-ro, Gwangjin-gu<br>Seoul, 05030<br>KOREA, REPUBLIC OF                                    |

## MALAYSIA

**Study Site Number** **Independent Ethics Committee or Institutional Review Board Address(es)**

|      |                                                                                                                                                               |
|------|---------------------------------------------------------------------------------------------------------------------------------------------------------------|
| 1285 | Medical Research & Ethics Committee<br>Institute for Health Management, Jalan Rumah Sakit<br>Bangsar, Kuala Lumpur, 59000<br>MALAYSIA                         |
| 1286 | Medical Research & Ethics Committee<br>Institute for Health Management, Jalan Rumah Sakit<br>Bangsar, Kuala Lumpur, 59000<br>MALAYSIA                         |
| 1287 | Independent Ethics Committee Ramsay Sime Darby Health Care<br>Subang Jaya Medical Centre<br>No. 1, Jalan SS 12/1A,<br>Subang Jaya, SELANGOR 47500<br>MALAYSIA |
| 1288 | Medical Research & Ethics Committee<br>Institute for Health Management, Jalan Rumah Sakit<br>Bangsar, Kuala Lumpur, 59000<br>MALAYSIA                         |
| 1307 | Medical Research & Ethics Committee<br>Institute for Health Management, Jalan Rumah Sakit<br>Bangsar, Kuala Lumpur, 59000<br>MALAYSIA                         |
| 1308 | Medical Research & Ethics Committee<br>Institute for Health Management, Jalan Rumah Sakit<br>Bangsar, Kuala Lumpur, 59000<br>MALAYSIA                         |
| 1309 | Medical Research & Ethics Committee<br>Institute for Health Management, Jalan Rumah Sakit<br>Bangsar, Kuala Lumpur, 59000<br>MALAYSIA                         |

## MEXICO

| <u>Study Site Number</u> | <u>Independent Ethics Committee or Institutional Review Board Address(es)</u>                                                                                                                                                  |
|--------------------------|--------------------------------------------------------------------------------------------------------------------------------------------------------------------------------------------------------------------------------|
| 1055                     | Instituto Nacional de Ciencias Medicas y Nutricion Salvador Zubiran Comite Institucional de Investigacion Biomedica en Humanos<br>Av VASCO DE QUIROGA #15, COL Belisario Dominguez SECCION XVI<br>Mexico City, 14080<br>MEXICO |
| 1056                     | Comisión de Investigación Hospital General de México Dr. Balmis<br>No. 148, Col. Doctores<br>México, D.F. 06726<br>MEXICO                                                                                                      |
| 1057                     | Comite de Etica en la Investigacion Clinica<br>Virrey de Mendoza 2000 Felix Ireta<br>Morelia, Michoacan, 58070, MEXICO                                                                                                         |
| 1181                     | Comite de Etica en Investigacion de Clinica Borda, S.A de C.V.<br>Av. Alvaro Obregon No. 107, Col. Centro<br>Cuernavaca, MORELOS 62000<br>MEXICO                                                                               |
| 1183                     | Comite de Investigacion de la Clinica Bajio CLINBA S.C.<br>Valenciana #7 Col. Paxtitlan<br>Guanajuato, 36090<br>MEXICO                                                                                                         |
| 1188                     | Comité Bioetico para la Investigacion Clinica S.C.<br>Puebla 422, Despacho 4, Col. Roma Sur<br>Mexico, DISTRITO FEDERAL 06700<br>MEXICO                                                                                        |
| 1572                     | Comité de Ética e Investigación del Hospital Christus Muguerza del Parque<br>Calle Dr. Pedro Leal Rodriguez y de la Llave<br>Chihuahua, CHIHUAHUA 31000<br>MEXICO                                                              |

| <b><u>Study Site Number</u></b> | <b><u>Independent Ethics Committee or Institutional Review Board Address(es)</u></b>                                                                                                                                                    |
|---------------------------------|-----------------------------------------------------------------------------------------------------------------------------------------------------------------------------------------------------------------------------------------|
| 1573                            | Comite de Etica en Investigaci3n de la Facultad de Medicina y Hospital Universitario de la Universidad Autonoma de Nuevo Leon<br>Av. Francisco I Madero Pte s/n y Gonzalitos Col Mitras Centro<br>Monterrey, NUEVO LEON 64460<br>MEXICO |
| 1574                            | Comite de Bioetica de la Unidad de Investigacion en Enfermedades Cronico Degenerativas<br>Colomos 2292, Col. Providencia<br>Guadalajara, JALISCO 44620<br>MEXICO                                                                        |
| 1575                            | Comite de Etica en Investigacion de la Clinica Bajio Clinba, S.C.<br>Valenciana 7, Colonia Paxtitlan<br>Guanajuato, GUANAJUATO 36090<br>MEXICO                                                                                          |
| 1623                            | Comision de Etica e Investigacion CECYPE<br>Fray Bernardino de Sahagun 101, Fraccionamiento Mirador del Punhuato<br>Morelia, MICHOACAN 58249<br>MEXICO                                                                                  |
| 1625                            | Comite de Bioetica de la Facultad de Medicina UA de C<br>Morelos 900 Oriente<br>Colonia Centro<br>Torreon, COAHUILA 27000<br>MEXICO                                                                                                     |
| 1626                            | Comite de Etica en Investigaci3n Grupo Calyde, SCP<br>Calle 23 Diagonal No. 523 entre 11 A1 y 7, Col. Residencial Pensiones<br>M3rida, YUCAT3N 97217<br>MEXICO                                                                          |
| 1627                            | Comite de Etica en Investigacion Hospital Central Dr. Ignacio Morones Prieto<br>Avenida Venustiano Carranza 2395, Zona Universitaria<br>San Luis Potosi, SAN LUIS POTOSI 78240<br>MEXICO                                                |

| <b><u>Study Site Number</u></b> | <b><u>Independent Ethics Committee or Institutional Review Board Address(es)</u></b>                                                                                                                                                                       |
|---------------------------------|------------------------------------------------------------------------------------------------------------------------------------------------------------------------------------------------------------------------------------------------------------|
| 1628                            | Comisión de Investigación<br>Camino a Santa Teresa 1055, Col. Heroes de Padierna<br>Mexico, D.F 10700<br>MEXICO<br><br>Comisión de Etica en Materia de Investigación<br>Col. Heroes de Padierna, Camino a Santa Teresa 1055<br>Mexico, D.F 10700<br>MEXICO |
| 1629                            | Mexico Centre for Clinical Research S.A. de C.V.<br>Amores No. 709, Col. Del Valle, Del. Benito Juarez<br>Distrito Federal, MEXICO, 03100                                                                                                                  |
| 1642                            | Instituto Jalisciense de Investigacion Clinica S.A. de C.V.<br>Penitenciaria No. 20 Col Centro<br>Guadalajara, JALISCO 44100<br>MEXICO                                                                                                                     |
| 1654                            | Comite Bioetico para la Investigacion Clinica S.C.<br>Puebla 422 Despacho, 4 Col. Roma Sur<br>Distrito Federal, 06700<br>MEXICO                                                                                                                            |
| 1655                            | Comite Bioetico para la Investigacion Clinica S. C.<br>Puebla 422-4, Col Roma Sur, Del Cuahutemoc<br>Mexico City, MEXICO CITY 46214<br>MEXICO                                                                                                              |

**NEW ZEALAND****Study Site Number** **Independent Ethics Committee or Institutional Review Board Address(es)**

|      |                                                                                                                                                                |
|------|----------------------------------------------------------------------------------------------------------------------------------------------------------------|
| 1593 | Southern Health Disability Ethics Committee<br>Ministry of Health, Ethics Department, Freyburg Building<br>20 Aitken Street<br>Wellington, 6011<br>NEW ZEALAND |
| 1594 | Southern Health Disability Ethics Committee<br>Ministry of Health, Ethics Department, Freyburg Building<br>20 Aitken Street<br>Wellington, 6011<br>NEW ZEALAND |
| 1596 | Southern Health Disability Ethics Committee<br>Ministry of Health, Ethics Department, Freyburg Building<br>20 Aitken Street<br>Wellington, 6011<br>NEW ZEALAND |

## PERU

| <u>Study Site Number</u> | <u>Independent Ethics Committee or Institutional Review Board Address(es)</u>                                                                                      |
|--------------------------|--------------------------------------------------------------------------------------------------------------------------------------------------------------------|
| 1416                     | Comite Institucional de Etica de la Universidad Peruana Cayetano Heredia<br>Av. Honorio Delgado 430, Urb. Ingenieria<br>San Martin de Porres, LIMA Lima 31<br>PERU |
| 1417                     | Comite De Bioetica De La Red Asistencial Sabogal - Essalud<br>Jr. Colina 1081<br>Bellavista, CALLAO Callao 02<br>PERU                                              |
| 1529                     | Comite Institucional de Etica de la Universidad Peruana Cayetano Heredia<br>Av. Honorio Delgado 430, Urb. Ingenieria<br>San Martin de Porres, LIMA Lima 31<br>PERU |



## PHILIPPINES

| <u>Study Site Number</u> | <u>Independent Ethics Committee or Institutional Review Board Address(es)</u>                                                                                                                  |
|--------------------------|------------------------------------------------------------------------------------------------------------------------------------------------------------------------------------------------|
| 1408                     | INSTITUTIONAL REVIEW BOARD<br>Clinical Division Building<br>University of Santo Tomas Hospital, 3rd Floor<br>España, MANILA 1008<br>PHILIPPINES                                                |
| 1409                     | Institutional Ethics Review Board<br>University of Perpetual Help System Dalta<br>7th Floor, Medical Arts Building<br>Alabang - Zapote Road<br>Las Piñas City, PHILIPPINES 1742<br>PHILIPPINES |
| 1410                     | DLS Institutional Review Board<br>Room 60301, De La Salle Angelo King Medical Research Center Congressional Avenue<br>Congressional Avenue<br>Dasmariñas CAVITE 4114<br>PHILIPPINES            |
| 1411                     | Cluster Ethics Review Committee<br>Hospital Research Office, Family Medicine Complex<br>Southern Philippines Medical Center, Bajada<br>Davao, DAVAO 8000<br>PHILIPPINES                        |
| 1412                     | Institutional Review Board<br>Mary Mediatrix Medical Center<br>JP Laurel Highway<br>Lipa City, BATANGAS<br>PHILIPPINES                                                                         |
| 1413                     | Angeles University Foundation Institutional Ethics Review Committee<br>College of Medicine, 3/F San Agustin Building, McArthur Highway<br>Angeles City, PAMPANGA 2009<br>PHILIPPINES           |

**Study Site Number**    **Independent Ethics Committee or Institutional Review Board Address(es)**

1414                    Institutional Review Board  
Chong Hua Medical Arts Center  
Chong Hua Hospital, J. Lorente Ext.  
Cebu City, 6000  
PHILIPPINES

1666                    Institutional Ethics Review Committee  
5/F Training and Research Service  
Jose R. Reyes Memorial Medical Center, Rizal Ave. Sta. Cruz Manila  
Philippines, 1003  
PHILIPPINES

090177e18c5470f7\Approved\Approved On: 05-Oct-2017 23:40 (GMT)

## POLAND

| <u>Study Site Number</u> | <u>Independent Ethics Committee or Institutional Review Board Address(es)</u>                           |
|--------------------------|---------------------------------------------------------------------------------------------------------|
| 1060                     | Komisja Bioetyczna przy Okregowej Izbie Lekarskiej<br>ul. Swietojanska 7<br>Bialystok, 15-082<br>POLAND |
| 1061                     | Komisja Bioetyczna przy Okregowej Izbie Lekarskiej<br>ul. Swietojanska 7<br>Bialystok, 15-082<br>POLAND |
| 1062                     | Komisja Bioetyczna przy Okregowej Izbie Lekarskiej<br>ul. Swietojanska 7<br>Bialystok, 15-082<br>POLAND |
| 1063                     | Komisja Bioetyczna przy Okregowej Izbie Lekarskiej<br>ul. Swietojanska 7<br>Bialystok, 15-082<br>POLAND |
| 1064                     | Komisja Bioetyczna przy Okregowej Izbie Lekarskiej<br>ul. Swietojanska 7<br>Bialystok, 15-082<br>POLAND |
| 1160                     | Komisja Bioetyczna przy Okregowej Izbie Lekarskiej<br>ul. Swietojanska 7<br>Bialystok, 15-082<br>POLAND |
| 1161                     | Komisja Bioetyczna przy Okregowej Izbie Lekarskiej<br>ul. Swietojanska 7<br>Bialystok, 15-082<br>POLAND |

| <b><u>Study Site Number</u></b> | <b><u>Independent Ethics Committee or Institutional Review Board Address(es)</u></b>                    |
|---------------------------------|---------------------------------------------------------------------------------------------------------|
| 1349                            | Komisja Bioetyczna przy Okregowej Izbie Lekarskiej<br>ul. Swietojanska 7<br>Bialystok, 15-082<br>POLAND |
| 1429                            | Komisja Bioetyczna przy Okregowej Izbie Lekarskiej<br>Swietojanska 7<br>Bialystok, 15-082<br>POLAND     |
| 1445                            | Komisja Bioetyczna przy Okregowej Izbie Lekarskiej<br>ul. Swietojanska 7<br>Bialystok, 15-082<br>POLAND |
| 1446                            | Komisja Bioetyczna przy Okregowej Izbie Lekarskiej<br>ul. Swietojanska 7<br>Bialystok, 15-082<br>POLAND |
| 1508                            | Komisja Bioetyczna przy Okregowej Izbie Lekarskiej<br>ul. Swietojanska 7<br>Bialystok, 15-082<br>POLAND |

**PUERTO RICO**

| <b><u>Study Site Number</u></b> | <b><u>Independent Ethics Committee or Institutional Review Board Address(es)</u></b> |
|---------------------------------|--------------------------------------------------------------------------------------|
| 1202                            | Quorum Review IRB<br>1501 Fourth Ave, Ste 800<br>Seattle, WA 98101<br>UNITED STATES  |
| 1496                            | Quorum Review IRB<br>1601 Fifth St, Ste 1000<br>Seattle, WA 98101<br>UNITED STATES   |
| 1551                            | Quorum Review IRB<br>1501 Fourth Ave, Ste 800<br>Seattle, WA 98101<br>UNITED STATES  |

090177e18c5470f7\Approved\Approved On: 05-Oct-2017 23:40 (GMT)

## ROMANIA

**Study Site Number** **Independent Ethics Committee or Institutional Review Board Address(es)**

1154 Comisia Nationala de Bioetica a Medicamentului si a Dispozitivelor Medicale  
Sos. Stefan cel Mare, nr. 19-21, sector 2  
Bucharest, BUCHAREST 020125  
ROMANIA

1156 Comisia Nationala de Bioetica a Medicamentului si a Dispozitivelor Medicale  
Sos. Stefan cel Mare, nr. 19-21, sector 2  
Bucharest, BUCHAREST 020125  
ROMANIA

**RUSSIAN FEDERATION**

| <b><u>Study Site Number</u></b> | <b><u>Independent Ethics Committee or Institutional Review Board Address(es)</u></b>                                                                                                                                                                                                                                                      |
|---------------------------------|-------------------------------------------------------------------------------------------------------------------------------------------------------------------------------------------------------------------------------------------------------------------------------------------------------------------------------------------|
| 1430                            | Independent Ethics Committee of State Educational Institution of High Professional Education Smolensk State Medical University<br>28 ulitsa Krupskoy, 27 prospect Gagarina<br>Smolensk, 214019<br>RUSSIAN FEDERATION                                                                                                                      |
| 1432                            | Ethics Committee at the Republican Hospital n.a. V.A. Baranov<br>Pirogova str., 3<br>St. Petersburg, 185019<br>RUSSIAN FEDERATION<br><br>Ethics Council at the Ministry of Healthcare and Social Development of Russian Federation<br>3, Rakhmanovskij per.<br>Moscow, 127994, RUSSIAN FEDERATION                                         |
| 1434                            | Local EC at the City Clinical Hospital #4<br>building 13, 25 Pavlovskaya ulitsa<br>Moscow, 115093<br>RUSSIAN FEDERATION                                                                                                                                                                                                                   |
| 1609                            | Local Ethics Committee at the Clinical Hospital #122 named after L.G. Sokolov of the Federal Medical-Biological Agency<br>4 Kultury prospect<br>Saint-Petersburg, 194291<br>RUSSIAN FEDERATION<br><br>Ethics Council at the Ministry of Healthcare of Russian Federation<br>3, Rakhmanovskiy per.<br>Moscow, 127994<br>RUSSIAN FEDERATION |
| 1610                            | Local Ethics Committee at the Saint -Petersburg State Budgetary Healthcare Institution "Clinical Rheumatology Hospital # 25"<br>30 Bolshaya Podyatcheskaya Ulitsa<br>Saint Petersburg, 190068<br>RUSSIAN FEDERATION                                                                                                                       |

| <b><u>Study Site Number</u></b> | <b><u>Independent Ethics Committee or Institutional Review Board Address(es)</u></b>                                                                                                                                                                                                                                                                                  |
|---------------------------------|-----------------------------------------------------------------------------------------------------------------------------------------------------------------------------------------------------------------------------------------------------------------------------------------------------------------------------------------------------------------------|
|                                 | Ethics Council at the Ministry of Healthcare of Russian Federation<br>30 Bolshaya Podyatcheskaya Ulitsa<br>Saint Petersburg, 127994<br>RUSSIAN FEDERATION                                                                                                                                                                                                             |
| 1611                            | Local Ethics Committee at the St. Petersburg State Institution of Healthcare Consultative-diagnostic Center #85<br>89/3 Prospect Veteranov<br>St. Petersburg, 198260<br>RUSSIAN FEDERATION                                                                                                                                                                            |
| 1612                            | Ethics Council at the Ministry of Healthcare and Social Development of Russian Federation<br>Department of State Regulation of Medicines Circulation<br>3, Rakhmanovskij per.,<br>Moscow, N/A 127994<br>RUSSIAN FEDERATION<br><br>IRB of St Petersburg SHI City Hospital # 40<br>Lit. B,9 Borisova ulitsa, Sestroretsk<br>St.Petersburg, 197706<br>RUSSIAN FEDERATION |
| 1613                            | Ethics Council at the Ministry of Healthcare of Russian Federation<br>3, Rakhmanovskij per.<br>Moscow, 127994<br>RUSSIAN FEDERATION<br><br>Local Ethics Committee at the Federal North-West Medical Research Centre<br>15 Prospect Parkhomenko<br>Saint Petersburg, 194156<br>RUSSIAN FEDERATION                                                                      |
| 1646                            | Local Ethics Committee of State Budgetary Healthcare Institution "Regional Clinical Hospital"<br>Build. 1, Lyapidevskogo Street<br>Barnaul, 656024<br>RUSSIAN FEDERATION                                                                                                                                                                                              |



| <b><u>Study Site Number</u></b> | <b><u>Independent Ethics Committee or Institutional Review Board Address(es)</u></b>                                                                                                                                                                                                                                                                      |
|---------------------------------|-----------------------------------------------------------------------------------------------------------------------------------------------------------------------------------------------------------------------------------------------------------------------------------------------------------------------------------------------------------|
| 1647                            | Local Ethics Committee of Regional State Budgetary Healthcare Institution of "Tomsk Regional Clinical Hospital"<br>96, Ivana Chernykh str.<br>Tomsk, 634063<br>RUSSIAN FEDERATION                                                                                                                                                                         |
| 1648                            | Local Ethics Committee of State Healthcare Institution Regional Clinical Hospital for War Veterans<br>50 let Oktaybrya str., 10<br>Kemerovo, 650099<br>RUSSIAN FEDERATION                                                                                                                                                                                 |
| 1649                            | Local Ethics Committee at Consultative Diagnostic Rheumatology Center "Healthy Joints", LLC<br>build.30, Ordzhonikidze street<br>Novosibirsk city, NOVOSIBIRSK REGION 630091<br>RUSSIAN FEDERATION                                                                                                                                                        |
| 1650                            | Ethics Council at the Ministry of Healthcare and Social Development of Russian Federation<br>Department of State Regulation of Medicines Circulation<br>3 Rakhmanovskij per<br>Moscow, 12799<br>RUSSIAN FEDERATION<br><br>Local Ethic Committee "Ural State Medical Academy of Roszdrav"<br>3 Repina Street<br>Ekaterinburg, 620028<br>RUSSIAN FEDERATION |
| 1651                            | Local Ethics Committee of State Healthcare Institution "Sverdlovsk Regional Clinical Hospital No. 1"<br>185, Volgogradskaya str.<br>Ekaterinburg, 620102<br>RUSSIAN FEDERATION                                                                                                                                                                            |
| 1663                            | Local Ethics Committee of Rheumatology Institute of Russian Academy of Medical Sciences<br>Build. 34 A Kashirskoe shosse<br>Moscow, 115522<br>RUSSIAN FEDERATION                                                                                                                                                                                          |

## SLOVAKIA

**Study Site Number** **Independent Ethics Committee or Institutional Review Board Address(es)**

|      |                                                                                                                                                                                                                                                                   |
|------|-------------------------------------------------------------------------------------------------------------------------------------------------------------------------------------------------------------------------------------------------------------------|
| 1072 | Eticka komisia Narodny ustav reumatickych chorob<br>Nabrezie Ivana Krasku 4<br>Piestany, 92112<br>SLOVAKIA                                                                                                                                                        |
| 1073 | Eticka Komisia, Fakultna nemocnica L.Pasteura<br>Rastislavova 43<br>Kosice, 040 00<br>SLOVAKIA<br><br>Eticka komisia pri Narodnom ustave<br>Reumatickych chorob<br>Ul. I. Krasku 4<br>Piestany, 921 01<br>SLOVAKIA                                                |
| 1075 | Eticka komisia Narodny ustav reumatickych chorob<br>Nabrezie Ivana Krasku 4<br>Piestany, 92112<br>SLOVAKIA                                                                                                                                                        |
| 1076 | Eticka komisia pri Narodnom ustave reumatickych chorob<br>Ul. I. Krasku 4<br>Piestany, 92101<br>SLOVAKIA<br><br>Eticka komisia pri Presovskom samospravnom kraji<br>Presovsky samospravny kraj, odbor zdravotnictva<br>Nam. Mieru 2<br>Presov, 080 01<br>SLOVAKIA |

**Study Site Number** **Independent Ethics Committee or Institutional Review Board Address(es)**

|      |                                                                                                                                                                                                                                           |
|------|-------------------------------------------------------------------------------------------------------------------------------------------------------------------------------------------------------------------------------------------|
| 1077 | Eticka komisia Novapharm, s.r.o.<br>Zeleznicna nemocnica a poliklinika<br>Sancova 110<br>Bratislava 3, 832 99<br>SLOVAKIA<br><br>Eticka komisia pri Narodnom ustave reumatickych chorob<br>Ul. I. Krasku 4<br>Piestany, 92101<br>SLOVAKIA |
| 1338 | Eticka komisia Narodny ustav reumatickych chorob<br>Nabrezie Ivana Krasku 4<br>Piestany, 92112<br>SLOVAKIA<br><br>Eticka komisia Urad Nitrianskeho samospravneho kraja<br>Razusova 2A<br>Nitra, 94901<br>SLOVAKIA                         |
| 1339 | Eticka komisia Narodny ustav reumatickych chorob<br>Nabrezie Ivana Krasku 4<br>Piestany, 92112<br>SLOVAKIA<br><br>Eticka komisia Urad Trnavskeho samospravneho kraja<br>Starohajska 10<br>Trnava, 91701<br>SLOVAKIA                       |
| 1340 | Eticka komisia Trencianskeho samospravneho kraja<br>Hviezdoslavova 1<br>Trencin, 911 50<br>SLOVAKIA                                                                                                                                       |

**Study Site Number** **Independent Ethics Committee or Institutional Review Board Address(es)**

|      |                                                                                                                                                                                                                                     |
|------|-------------------------------------------------------------------------------------------------------------------------------------------------------------------------------------------------------------------------------------|
|      | Eticka komisia Narodny ustav reumatickych chorob<br>Nabrezie Ivana Krasku 4<br>Piestany, 92101<br>SLOVAKIA                                                                                                                          |
| 1341 | Eticka komisia Narodny ustav reumatickych chorob<br>Ul. I. Krasku 4<br>Piestany, 92101<br>SLOVAKIA<br><br>Eticka komisia, Urad Kosickeho samospravneho kraja<br>Namestie Maratonu mieru 1<br>Kosice, KOSICKY KRAJ 04266<br>SLOVAKIA |
| 1342 | Eticka Komisia Urad Bratislavskeho samospravneho kraja<br>Sabinovska 16<br>Bratislava, 820 05<br>SLOVAKIA<br><br>Eticka komisia Narodny ustav reumatickych chorob<br>Ul. I. Krasku 4<br>Piestany, 92112<br>SLOVAKIA                 |
| 1343 | Eticka komisia Narodny ustav reumatickych chorob<br>Nabrezie I. Krasku 4<br>Piestany, 92101<br>SLOVAKIA<br><br>Eticka komisia Presovskeho samospravneho kraja<br>Namestie mieru 2<br>Presov, 080 01<br>SLOVAKIA                     |

**Study Site Number** **Independent Ethics Committee or Institutional Review Board Address(es)**

1344 Nezavisla eticka komisia Banskobystrickeho samospravneho kraja  
Namestie SNP 23  
Banska Bystrica, 974 01  
SLOVAKIA

Eticka komisia Narodny ustav reumatickych chorob  
Nabrezie Ivana Krasku 4  
Piestany, 92112  
SLOVAKIA

1345 Eticka komisia Narodny ustav reumatickych chorob  
Nabrezie I. Krasku 4  
Piestany, 92101  
SLOVAKIA

Eticka komisia Trencianskeho samospravneho kraja  
Hviezdoslavova 1  
Trencin, 911 50  
SLOVAKIA

1346 Eticka komisia Urad Trnavskeho samospravneho kraja  
Starohajska 10  
Trnava, 917 01  
SLOVAKIA

Eticka komisia Narodny ustav reumatickych chorob  
Nabrezie Ivana Krasku 4  
Piestany, 92112  
SLOVAKIA

## SPAIN

**Study Site Number** **Independent Ethics Committee or Institutional Review Board Address(es)**

|      |                                                                                                                                                |
|------|------------------------------------------------------------------------------------------------------------------------------------------------|
| 1035 | Comite Autonomico de Ensayos Clinicos de Andalucia<br>CONSEJERIA DE SALUD, AVDA. INNOVACION S/N<br>EDIFICIO ARENA 1<br>SEVILLA, 41020<br>SPAIN |
| 1036 | CEI de los Hospitales Universitarios Virgen Macarena - Virgen del Rocio Sevilla<br>Avda. Manuel Siurot s/n,<br>Sevilla, 41013<br>SPAIN         |
| 1037 | Comite Autonomico de Ensayos Clinicos de Andalucia<br>CONSEJERIA DE SALUD, AVDA. INNOVACION S/N, EDIFICIO ARENA 1<br>SEVILLA, 41020<br>SPAIN   |
| 1038 | CEI de los Hospitales Universitarios Virgen Macare - Virgen del Rocio Sevilla<br>Avda. Manuel Siurot s/n<br>Sevilla, 41013<br>SPAIN            |
| 1039 | Comite Autonomico de Ensayos Clinicos de Andalucia<br>CONSEJERIA DE SALUD, AVDA. INNOVACION S/N, EDIFICIO ARENA 1<br>SEVILLA, 41020<br>SPAIN   |
| 1292 | CEI de los Hospitales Universitarios Virgen Macarena - Virgen del Rocio Sevilla<br>Avda. Manuel Siurot s/n<br>Sevilla, 41013<br>SPAIN          |
| 1293 | CEI de los Hospitales Universitarios Virgen Macarena - Virgen del Rocio Sevilla<br>Avda. Manuel Siurot s/n<br>Sevilla, 41013<br>SPAIN          |

| <b><u>Study Site Number</u></b> | <b><u>Independent Ethics Committee or Institutional Review Board Address(es)</u></b>                                                         |
|---------------------------------|----------------------------------------------------------------------------------------------------------------------------------------------|
| 1294                            | CEI de los Hospitales Universitarios Virgen Macarena - Virgen del Rocio Sevilla<br>Avda. Manuel Siurot s/n<br>Sevilla, 41013<br>SPAIN        |
| 1295                            | Comite Autonomico de Ensayos Clinicos de Andalucia<br>CONSEJERIA DE SALUD, AVDA. INNOVACION S/N, EDIFICIO ARENA 1<br>SEVILLA, 41020<br>SPAIN |
| 1296                            | Comite Autonomico de Ensayos Clinicos de Andalucia<br>CONSEJERIA DE SALUD, AVDA. INNOVACION S/N, EDIFICIO ARENA 1<br>SEVILLA, 41020<br>SPAIN |
| 1298                            | CEI de los Hospitales Universitarios Virgen Macarena - Virgen del Rocio Sevilla<br>Avda. Manuel Siurot s/n<br>Sevilla, 41013<br>SPAIN        |
| 1299                            | CEI de los Hospitales Universitarios Virgen Macarena - Virgen del Rocio Sevilla<br>Avda. Manuel Siurot s/n<br>Sevilla, 41013<br>SPAIN        |
| 1300                            | Comite Autonomico de Ensayos Clinicos de Andalucia<br>CONSEJERIA DE SALUD, AVDA. INNOVACION S/N, EDIFICIO ARENA 1<br>SEVILLA, 41020<br>SPAIN |
| 1301                            | CEI de los Hospitales Universitarios Virgen Macarena - Virgen del Rocio Sevilla<br>Avda. Manuel Siurot s/n<br>Sevilla, 41013<br>SPAIN        |

---

| <b><u>Study Site Number</u></b> | <b><u>Independent Ethics Committee or Institutional Review Board Address(es)</u></b>                                                         |
|---------------------------------|----------------------------------------------------------------------------------------------------------------------------------------------|
| 1303                            | Comite Autonomico de Ensayos Clinicos de Andalucia<br>CONSEJERIA DE SALUD, AVDA. INNOVACION S/N, EDIFICIO ARENA 1<br>SEVILLA, 41020<br>SPAIN |
| 1304                            | CEI de los Hospitales Universitarios Virgen Macarena - Virgen del Rocio Sevilla<br>Avda. Manuel Siurot s/n<br>Sevilla, 41013<br>SPAIN        |
| 1576                            | CEI de los Hospitales Universitarios Virgen Macarena - Virgen del Rocio Sevilla<br>Avda. Manuel Siurot s/n<br>Sevilla, 41013<br>SPAIN        |



## SWEDEN

**Study Site Number** **Independent Ethics Committee or Institutional Review Board Address(es)**

|      |                                                                                                                                                            |
|------|------------------------------------------------------------------------------------------------------------------------------------------------------------|
| 1078 | Regionala Etikprovningssamfundet i Linköping<br>c/o Hälsovetenskapliga fakulteten, Sandbacksgatan 7, Linköpings Universitet<br>Linköping, 581 83<br>SWEDEN |
| 1079 | Regionala Etikprovningssamfundet i Linköping<br>c/o Hälsovetenskapliga fakulteten, Sandbacksgatan 7, Linköpings Universitet<br>Linköping, 581 83<br>SWEDEN |
| 1313 | Regionala Etikprovningssamfundet i Linköping<br>c/o Hälsovetenskapliga fakulteten, Sandbacksgatan 7, Linköpings Universitet<br>Linköping, 581 83<br>SWEDEN |
| 1519 | Regionala Etikprovningssamfundet i Linköping<br>c/o Hälsovetenskapliga fakulteten, Sandbacksgatan 7, Linköpings Universitet<br>Linköping, 581 83<br>SWEDEN |
| 1607 | Regionala Etikprovningssamfundet i Linköping<br>c/o Hälsovetenskapliga fakulteten, Sandbacksgatan 7, Linköpings Universitet<br>Linköping, 581 83<br>SWEDEN |
| 1608 | Regionala Etikprovningssamfundet i Linköping<br>c/o Hälsovetenskapliga fakulteten, Sandbacksgatan 7, Linköpings Universitet<br>Linköping, 581 83<br>SWEDEN |

## TAIWAN

| <u>Study Site Number</u> | <u>Independent Ethics Committee or Institutional Review Board Address(es)</u>                                                                                   |
|--------------------------|-----------------------------------------------------------------------------------------------------------------------------------------------------------------|
| 1361                     | Chung-Ho Memorial Hospital, Kaohsiung Medical University Institutional Review Board<br>No. 100, Tzyou 1st Road<br>Kaohsiung, 807<br>TAIWAN                      |
| 1362                     | National Taiwan University Hospital, Research Ethics Committee<br>No.7 Chung-Shan South Road<br>Taipei, 100<br>TAIWAN                                           |
| 1363                     | Taipei Veterans General Hospital, Institutional Review Board<br>No. 201, Sec. 2, Shih-Pai Road<br>Taipei, 112<br>TAIWAN                                         |
| 1365                     | National Cheng Kung University Hospital, Institutional Review Board<br>No. 138, Sheng-Li Road<br>Tainan, 704<br>TAIWAN                                          |
| 1366                     | The Institutional Review Board of Taichung Veterans General Hospital<br>No. 160, Section. 3, Taichung Port Road, Situn District<br>Taichung City, 407<br>TAIWAN |
| 1514                     | Chang Gung Medical Foundation, Institutional Review Board<br>199 Tung Hwa North Road<br>Taipei, 10507<br>TAIWAN                                                 |
| 1515                     | Chang Gung Medical Foundation, Institutional Review Board<br>No. 199 Tung Hwa North Road<br>Taipei, 10507<br>TAIWAN                                             |

**Study Site Number**    **Independent Ethics Committee or Institutional Review Board Address(es)**

|      |                                                                                                                        |
|------|------------------------------------------------------------------------------------------------------------------------|
| 1517 | Changhua Christian Hospital, Institutional Review<br>135 Nanhsiao Street, Changhua<br>Changhua, 500<br>TAIWAN          |
| 1518 | Kaohsiung Veterans General Hospital, Institutional Review Board<br>386 Ta-Chung First Road<br>Kaohsiung, 813<br>TAIWAN |

090177e18c5470f7\Approved\Approved On: 05-Oct-2017 23:40 (GMT)

## THAILAND

**Study Site Number** **Independent Ethics Committee or Institutional Review Board Address(es)**

1453 Research Ethics Committee 1, Faculty of Medicine, Chiang Mai Hospital  
110 Intavaroros Rd.  
Amphoe Mueang, CHIANG MAI 50200  
THAILAND

1454 Ministry of Public Health, Public Health Academic Office  
Tiwanon Road, Amphoe Muang  
Nonthaburi, 11000  
THAILAND

Ethics Committees on Research Involving Human Subjects  
Rajavithi Hospital, Bangkok, Thailand  
2 Rajavithi Road, Rajavithi Hospital  
Bangkok, 10400  
THAILAND

1455 The Khon Kaen University Ethics Committee For Human Research  
Faculty of Medicine, Srinagarind Hospital  
Khonkaen University, 123 Mitraphab Road  
Muang, KHONKAEN 40002  
THAILAND

1456 Institutional Review Board, Royal Thai Army Medical Department  
317 Rajavithi Road, Rajathevee  
Bangkok, 10400  
THAILAND

1624 Siriraj Institutional Review Board  
2 Wanglang Road, Bangkoknoi  
Bangkok, 10700  
THAILAND

**TURKEY**

| <b><u>Study Site Number</u></b> | <b><u>Independent Ethics Committee or Institutional Review Board Address(es)</u></b>                                                                                    |
|---------------------------------|-------------------------------------------------------------------------------------------------------------------------------------------------------------------------|
| 1051                            | Istanbul University Cerrahpasa Medical Faculty Ethics Committee<br>Kocamustafapasa<br>Istanbul, 34098<br>TURKEY                                                         |
| 1052                            | Dokuz Eylul Universitesi Tip Fakultesi Klinik Arastirmalar Etik Kurulu<br>Dokuz Eylul Universitesi Tip Fakultesi, Yeni Dekanlik Binasi Kat: 2<br>Izmir, 35340<br>TURKEY |
| 1053                            | Ege University Medical Faculty Ethics Committee<br>Bornova, 35100<br>TURKEY                                                                                             |
| 1054                            | Hacettepe University Medical Faculty Ethics Committee<br>Sihhiya<br>Ankara, 06100<br>TURKEY                                                                             |

## UKRAINE

| <b><u>Study Site Number</u></b> | <b><u>Independent Ethics Committee or Institutional Review Board Address(es)</u></b>                                                                                                             |
|---------------------------------|--------------------------------------------------------------------------------------------------------------------------------------------------------------------------------------------------|
| 1163                            | Committee for Ethics Issues of ME of Health Care "Kharkiv City Clinical Hospital #8"<br>266g, Saltivske Shosse<br>Kharkiv, 61178<br>UKRAINE                                                      |
| 1164                            | Committee for Ethics Issues of Municipal Establishment City Hospital #7<br>9 Privokzalna Street<br>Zaporizhzhia, 69118<br>UKRAINE                                                                |
| 1165                            | Committee for Ethics Issues of Municipal City Clinical Hospital #4<br>3 Svetsitskogo Str<br>Lviv, 79011<br>UKRAINE                                                                               |
| 1166                            | Committee for Ethics Issues of Vinnitsa Regional Clinical Hospital n.a. Pirogov<br>46 Pirogova Str.<br>Vinnitsa, 21018<br>UKRAINE                                                                |
| 1167                            | Committee for Ethics Issues of Clinical Trials of State Establishment - Institute of Gerontology of NAMS of Ukraine n.a. D.F.<br>Chebotareva<br>67 Vyshgorodska Street<br>Kyiv, 04114<br>UKRAINE |
| 1179                            | Committee for Ethics Issues of SI "Republican Clinical Hospital of the MoH of Ukraine"<br>9 Yuriya Kotsyubynskogo Street<br>Kyiv, 04053<br>UKRAINE                                               |

| <u>Study Site Number</u> | <u>Independent Ethics Committee or Institutional Review Board Address(es)</u>                                                                                             |
|--------------------------|---------------------------------------------------------------------------------------------------------------------------------------------------------------------------|
| 1522                     | Crimean Republican Institution<br>Clinical Territorial Medical Association 'University Clinic'<br>69, Kyivska Street<br>Simferopol, CRIMEA 95017<br>UKRAINE               |
| 1662                     | Committee for Ethics Issues of Multifield Medical Center Of Odesa National Medical University<br>"University Clinic #1"<br>3 Valikhovskyi Lane<br>Odesa, 65082<br>UKRAINE |

090177e18c5470f7\Approved\Approved On: 05-Oct-2017 23:40 (GMT)

**UNITED KINGDOM****Study Site Number** **Independent Ethics Committee or Institutional Review Board Address(es)**

|      |                                                                                                                                                   |
|------|---------------------------------------------------------------------------------------------------------------------------------------------------|
| 1369 | West Midlands- Edgbaston Research Ethics Committee<br>The Old Chapel, Royal Standard Place<br>Nottingham, WEST MIDLANDS NG1 6FS<br>UNITED KINGDOM |
| 1371 | West Midlands – Edgbaston Research Ethics Committee<br>The Old Chapel, Royal Standard Place<br>Nottingham, WEST MIDLANDS NG16FS<br>UNITED KINGDOM |
| 1374 | NRES Committee West Midlands - Edgbaston<br>The Old Chapel, Royal Standard Place<br>Nottingham, WEST MIDLANDS NG1 6FS<br>UNITED KINGDOM           |
| 1375 | West Midlands – Edgbaston Research Ethics Committee<br>The Old Chapel, Royal Standard Place<br>Nottingham, WEST MIDLANDS NG16FS<br>UNITED KINGDOM |



## UNITED STATES

**Study Site Number** **Independent Ethics Committee or Institutional Review Board Address(es)**

|      |                                                                                     |
|------|-------------------------------------------------------------------------------------|
| 1001 | Quorum Review IRB<br>1601 Fifth Ave, Ste 1000<br>Seattle, WA 98101<br>UNITED STATES |
| 1002 | Quorum Review IRB<br>1501 Fourth Ave, Ste 800<br>Seattle, WA 98101<br>UNITED STATES |
| 1003 | Quorum Review IRB<br>1501 Fourth Ave, Ste 800<br>Seattle, WA 98101<br>UNITED STATES |
| 1004 | Quorum Review IRB<br>1501 Fourth Ave, Ste 800<br>Seattle, WA 98101<br>UNITED STATES |
| 1005 | Quorum Review IRB<br>1501 Fourth Ave, Ste 800<br>Seattle, WA 98101<br>UNITED STATES |
| 1006 | Quorum Review IRB<br>1501 Fourth Ave, Ste 800<br>Seattle, WA 98101<br>UNITED STATES |
| 1008 | Quorum Review IRB<br>1501 Fourth Ave, Ste 800<br>Seattle, WA 98101<br>UNITED STATES |

| <b><u>Study Site Number</u></b> | <b><u>Independent Ethics Committee or Institutional Review Board Address(es)</u></b>                               |
|---------------------------------|--------------------------------------------------------------------------------------------------------------------|
| 1009                            | Quorum Institutional Review Board<br>1601 Fifth Ave, Ste 1000<br>Seattle, WA 98101<br>UNITED STATES                |
| 1010                            | Quorum Review IRB<br>1501 Fourth Ave, Ste 800<br>Seattle, WA 98101<br>UNITED STATES                                |
| 1011                            | Vanderbilt Institutional Review Board<br>1313 21st Ave S, 504 Oxford House<br>Nashville, TN 37232<br>UNITED STATES |
| 1012                            | Quorum Review IRB<br>1501 Fourth Ave, Ste 800<br>Seattle, WA 98101<br>UNITED STATES                                |
| 1013                            | Quorum Review IRB<br>1501 Fourth Ave, Ste 800<br>Seattle, WA 98101<br>UNITED STATES                                |
| 1014                            | Quorum Review IRB<br>1601 Fifth Ave, Ste 1000<br>Seattle, WA 98101<br>UNITED STATES                                |
| 1016                            | Quorum Review IRB<br>1501 Fourth Ave, Ste 800<br>Seattle, WA 98101<br>UNITED STATES                                |

| <b><u>Study Site Number</u></b> | <b><u>Independent Ethics Committee or Institutional Review Board Address(es)</u></b>                         |
|---------------------------------|--------------------------------------------------------------------------------------------------------------|
| 1017                            | Quorum Institutional Review Board<br>1601 Fifth Ave, Ste 1000<br>Seattle, WA 98101<br>UNITED STATES          |
| 1018                            | Quorum Review IRB<br>1501 Fourth Ave, Ste 800<br>Seattle, WA 98101<br>UNITED STATES                          |
| 1019                            | Quorum Review IRB<br>1601 Fifth Ave, Ste 1000<br>Seattle, WA 98101<br>UNITED STATES                          |
| 1020                            | Baylor Research Institute IRB<br>3310 Live Oak, White/Blue/Red, Ste 501<br>Dallas, TX 75204<br>UNITED STATES |
| 1024                            | Quorum Review IRB<br>1501 Fourth Ave, Ste 800<br>Seattle, WA 98101<br>UNITED STATES                          |
| 1026                            | Quorum Review IRB<br>1501 Fourth Ave, Ste 800<br>Seattle, WA 98101<br>UNITED STATES                          |
| 1027                            | Quorum Review IRB<br>1501 Fourth Ave, Ste 800<br>Seattle, WA 98101<br>UNITED STATES                          |

| <b><u>Study Site Number</u></b> | <b><u>Independent Ethics Committee or Institutional Review Board Address(es)</u></b>                 |
|---------------------------------|------------------------------------------------------------------------------------------------------|
| 1028                            | Gundersen Clinic, Ltd Human Subjects Committee<br>1836 S Ave<br>La Crosse, WI 54601<br>UNITED STATES |
| 1029                            | Quorum Review IRB<br>1501 Fourth Ave, Ste 800<br>Seattle, WA 98101<br>UNITED STATES                  |
| 1030                            | Quorum Institutional Review Board<br>1601 Fifth Ave, Ste 1000<br>Seattle, WA 98101<br>UNITED STATES  |
| 1031                            | Quorum Review IRB<br>1501 Fourth Ave, Ste 800<br>Seattle, WA 98101<br>UNITED STATES                  |
| 1032                            | Quorum Review IRB<br>1501 Fourth Ave, Ste 800<br>Seattle, WA 98101<br>UNITED STATES                  |
| 1040                            | Quorum Review IRB<br>1501 Fourth Ave, Ste 800<br>Seattle, WA 98101<br>UNITED STATES                  |
| 1065                            | Quorum Review IRB<br>1601 Fifth St, Ste 1000<br>Seattle, WA 98101<br>UNITED STATES                   |

**Study Site Number**   **Independent Ethics Committee or Institutional Review Board Address(es)**

|      |                                                                                                                                                       |
|------|-------------------------------------------------------------------------------------------------------------------------------------------------------|
| 1092 | Quorum Institutional Review Board<br>1601 Fifth Ave, Ste 1000<br>Seattle, WA 98101<br>UNITED STATES                                                   |
| 1094 | Stanford University Administrative Panel on Human Subjects in Medical Research<br>1215 Welch Rd, Module A<br>Stanford, CT 94305-5401<br>UNITED STATES |
| 1095 | Quorum Institutional Review Board<br>1601 Fifth Ave, Ste 1000<br>Seattle, WA 98101<br>UNITED STATES                                                   |
| 1096 | Quorum Review IRB<br>1501 Fourth Ave, Ste 800<br>Seattle, WA 98101<br>UNITED STATES                                                                   |
| 1097 | Quorum Review IRB<br>1601 Fifth St, Ste 1000<br>Seattle, WA 98101<br>UNITED STATES                                                                    |
| 1098 | Quorum Review IRB<br>1501 Fourth Ave, Ste 800<br>Seattle, WA 98101<br>UNITED STATES                                                                   |
| 1100 | Quorum Review IRB<br>1501 Fourth Ave, Ste 800<br>Seattle, WA 98101<br>UNITED STATES                                                                   |

| <b><u>Study Site Number</u></b> | <b><u>Independent Ethics Committee or Institutional Review Board Address(es)</u></b>                               |
|---------------------------------|--------------------------------------------------------------------------------------------------------------------|
| 1101                            | Quorum Review IRB<br>1501 Fourth Ave, Ste 800<br>Seattle, WA 98101<br>UNITED STATES                                |
| 1105                            | LSU Health Sciences Center<br>Institutional Review Board, 433 Bolivar St<br>New Orleans, LA 70112<br>UNITED STATES |
| 1106                            | Quorum Review IRB<br>1501 Fourth Ave, Ste 800<br>Seattle, WA 98101<br>UNITED STATES                                |
| 1107                            | Quorum Review IRB<br>1601 Fifth St, Ste 1000<br>Seattle, WA 98101<br>UNITED STATES                                 |
| 1108                            | Western Institutional Review Board<br>1019 39th Ave Se, Ste 120<br>Puyallup, WA 98374<br>UNITED STATES             |
| 1109                            | Quorum Review IRB<br>1501 Fourth Ave, Ste 800<br>Seattle, WA 98101<br>UNITED STATES                                |
| 1110                            | Quorum Review IRB<br>1601 Fifth St, Ste 1000<br>Seattle, WA 98101<br>UNITED STATES                                 |

| <b><u>Study Site Number</u></b> | <b><u>Independent Ethics Committee or Institutional Review Board Address(es)</u></b>                |
|---------------------------------|-----------------------------------------------------------------------------------------------------|
| 1112                            | Quorum Institutional Review Board<br>1601 Fifth Ave, Ste 1000<br>Seattle, WA 98101<br>UNITED STATES |
| 1113                            | Quorum Review IRB<br>1501 Fourth Ave, Ste 800<br>Seattle, WA 98101<br>UNITED STATES                 |
| 1114                            | Western Institutional Review Board<br>3535 7th Ave. SW<br>Olympia, WA 98052<br>UNITED STATES        |
| 1117                            | Quorum Review IRB<br>1601 Fifth St, Ste 1000<br>Seattle, WA 98101<br>UNITED STATES                  |
| 1118                            | Quorum Review IRB<br>1601 Fifth Ave, Ste 1000<br>Seattle, WA 98101<br>UNITED STATES                 |
| 1120                            | Ochsner Institutional Review Board<br>1514 Jefferson Hwy<br>New Orleans, LA 70121<br>UNITED STATES  |
| 1121                            | Quorum Review IRB<br>1601 Fifth St, Ste 1000<br>Seattle, WA 98101<br>UNITED STATES                  |

| <b><u>Study Site Number</u></b> | <b><u>Independent Ethics Committee or Institutional Review Board Address(es)</u></b>                                                                       |
|---------------------------------|------------------------------------------------------------------------------------------------------------------------------------------------------------|
| 1128                            | Office for the Protection of Research Subjects- Northwestern University<br>Rubloff Bldg, 750 N Lake Shore Dr, 7th Fl<br>Chicago, IL 60611<br>UNITED STATES |
| 1153                            | Quorum Review IRB<br>1501 Fourth Ave, Ste 800<br>Seattle, WA 98101<br>UNITED STATES                                                                        |
| 1169                            | Quorum Review IRB<br>1601 Fifth St, Ste 1000<br>Seattle, WA 98101<br>UNITED STATES                                                                         |
| 1171                            | Quorum Review IRB<br>1501 Fourth Ave, Ste 800<br>Seattle, WA 98101<br>UNITED STATES                                                                        |
| 1172                            | Quorum Review IRB<br>1601 Fifth St, Ste 1000<br>Seattle, WA 98101<br>UNITED STATES                                                                         |
| 1190                            | Quorum Institutional Review Board<br>1601 Fifth Ave, Ste 1000<br>Seattle, WA 98101<br>UNITED STATES                                                        |
| 1191                            | Quorum Review IRB<br>1501 Fourth Ave, Ste 800<br>Seattle, WA 98101<br>UNITED STATES                                                                        |



| <b><u>Study Site Number</u></b> | <b><u>Independent Ethics Committee or Institutional Review Board Address(es)</u></b>                |
|---------------------------------|-----------------------------------------------------------------------------------------------------|
| 1192                            | Quorum Institutional Review Board<br>1601 Fifth Ave, Ste 1000<br>Seattle, WA 98101<br>UNITED STATES |
| 1193                            | Quorum Review IRB<br>1501 Fourth Ave, Ste 800<br>Seattle, WA 98101<br>UNITED STATES                 |
| 1194                            | Quorum Review IRB<br>1501 Fourth Ave, Ste 800<br>Seattle, WA 98101<br>UNITED STATES                 |
| 1196                            | Quorum Review IRB<br>1501 Fourth Ave, Ste 800<br>Seattle, WA 98101<br>UNITED STATES                 |
| 1197                            | Quorum Institutional Review Board<br>1601 Fifth Ave, Ste 1000<br>Seattle, WA 98101<br>UNITED STATES |
| 1198                            | Quorum Review IRB<br>1501 Fourth Ave, Ste 800<br>Seattle, WA 98101<br>UNITED STATES                 |
| 1199                            | Quorum Review IRB<br>1601 Fifth St, Ste 1000<br>Seattle, WA 98101<br>UNITED STATES                  |

| <b><u>Study Site Number</u></b> | <b><u>Independent Ethics Committee or Institutional Review Board Address(es)</u></b>                |
|---------------------------------|-----------------------------------------------------------------------------------------------------|
| 1201                            | Quorum Institutional Review Board<br>1601 Fifth Ave, Ste 1000<br>Seattle, WA 98101<br>UNITED STATES |
| 1203                            | Quorum Review IRB<br>1501 Fourth Ave, Ste 800<br>Seattle, WA 98101<br>UNITED STATES                 |
| 1204                            | Quorum Review IRB<br>1501 Fourth Ave, Ste 800<br>Seattle, WA 98101<br>UNITED STATES                 |
| 1206                            | Quorum Review IRB<br>1501 Fourth Ave, Ste 800<br>Seattle, WA 98101<br>UNITED STATES                 |
| 1208                            | Quorum Review IRB<br>1501 Fourth Ave, Ste 800<br>Seattle, WA 98101<br>UNITED STATES                 |
| 1209                            | Quorum Review IRB<br>1501 Fourth Ave, Ste 800<br>Seattle, WA 98101<br>UNITED STATES                 |
| 1210                            | Quorum Review IRB<br>1601 Fifth St, Ste 1000<br>Seattle, WA 98101<br>UNITED STATES                  |

| <b><u>Study Site Number</u></b> | <b><u>Independent Ethics Committee or Institutional Review Board Address(es)</u></b>                |
|---------------------------------|-----------------------------------------------------------------------------------------------------|
| 1211                            | Quorum Review IRB<br>1501 Fourth Ave, Ste 800<br>Seattle, WA 98101<br>UNITED STATES                 |
| 1213                            | Quorum Institutional Review Board<br>1601 Fifth Ave, Ste 1000<br>Seattle, WA 98101<br>UNITED STATES |
| 1214                            | Trinity IRB Institutional Review Board<br>One Burdick Expy W<br>Minot, ND 58701<br>UNITED STATES    |
| 1215                            | Quorum Institutional Review Board<br>1601 Fifth Ave, Ste 1000<br>Seattle, WA 98101<br>UNITED STATES |
| 1216                            | Quorum Review IRB<br>1501 Fourth Ave, Ste 800<br>Seattle, WA 98101<br>UNITED STATES                 |
| 1217                            | Quorum Institutional Review Board<br>1601 Fifth Ave, Ste 1000<br>Seattle, WA 98101<br>UNITED STATES |
| 1218                            | Quorum Review IRB<br>1501 Fourth Ave, Ste 800<br>Seattle, WA 98101<br>UNITED STATES                 |

| <b><u>Study Site Number</u></b> | <b><u>Independent Ethics Committee or Institutional Review Board Address(es)</u></b>                                                 |
|---------------------------------|--------------------------------------------------------------------------------------------------------------------------------------|
| 1219                            | Quorum Review IRB<br>1501 Fourth Ave, Ste 800<br>Seattle, WA 98101<br>UNITED STATES                                                  |
| 1221                            | Health Science Institutional Review Board<br>University of Missouri-Columbia, 190 Galena Hall<br>Columbia, MO 65212<br>UNITED STATES |
| 1222                            | Quorum Review IRB<br>1501 Fourth Ave, Ste 800<br>Seattle, WA 98101<br>UNITED STATES                                                  |
| 1223                            | Quorum Review IRB<br>1501 Fourth Ave, Ste 800<br>Seattle, WA 98101<br>UNITED STATES                                                  |
| 1224                            | Quorum Review IRB<br>1601 Fifth St, Ste 1000<br>Seattle, WA 98101<br>UNITED STATES                                                   |
| 1225                            | Quorum Review IRB<br>1501 Fourth Ave, Ste 800<br>Seattle, WA 98101<br>UNITED STATES                                                  |
| 1228                            | Quorum Review IRB<br>1501 Fourth Ave, Ste 800<br>Seattle, WA 98101<br>UNITED STATES                                                  |

| <b><u>Study Site Number</u></b> | <b><u>Independent Ethics Committee or Institutional Review Board Address(es)</u></b> |
|---------------------------------|--------------------------------------------------------------------------------------|
| 1231                            | Quorum Review IRB<br>1501 Fourth Ave, Ste 800<br>Seattle, WA 98101<br>UNITED STATES  |
| 1238                            | Quorum Review IRB<br>1501 Fourth Ave, Ste 800<br>Seattle, WA 98101<br>UNITED STATES  |
| 1241                            | Quorum Review IRB<br>1601 Fifth St, Ste 1000<br>Seattle, WA 98101<br>UNITED STATES   |
| 1242                            | Quorum Review IRB<br>1501 Fourth Ave, Ste 800<br>Seattle, WA 98101<br>UNITED STATES  |
| 1243                            | Quorum Review IRB<br>1501 Fourth Ave, Ste 800<br>Seattle, WA 98101<br>UNITED STATES  |
| 1244                            | Quorum Review IRB<br>1601 Fifth St, Ste 1000<br>Seattle, WA 98101<br>UNITED STATES   |
| 1246                            | Quorum Review IRB<br>1501 Fourth Ave, Ste 800<br>Seattle, WA 98101<br>UNITED STATES  |

| <b><u>Study Site Number</u></b> | <b><u>Independent Ethics Committee or Institutional Review Board Address(es)</u></b>                        |
|---------------------------------|-------------------------------------------------------------------------------------------------------------|
| 1251                            | Quorum Review IRB<br>1501 Fourth Ave, Ste 800<br>Seattle, WA 98101<br>UNITED STATES                         |
| 1252                            | Quorum Review IRB<br>1501 Fourth Ave, Ste 800<br>Seattle, WA 98101<br>UNITED STATES                         |
| 1254                            | Quorum Review IRB<br>1501 Fourth Ave, Ste 800<br>Seattle, WA 98101<br>UNITED STATES                         |
| 1255                            | Quorum Review IRB<br>1501 Fourth Ave, Ste 800<br>Seattle, WA 98101<br>UNITED STATES                         |
| 1256                            | University of Arizona<br>Institutional Review Board<br>1618 E Helen St<br>Tucson, AZ 85721<br>UNITED STATES |
| 1260                            | Quorum Review IRB<br>1501 Fourth Ave, Ste 800<br>Seattle, WA 98101<br>UNITED STATES                         |
| 1261                            | Quorum Review IRB<br>1501 Fourth Ave, Ste 800<br>Seattle, WA 98101<br>UNITED STATES                         |

| <b><u>Study Site Number</u></b> | <b><u>Independent Ethics Committee or Institutional Review Board Address(es)</u></b>                                                       |
|---------------------------------|--------------------------------------------------------------------------------------------------------------------------------------------|
| 1266                            | Quorum Review IRB<br>1601 Fifth St, Ste 1000<br>Seattle, WA 98101<br>UNITED STATES                                                         |
| 1270                            | Loyola University Medical Center, Committee for the Protection of Human Subjects<br>2160 S First Ave<br>Maywood, IL 60153<br>UNITED STATES |
| 1281                            | Quorum Review IRB<br>1501 Fourth Ave, Ste 800<br>Seattle, WA 98101<br>UNITED STATES                                                        |
| 1282                            | Quorum Review IRB<br>1601 Fifth St, Ste 1000<br>Seattle, WA 98101<br>UNITED STATES                                                         |
| 1283                            | Quorum Review IRB<br>1501 Fourth Ave, Ste 800<br>Seattle, WA 98101<br>UNITED STATES                                                        |
| 1284                            | Quorum Review IRB<br>1501 Fourth Ave, Ste 800<br>Seattle, WA 98101<br>UNITED STATES                                                        |
| 1305                            | Quorum Review IRB<br>1601 Fifth St, Ste 1000<br>Seattle, WA 98101<br>UNITED STATES                                                         |

| <b><u>Study Site Number</u></b> | <b><u>Independent Ethics Committee or Institutional Review Board Address(es)</u></b>                                                                                       |
|---------------------------------|----------------------------------------------------------------------------------------------------------------------------------------------------------------------------|
| 1310                            | Quorum Review IRB<br>1501 Fourth Ave, Ste 800<br>Seattle, WA 98101<br>UNITED STATES                                                                                        |
| 1465                            | Quorum Institutional Review Board<br>1601 Fifth Ave, Ste 1000<br>Seattle, WA 98101<br>UNITED STATES                                                                        |
| 1466                            | Quorum Institutional Review Board<br>1601 Fifth Ave, Ste 1000<br>Seattle, WA 98101<br>UNITED STATES                                                                        |
| 1470                            | University of Southern California Health Science Campus Institutional Review Board<br>1200 N State St, General Hospital Ste 4700<br>Los Angeles, CA 90033<br>UNITED STATES |
| 1472                            | Quorum Review IRB<br>1501 Fourth Ave, Ste 800<br>Seattle, WA 98101<br>UNITED STATES                                                                                        |
| 1473                            | North Mississippi Health Services Institutional Review Board<br>830 S Gloster St<br>Tupelo, MS 38801<br>UNITED STATES                                                      |
| 1474                            | Quorum Review IRB<br>1501 Fourth Ave, Ste 800<br>Seattle, WA 98101<br>UNITED STATES                                                                                        |



**Study Site Number**   **Independent Ethics Committee or Institutional Review Board Address(es)**

|      |                                                                                                                                                                                |
|------|--------------------------------------------------------------------------------------------------------------------------------------------------------------------------------|
| 1476 | University of Connecticut Health Center Institutional Review Board<br>16 Munson Rd<br>Farmington, CT 06030-3926<br>UNITED STATES                                               |
| 1478 | University of California San Diego Human Research Protections Program<br>9444 Medical Center Drive<br>E Campus Ofc Bldg (ECOB) First Fl<br>La Jolla, CA 92093<br>UNITED STATES |
| 1479 | Quorum Review IRB<br>1501 Fourth Ave, Ste 800<br>Seattle, WA 98101<br>UNITED STATES                                                                                            |
| 1480 | Quorum Review IRB<br>1501 Fourth Ave, Ste 800<br>Seattle, WA 98101<br>UNITED STATES                                                                                            |
| 1481 | UCLA Office of the Human Research Protection Program (OHRPP)<br>11000 Kinross Ave, Ste 211 Box 951694<br>Los Angeles, CA 90095<br>UNITED STATES                                |
| 1482 | Quorum Review IRB<br>1501 Fourth Ave, Ste 800<br>Seattle, WA 98101<br>UNITED STATES                                                                                            |
| 1483 | Quorum Review IRB<br>1501 Fourth Ave, Ste 800<br>Seattle, WA 98101<br>UNITED STATES                                                                                            |

| <b><u>Study Site Number</u></b> | <b><u>Independent Ethics Committee or Institutional Review Board Address(es)</u></b>                                                 |
|---------------------------------|--------------------------------------------------------------------------------------------------------------------------------------|
| 1484                            | Quorum Review IRB<br>1501 Fourth Ave, Ste 800<br>Seattle, WA 98101<br>UNITED STATES                                                  |
| 1485                            | Quorum Review IRB<br>1501 Fourth Ave, Ste 800<br>Seattle, WA 98101<br>UNITED STATES                                                  |
| 1486                            | Dartmouth College Committee for the Protection of Human Subjects<br>63 S Main St, 3rd Fl #6254<br>Hanover, NH 03755<br>UNITED STATES |
| 1488                            | Quorum Review IRB<br>1601 Fifth St, Ste 1000<br>Seattle, WA 98101<br>UNITED STATES                                                   |
| 1489                            | Quorum Review IRB<br>1601 Fifth Ave, Ste 1000<br>Seattle, WA 98101<br>UNITED STATES                                                  |
| 1490                            | Quorum Review IRB<br>1501 Fourth Ave, Ste 800<br>Seattle, WA 98101<br>UNITED STATES                                                  |
| 1492                            | Quorum Review IRB<br>1501 Fourth Ave, Ste 800<br>Seattle, WA 98101<br>UNITED STATES                                                  |

| <b><u>Study Site Number</u></b> | <b><u>Independent Ethics Committee or Institutional Review Board Address(es)</u></b>                                                                      |
|---------------------------------|-----------------------------------------------------------------------------------------------------------------------------------------------------------|
| 1493                            | Quorum Review IRB<br>1501 Fourth Ave, Ste 800<br>Seattle, WA 98101<br>UNITED STATES                                                                       |
| 1498                            | Quorum Review IRB<br>1501 Fourth Ave, Ste 800<br>Seattle, WA 98101<br>UNITED STATES                                                                       |
| 1499                            | University of North Texas Health Science Center at Fort Worth Institutional Review Board<br>3400 Camp Bowie Blvd<br>Fort Worth, TX 76107<br>UNITED STATES |
| 1500                            | Quorum Review IRB<br>1501 Fourth Ave, Ste 800<br>Seattle, WA 98101<br>UNITED STATES                                                                       |
| 1501                            | Quorum Review IRB<br>1501 Fourth Ave, Ste 800<br>Seattle, WA 98101<br>UNITED STATES                                                                       |
| 1502                            | Quorum Review IRB<br>1501 Fourth Ave, Ste 800<br>Seattle, WA 98101<br>UNITED STATES                                                                       |
| 1503                            | Quorum Review IRB<br>1501 Fourth Ave, Ste 800<br>Seattle, WA 98101<br>UNITED STATES                                                                       |

| <b><u>Study Site Number</u></b> | <b><u>Independent Ethics Committee or Institutional Review Board Address(es)</u></b>                                                                         |
|---------------------------------|--------------------------------------------------------------------------------------------------------------------------------------------------------------|
| 1504                            | Quorum Review IRB<br>1501 Fourth Ave, Ste 800<br>Seattle, WA 98101<br>UNITED STATES                                                                          |
| 1505                            | New York University School of Medicine<br>Institutional Board of Research Associates<br>550 First Ave, Bldg #VET 10 W<br>New York, NY 10016<br>UNITED STATES |
| 1506                            | Quorum Review IRB<br>1601 Fifth St, Ste 1000<br>Seattle, WA 98101<br>UNITED STATES                                                                           |
| 1510                            | Quorum Review IRB<br>1601 Fifth St, Ste 1000<br>Seattle, WA 98101<br>UNITED STATES                                                                           |
| 1531                            | Institutional Review Board for Human Research<br>Ofc of Research Integrity<br>19 Hagood Ave, Ste 601- MSC #857<br>Charleston, SC 29425<br>UNITED STATES      |
| 1538                            | Quorum Review IRB<br>1501 Fourth Ave, Ste 800<br>Seattle, WA 98101<br>UNITED STATES                                                                          |
| 1540                            | Quorum Review IRB<br>1601 Fifth St, Ste 1000<br>Seattle, WA 98101<br>UNITED STATES                                                                           |

| <b><u>Study Site Number</u></b> | <b><u>Independent Ethics Committee or Institutional Review Board Address(es)</u></b>             |
|---------------------------------|--------------------------------------------------------------------------------------------------|
| 1547                            | Quorum Review IRB<br>1601 Fifth St, Ste 1000<br>Seattle, WA 98101<br>UNITED STATES               |
| 1548                            | Quorum Review IRB<br>1501 Fourth Ave, Ste 800<br>Seattle, WA 98101<br>UNITED STATES              |
| 1550                            | Quorum Review IRB<br>1501 Fourth Ave, Ste 800<br>Seattle, WA 98101<br>UNITED STATES              |
| 1557                            | Quorum Review IRB<br>1501 Fourth Ave, Ste 800<br>Seattle, WA 98101<br>UNITED STATES              |
| 1560                            | Quorum Review IRB<br>1501 Fourth Ave, Ste 800<br>Seattle, WA 98101<br>UNITED STATES              |
| 1598                            | Western Institutional Review Board<br>3535 Seventh Ave, SW<br>Olympia, WA 98502<br>UNITED STATES |
| 1620                            | Quorum Review IRB<br>1501 Fourth Ave, Ste 800<br>Seattle, WA 98101<br>UNITED STATES              |

| <u>Study Site Number</u> | <u>Independent Ethics Committee or Institutional Review Board Address(es)</u>                                                          |
|--------------------------|----------------------------------------------------------------------------------------------------------------------------------------|
| 1631                     | Quorum Review IRB<br>1501 Fourth Ave, Ste 800<br>Seattle, WA 98101<br>UNITED STATES                                                    |
| 1633                     | Oklahoma Medical Research Foundation - Institutional Review Board<br>825 NE 13th St, MS #9<br>Oklahoma City, OK 73104<br>UNITED STATES |
| 1643                     | Quorum Review IRB<br>1501 Fourth Ave, Ste 800<br>Seattle, WA 98101<br>UNITED STATES                                                    |

090177e18c5470f7\Approved\Approved On: 05-Oct-2017 23:40 (GMT)

16.1.4.1 LIST OF INVESTIGATORS AND CORRESPONDING ETHICS COMMITTEES OR INSTITUTIONAL REVIEW BOARDS

Japan

Coordinating Investigators:

<None Entered>

| <u>Center</u> |            |            |            |            | <u>Institutional Review Board or Ethics Committee Address(es)</u>                                                                        |
|---------------|------------|------------|------------|------------|------------------------------------------------------------------------------------------------------------------------------------------|
| 1001          | [REDACTED] | [REDACTED] | [REDACTED] | [REDACTED] | National Hospital Organization<br>Chiba-East Hospital<br>673<br>Nitona-chou<br>Chuo-ku<br>Chiba, Chiba 260-8712<br>JAPAN                 |
| 1002          | [REDACTED] | [REDACTED] | [REDACTED] | [REDACTED] | The University of Tokyo hospital<br>IRB<br>7-3-1<br>Hongo<br>Bunkyo-ku, Tokyo 113-8655<br>JAPAN                                          |
| 1003          | [REDACTED] | [REDACTED] | [REDACTED] | [REDACTED] | National Hospital Organization<br>Sagamihara National Hospital<br>18-1<br>Sakuradai, Minami-ku<br>Sagamihara, Kanagawa 252-0392<br>JAPAN |

090177e1859bd7b3\Approved\Approved On: 20-Oct-2014 06:37 (GMT)

\* Did not randomize subjects (for randomized study) or enroll subjects (for open study)

| <u>Center</u> |            |            |            | <u>Institutional Review Board or Ethics Committee Address(es)</u>                                                                                  |
|---------------|------------|------------|------------|----------------------------------------------------------------------------------------------------------------------------------------------------|
| 1004          | [REDACTED] | [REDACTED] | [REDACTED] | Niigata University Medical & Dental Hospital IRB<br>754<br>Ichibancho<br>Asahimachidoori<br>Niigata, Niigata 951-8520<br>JAPAN                     |
| 1005          | [REDACTED] | [REDACTED] | [REDACTED] | National Hospital Organization<br>Osaka Minami Center<br>2-1<br>Kidohigashimachi<br>Kawachinagano,<br>Osaka, Japan 586-8521<br>JAPAN               |
| 1006          | [REDACTED] | [REDACTED] | [REDACTED] | University of Occupational and Environmental Health Hospital IRB<br>1-1<br>Iseigaoka<br>Yahata-Nishi-ku<br>Kita-Kyushu,, Fukuoka 807-8555<br>JAPAN |

090177e1859bd7b3\Approved\Approved On: 20-Oct-2014 06:37 (GMT)

\* Did not randomize subjects (for randomized study) or enroll subjects (for open study)



Center  
1007

[REDACTED]

[REDACTED]

[REDACTED]

**Institutional Review Board or  
Ethics Committee Address(es)**  
Tokyo Women's Medical University  
Hospital IRB  
8-1  
Kawada-cho  
Shinjyuku-ku, Tokyo 162-8666  
JAPAN

1008

[REDACTED]

[REDACTED]

[REDACTED]

Tokyo Medical And Dental  
University Hospital, Faculty of  
Medicine IRB  
1-5-45  
Yushima  
Bunkyo-ku,, Tokyo 113-8519  
JAPAN

090177e1859bd7b3\Approved\Approved On: 20-Oct-2014 06:37 (GMT)

| <u>Center</u> |            |            |            |            | <u>Institutional Review Board or Ethics Committee Address(es)</u>                                                                                         |
|---------------|------------|------------|------------|------------|-----------------------------------------------------------------------------------------------------------------------------------------------------------|
| 1009          | [REDACTED] | [REDACTED] | [REDACTED] | [REDACTED] | Institutional Review Board (IRB) of Saitama Medical Center, Saitama Medical University<br>1981<br>Kamoda, Kawagoe-shi<br>Saitama, Japan 350-8550<br>JAPAN |
| 1010          | [REDACTED] | [REDACTED] | [REDACTED] | [REDACTED] | National Hospital Organization<br>MURAYAMA Medical Center IRB<br>2-37-1<br>Gakuen<br>Musashimurayama-shi., Tokyo 208-0011<br>JAPAN                        |
| 1011          | [REDACTED] | [REDACTED] | [REDACTED] | [REDACTED] | Kumamoto Saishunso National Hospital IRB<br>2659<br>Suya,<br>Koushi-shi., Kumamoto 861-1196<br>JAPAN                                                      |
| 1012          | [REDACTED] | [REDACTED] | [REDACTED] | [REDACTED] | Taga General Hospital IRB<br>2-1-2,<br>Kokubu-cho,<br>Hitachi-shi., Ibaraki 316-0035<br>JAPAN                                                             |
| 1013          | [REDACTED] | [REDACTED] | [REDACTED] | [REDACTED] | Juntendo Tokyo Koto Geriatric Medical Center IRB<br>3-3-20<br>shinnsuna,<br>koutou-ku., Tokyo 136-0075<br>JAPAN                                           |

090177e1859bd7b3\Approved\Approved On: 20-Oct-2014 06:37 (GMT)

\* Did not randomize subjects (for randomized study) or enroll subjects (for open study)

| <u>Center</u> |            |            |            | <u>Institutional Review Board or Ethics Committee Address(es)</u>                                                                  |
|---------------|------------|------------|------------|------------------------------------------------------------------------------------------------------------------------------------|
| 1014          | [REDACTED] | [REDACTED] | [REDACTED] | National Hospital Organization<br>Tokyo Medical Center IRB<br>2-5-1<br>Higashigaoka<br>Meguro-ku, Tokyo 152-8902<br>JAPAN          |
| 1015          | [REDACTED] | [REDACTED] | [REDACTED] | Sasaki Foundation Kyoundo Hospital<br>IRB<br>1-8<br>kandasurugadai,<br>chiyoda-ku,, Tokyo 101-0062<br>JAPAN                        |
| 1016          | [REDACTED] | [REDACTED] | [REDACTED] | National Hospital Organization<br>Kyushu Medical Center IRB<br>1-8-1<br>Jigyohama<br>Chuo-ku<br>Fukuoka, Fukuoka 810-8563<br>JAPAN |
| 1017          | [REDACTED] | [REDACTED] | [REDACTED] | NS Clinic Institutional Review Board<br>2-26-9<br>Myojincho<br>Hachioji<br>Tokyo, Japan 192-0046<br>JAPAN                          |

090177e1859bd7b3\Approved\Approved On: 20-Oct-2014 06:37 (GMT)

\* Did not randomize subjects (for randomized study) or enroll subjects (for open study)

| <u>Center</u> |  |  |  | <u>Institutional Review Board or Ethics Committee Address(es)</u>                                                          |
|---------------|--|--|--|----------------------------------------------------------------------------------------------------------------------------|
| 1018          |  |  |  | Juntendo University Hospital IRB<br>Juntendo University Hospital<br>3-1-3<br>Hongo<br>Bunkyo-ku, Tokyo 113-8431<br>JAPAN   |
| 1019          |  |  |  | Kitasato University Kitasato Institute<br>Medical Center Hospital IRB<br>6-100 Arai<br>Kitamoto, Saitama 364-8501<br>JAPAN |
| 1021          |  |  |  | fukushimadaichi hospital IRB<br>16-2<br>Narude<br>Kitasawamata-aza<br>Fukushima, Fukushima 960-8251<br>JAPAN               |
| 1022          |  |  |  | Chiba-ken Saiseikai Narashino<br>Hospital IRB<br>1-1-1<br>Izumi-cho<br>Narashino, Chiba 275-8580<br>JAPAN                  |
| 1023          |  |  |  | Sone Clinic IRB<br>3-31-1<br>Shinjuku<br>Shinjuku-ku, Tokyo 160-0022<br>JAPAN                                              |

090177e1859bd7b3\Approved\Approved On: 20-Oct-2014 06:37 (GMT)

\* Did not randomize subjects (for randomized study) or enroll subjects (for open study)

| <u>Center</u> |            |            |            | <u>Institutional Review Board or Ethics Committee Address(es)</u>                                                              |
|---------------|------------|------------|------------|--------------------------------------------------------------------------------------------------------------------------------|
| 1025          | [REDACTED] | [REDACTED] | [REDACTED] | Sone Clinic IRB<br>sone clinic IRB<br>3-32-8<br>Shinjuku<br>Shinjuku-ku, Tokyo-to 160-0022<br>JAPAN                            |
| 1026          | [REDACTED] | [REDACTED] | [REDACTED] | Aso Iizuka Hospital<br>3-83<br>Yoshio-machi<br>Iiduka, Fukuoka 820-8505<br>JAPAN                                               |
| 1027          | [REDACTED] | [REDACTED] | [REDACTED] | Sone Clinic IRB<br>sone clinic IRB<br>3-32-8<br>Shinjuku<br>Shinjuku-ku, Tokyo-to 160-0022<br>JAPAN                            |
| 1028          | [REDACTED] | [REDACTED] | [REDACTED] | Medical Co. LTA Kyushu clinical<br>pharmacology reserch clinic IRB<br>2-13-16<br>jigyou<br>Chuuu-ku, Fukuoka 810-0064<br>JAPAN |
| 1029          | [REDACTED] | [REDACTED] | [REDACTED] | National Hospital Organization<br>Central Review Board<br>2-5-21<br>Higashigaoka<br>Meguro, Tokyo 152-0021<br>JAPAN            |

090177e1859bd7b3\Approved\Approved On: 20-Oct-2014 06:37 (GMT)

| <u>Center</u> |            |            |            | <u>Institutional Review Board or Ethics Committee Address(es)</u>                                                   |
|---------------|------------|------------|------------|---------------------------------------------------------------------------------------------------------------------|
| 1030          | [REDACTED] | [REDACTED] | [REDACTED] | Sasebo Chuo Hospital IRB<br>Sasebo Chuo Hospital<br>15<br>Yamato-cho<br>Sasebo, Nagasaki 857-1195<br>JAPAN          |
| 1031          | [REDACTED] |            | [REDACTED] | Sone Clinic IRB<br>sone clinic IRB<br>3-32-8<br>Shinjuku<br>Shinjuku-ku, Tokyo-to 160-0022<br>JAPAN                 |
| 1032          | [REDACTED] |            | [REDACTED] | National Hospital Organization<br>Central Review Board<br>2-5-21<br>Higashigaoka<br>Meguro, Tokyo 152-0021<br>JAPAN |
| 1033          | [REDACTED] |            | [REDACTED] | National Hospital Organization<br>Central Review Board<br>2-5-21<br>Higashigaoka<br>Meguro, Tokyo 152-0021<br>JAPAN |
| 1035          | [REDACTED] |            | [REDACTED] | National Hospital Organization<br>Central Review Board<br>2-5-21<br>Higashigaoka<br>Meguro, Tokyo 152-0021<br>JAPAN |

090177e1859bd7b3\Approved\Approved On: 20-Oct-2014 06:37 (GMT)

| <u>Center</u> |            |            |            | <u>Institutional Review Board or Ethics Committee Address(es)</u>                                                   |
|---------------|------------|------------|------------|---------------------------------------------------------------------------------------------------------------------|
| 1036          | [REDACTED] | [REDACTED] | [REDACTED] | Haradoi Hospital IRB<br>6-40-8<br>Aoba<br>Higashi-ku<br>Fukuoka, Fukuoka 813-0025<br>JAPAN                          |
| 1037          | [REDACTED] | [REDACTED] | [REDACTED] | Sapporo city general hospital IRB<br>13-1-1<br>Kita11jonishi<br>Chuo-ku<br>Sapporo, Hokkaido 060-8604<br>JAPAN      |
| 1038          | [REDACTED] | [REDACTED] | [REDACTED] | National Hospital Organization<br>Central Review Board<br>2-5-21<br>Higashigaoka<br>Meguro, Tokyo 152-0021<br>JAPAN |
| 1039          | [REDACTED] | [REDACTED] | [REDACTED] | Nagoya University Hospital IRB<br>65<br>Tsurumai-cho<br>Showa-ku<br>Nagoya, Aichi 466-8560<br>JAPAN                 |

090177e1859bd7b3\Approved\Approved On: 20-Oct-2014 06:37 (GMT)

| <u>Center</u> |            |            |            | <u>Institutional Review Board or Ethics Committee Address(es)</u>                                                                 |
|---------------|------------|------------|------------|-----------------------------------------------------------------------------------------------------------------------------------|
| 1041          | [REDACTED] | [REDACTED] | [REDACTED] | Hokkaido University Hospital IRB<br>Kita 14, Nishi 5<br>Kita-ku<br>Sapporo, Hokkaido 060-8648<br>JAPAN                            |
| 1042          | [REDACTED] | [REDACTED] | [REDACTED] | Hokkaido Medical Center for Rheumatic Diseases IRB<br>3-1-45<br>Ichijo<br>Kotoni, Nishi-ku<br>Sapporo, Hokkaido 063-0811<br>JAPAN |
| 1043          | [REDACTED] | [REDACTED] | [REDACTED] | Toyooka chuo hospital<br>2-1-5<br>Toyooka7jo<br>Asahikawa, Hokkaido 078-8237<br>JAPAN                                             |
| 1044          | [REDACTED] | [REDACTED] | [REDACTED] | Tsukuba University Hospital IRB<br>2-1-1<br>Amakubo<br>Tsukuba, Ibaraki 305-8576<br>JAPAN                                         |

090177e1859bd7b3\Approved\Approved On: 20-Oct-2014 06:37 (GMT)



| <u>Center</u> |            |            |            | <u>Institutional Review Board or Ethics Committee Address(es)</u>                                                                  |
|---------------|------------|------------|------------|------------------------------------------------------------------------------------------------------------------------------------|
| 1045          | [REDACTED] | [REDACTED] | [REDACTED] | Kumamoto Orthopaedic Hospital<br>IRB<br>1-15-7<br>Kuhonji<br>Kumamoto, Kumamoto 862-0976<br>JAPAN                                  |
| 1046          | [REDACTED] | [REDACTED] | [REDACTED] | Higashihiroshima Memorial Hospital<br>IRB<br>2214<br>Yoshiyuki<br>Saijo-cho<br>Higashihiroshima, Hiroshima 739-0002<br>JAPAN       |
| 1047          | [REDACTED] | [REDACTED] | [REDACTED] | Kyoto University Hospital<br>Institutional Review Board<br>54<br>Shogoinkawahara-cho<br>Sakyo-ku<br>Kyoto, Kyoto 606-8507<br>JAPAN |
| 1048          | [REDACTED] | [REDACTED] | [REDACTED] | Nagasaki University Hospital IRB<br>1-7-1<br>Sakamoto<br>Nagasaki, Nagasaki 852-8501<br>JAPAN                                      |

090177e1859bd7b3\Approved\Approved On: 20-Oct-2014 06:37 (GMT)

| <u>Center</u> |            |            |            | <u>Institutional Review Board or Ethics Committee Address(es)</u>                                                                       |
|---------------|------------|------------|------------|-----------------------------------------------------------------------------------------------------------------------------------------|
| 1049          | [REDACTED] | [REDACTED] | [REDACTED] | The Hospital of Hyogo College of Medicine IRB<br>Institutional Review Board<br>1-1 Mukogawa-cho<br>Nishinomiya, Hyogo 663-8501<br>JAPAN |
| 1050          | [REDACTED] | [REDACTED] | [REDACTED] | Inoue Hospital IRB<br>Inoue Hospital<br>55<br>toorimachi<br>Takasaki, Gunma 370-0053<br>JAPAN                                           |
| 1052          | [REDACTED] | [REDACTED] | [REDACTED] | Keihin central clinic, Hisamitsu clinic and Masabayashi clinic IRB<br>2-20-10<br>Hitotsuya<br>Adachiku, Tokyo<br>JAPAN                  |
| 1053          | [REDACTED] | [REDACTED] | [REDACTED] | Tokyo Women's Medical University Hospital IRB<br>8-1<br>Kawada-cho<br>Shinjyuku-ku, Tokyo 162-8666<br>JAPAN                             |
| 1054          | [REDACTED] | [REDACTED] | [REDACTED] | Hanna Hospital Institutional Review Board<br>1-1-31<br>Terakawa<br>Daito-shi<br>Osaka,<br>JAPAN                                         |

090177e1859bd7b3\Approved\Approved On: 20-Oct-2014 06:37 (GMT)

\* Did not randomize subjects (for randomized study) or enroll subjects (for open study)

| <u>Center</u> |            |            |            | <u>Institutional Review Board or Ethics Committee Address(es)</u>                                                                                                             |
|---------------|------------|------------|------------|-------------------------------------------------------------------------------------------------------------------------------------------------------------------------------|
| 1055          | [REDACTED] | [REDACTED] | [REDACTED] | Institutional Review Board of St. Mary's Hospital<br>422<br>Tsubukuhonmachi<br>Kurume-shi, Fukuoka<br>JAPAN                                                                   |
| 1056          | [REDACTED] | [REDACTED] | [REDACTED] | wakaba hospital IRB<br>wakaba hospital IRB<br>609<br>tomiya<br>Sakado, Saitama 350-0208<br>JAPAN                                                                              |
| 1057          | [REDACTED] | [REDACTED] | [REDACTED] | Kitano Hospital IRB<br>2-4-20<br>Ohgi-machi, Kita-ku<br>Osaka, Osaka 530-8480<br>JAPAN                                                                                        |
| 1058          | [REDACTED] | [REDACTED] | [REDACTED] | University Hospital, Kyoto<br>Prefectural University of Medicine<br>IRB<br>465<br>Kajiicho, Hirokoji-Agaru,<br>Kawaramachi-dori, Kamigyo-ku<br>Kyoto, Kyoto 602-8566<br>JAPAN |

090177e1859bd7b3\Approved\Approved On: 20-Oct-2014 06:37 (GMT)

\* Did not randomize subjects (for randomized study) or enroll subjects (for open study)

| <u>Center</u> |            |            |            | <u>Institutional Review Board or Ethics Committee Address(es)</u>                                                                           |
|---------------|------------|------------|------------|---------------------------------------------------------------------------------------------------------------------------------------------|
| 1059          | [REDACTED] | [REDACTED] | [REDACTED] | Hiroshima Red Cross & Atomic-Bomb Survivors Hospital IRB<br>1-9-6<br>Senda-machi<br>Naka-ku<br>Hiroshima, Hiroshima 730-8619<br>JAPAN       |
| 1061          | [REDACTED] | [REDACTED] | [REDACTED] | Keio University Hospital IRB<br>35<br>Shinano-machi<br>Shinjuku-ku, Tokyo 160-8582<br>JAPAN                                                 |
| 1062          | [REDACTED] | [REDACTED] | [REDACTED] | Hamamatsu Clinical Research<br>Network Institutional Review Board<br>2-12-12<br>Naka-ku, Sumiyoshi<br>Hamamatsu, Shizuoka 430-8558<br>JAPAN |

090177e1859bd7b3\Approved\Approved On: 20-Oct-2014 06:37 (GMT)

\* Did not randomize subjects (for randomized study) or enroll subjects (for open study)
